# Supplementary material for: c-Met Mediated Cytokine Network Promotes Brain Metastasis of Breast Cancer by Remodeling Neutrophil Activities
Source: Cancers (Basel). 2023 May 5;15(9):2626. doi: 10.3390/cancers15092626 (PMC10177081; doi:10.3390/cancers15092626)
Supplement: Supplementary file 1 [file cancers-15-02626-s001.zip › s_table_1_primer.xlsx]

## Sheet: Sheet1
mLCN2-F	GGAACGTTTCACCCGCTTTG
mLCN2-R	TGAACCATTGGGTCTCTGCG
mCAT-F	CACTGACGAGATGGCACACT
mCAT-R	TGTGGAGAATCGAACGGCAA
mNOS2-F	CTTTGCCACGGACGAGAC
mNOS2-R	TCATTGTACTCTGAGGGCTGAC
mArg1-F	GAATCTGCATGGGCAACC
mArg1-R	GAATCCTGGTACATCTGGGAAC
mCCL20-F	ACTGTTGCCTCTCGTACATACA
mCCL20-R	GAGGAGGTTCACAGCCCTTTT
mCCL5-F	AAGATCTCTGCAGCTGCCC
mCCL5-R	CTCTATCCTAGCTCATCTCC
mArg2-F	CAAATTCCTTGCGTCCTGACG
mArg2-R	GGTACCTATTGCCAGGCTGT
mBV8-F	TACTGCTACTTCTGCTGCTAC
mBV8-R	CGCCCCCAAAATGGAACTTT
