# Supplementary material for: c-Met Mediated Cytokine Network Promotes Brain Metastasis of Breast Cancer by Remodeling Neutrophil Activities
Source: Cancers (Basel). 2023 May 5;15(9):2626. doi: 10.3390/cancers15092626 (PMC10177081; doi:10.3390/cancers15092626)
Supplement: Supplementary file 1 [file cancers-15-02626-s001.zip › sTable2_deseq .xlsx]

## Sheet: deseq
Geneid	GeneSymbol	RPMI_1	RPMI_2	RPMI_3	DOX-_1	DOX-_2	DOX-_3	DOX+_1	DOX+_2	DOX+_3
ENSMUSG00000036678	Aaas	6.97301	7.06948	6.87324	7.46295	7.40266	7.15807	8.25341	8.29519	8.18979
ENSMUSG00000029482	Aacs	9.81064	9.40302	9.67144	8.35353	8.51648	8.51456	9.31312	9.28991	9.36173
ENSMUSG00000027761	Aadac	1.71176	2.04624	1.80772	2.26907	2.09953	2.39953	1.90363	1.82031	1.62071
ENSMUSG00000091376	Aadacl2	2.03677	2.26262	2.42233	2.36984	1.86378	1.72473	1.61116	1.73158	1.76341
ENSMUSG00000078507	Aadacl3	3.48774	3.87721	3.75716	4.07422	4.0314	4.08355	3.18942	3.88388	3.44527
ENSMUSG00000057228	Aadat	3.06291	3.35708	2.85455	3.69997	3.23236	3.30885	2.49003	3.02601	2.56341
ENSMUSG00000021482	Aaed1	8.10797	8.61654	8.12579	8.25129	8.31612	8.10161	8.57415	8.62139	8.8162
ENSMUSG00000037257	Aagab	9.39693	9.54144	9.30615	8.75311	8.92687	8.64825	9.44668	9.582	9.57559
ENSMUSG00000057230	Aak1	8.00343	8.10287	8.18782	8.07637	8.02696	8.01519	8.28972	8.6552	8.45467
ENSMUSG00000035642	Aamdc	4.39795	4.11836	4.1052	4.54828	4.2671	4.00488	3.62859	3.94662	4.31951
ENSMUSG00000006299	Aamp	8.99724	9.06454	8.78717	9.68254	9.69255	9.45637	9.58267	9.54753	9.92353
ENSMUSG00000020804	Aanat	6.86663	7.47232	6.98353	7.25337	7.4532	7.43198	7.5756	7.72046	7.59151
ENSMUSG00000027628	Aar2	6.52781	6.15761	6.05096	6.44712	6.22866	6.39841	6.48833	6.45958	6.47876
ENSMUSG00000068522	Aard	2.0802	2.38341	2.35797	2.02908	2.33689	2.22566	2.20311	2.04756	1.62188
ENSMUSG00000031960	Aars	7.44213	7.2736	7.14553	8.8817	8.93607	8.89541	9.33606	9.38592	9.82226
ENSMUSG00000023938	Aars2	5.1801	5.24164	5.3297	6.21342	5.75432	5.68964	5.24843	5.3202	5.46431
ENSMUSG00000075528	Aarsd1	5.04362	4.4082	4.8049	4.79143	4.81711	4.94365	5.19891	4.96139	5.3365
ENSMUSG00000055923	Aasdh	5.83486	5.8128	5.43953	6.26829	6.18022	5.96755	5.86386	5.94667	5.83867
ENSMUSG00000025894	Aasdhppt	5.98965	6.05234	5.99935	5.95122	5.74421	5.84704	6.17929	6.02511	6.78586
ENSMUSG00000029695	Aass	4.25292	4.5361	4.41036	5.073	4.65209	4.59626	4.06913	3.71976	3.5963
ENSMUSG00000018697	Aatf	7.85647	7.84913	7.82195	7.37171	7.48398	7.38262	7.47121	7.60249	7.67007
ENSMUSG00000025375	Aatk	10.8031	10.6049	10.6595	6.6959	6.67247	6.54247	9.43899	9.23665	8.62884
ENSMUSG00000044471	AB041803	4.54414	4.28752	4.39765	4.33896	4.59685	4.3352	3.92597	3.61166	3.69674
ENSMUSG00000046109	AB041806	2.25358	1.82154	1.94639	2.30518	1.89336	2.24137	1.94347	1.862	1.90062
ENSMUSG00000093789	AB099516	2.85509	3.19704	3.03044	2.79897	2.93897	2.83548	2.40253	3.05337	2.83863
ENSMUSG00000057191	AB124611	11.6155	11.7782	11.4442	10.7501	10.8135	10.6794	11.7118	11.5958	11.6921
ENSMUSG00000057880	Abat	5.18437	5.03476	5.36319	5.00175	4.87268	4.95227	4.74163	4.60974	4.78946
ENSMUSG00000015243	Abca1	6.84154	6.80629	6.533	12.5925	12.6189	12.6368	12.0191	12.6514	13.1371
ENSMUSG00000050296	Abca12	5.26244	5.40122	5.21889	6.06084	5.57219	5.94779	5.07887	4.84682	4.60426
ENSMUSG00000004668	Abca13	12.5428	12.1749	12.6326	12.4343	12.4428	12.5415	11.1834	11.5876	11.3412
ENSMUSG00000062017	Abca14	4.43455	5.02222	4.74243	5.32736	5.19198	5.14693	4.73491	4.16973	4.59402
ENSMUSG00000054746	Abca15	4.49094	4.59361	4.38396	5.3209	5.18587	5.035	4.24954	4.09688	3.96568
ENSMUSG00000051900	Abca16	5.21072	4.78502	5.3092	5.46991	5.54734	5.35469	4.58635	4.77395	4.33407
ENSMUSG00000035435	Abca17	4.50164	4.69388	4.93279	4.61736	4.20076	3.97918	4.67783	4.24387	4.14896
ENSMUSG00000026944	Abca2	9.11836	8.97054	8.9804	8.34759	8.44216	8.51953	8.48554	8.64213	8.21071
ENSMUSG00000024130	Abca3	9.96639	10.248	9.88386	8.61004	8.66315	8.74032	9.80641	9.98394	9.78893
ENSMUSG00000028125	Abca4	5.9021	5.96031	5.83996	5.94387	6.16766	5.8637	5.33382	4.98909	4.9671
ENSMUSG00000018800	Abca5	6.01506	6.19856	6.37469	7.42424	7.17359	7.05799	6.66277	6.79508	6.82849
ENSMUSG00000044749	Abca6	4.69712	4.75975	4.61772	5.02044	5.29699	4.88233	4.46332	4.54323	4.34647
ENSMUSG00000035722	Abca7	11.9601	11.9699	11.8548	12.9426	12.9817	12.8852	12.3983	12.4828	12.394
ENSMUSG00000041828	Abca8a	5.02392	5.21166	4.90362	5.26439	4.74372	5.41938	4.57059	4.57529	3.9207
ENSMUSG00000020620	Abca8b	5.62505	5.67892	5.38854	5.75114	5.24032	6.08025	5.08355	4.66798	4.65383
ENSMUSG00000041797	Abca9	7.44	7.32538	7.30814	6.1638	5.66186	6.23397	6.25865	5.97352	5.74359
ENSMUSG00000031974	Abcb10	6.6815	6.27185	6.54236	5.90735	6.36484	6.33429	6.59698	6.48343	6.70635
ENSMUSG00000027048	Abcb11	5.07719	5.02941	5.11316	5.03023	4.98432	4.75565	4.39067	4.34546	4.1448
ENSMUSG00000040584	Abcb1a	3.8024	4.35484	4.25013	4.35874	4.55669	4.34972	3.83799	3.64048	3.72604
ENSMUSG00000028970	Abcb1b	5.03644	5.01658	4.81318	6.05405	5.71712	5.61828	6.17165	5.93442	6.75006
ENSMUSG00000042476	Abcb4	4.6169	4.35057	4.6013	3.84692	4.27817	4.65271	4.77654	4.42109	4.74143
ENSMUSG00000072791	Abcb5	4.30414	4.25394	4.25035	4.62392	4.50442	4.49617	3.70752	3.96548	3.69982
ENSMUSG00000026198	Abcb6	6.9316	6.55299	6.6083	7.2051	7.33475	6.9922	6.81192	6.90198	7.20855
ENSMUSG00000031333	Abcb7	7.64484	7.02264	7.66641	7.54433	7.43912	7.57007	7.70894	7.70095	8.53863
ENSMUSG00000028973	Abcb8	4.8087	4.79037	5.07232	4.78011	4.85909	4.85012	5.38931	5.37258	5.59517
ENSMUSG00000029408	Abcb9	5.41825	5.46177	5.39012	5.6426	5.40575	5.66205	4.62185	4.66523	4.37174
ENSMUSG00000023088	Abcc1	9.75244	9.35385	9.64925	11.7386	11.7643	11.8189	11.5953	12.0681	12.7277
ENSMUSG00000032842	Abcc10	6.83678	6.61043	6.68871	6.58858	6.26701	6.61648	6.71921	7.07626	6.90555
ENSMUSG00000036872	Abcc12	4.6945	4.89478	5.0785	4.92688	5.29548	4.87976	4.29374	4.14268	4.34263
ENSMUSG00000025194	Abcc2	5.47609	5.41542	5.54218	5.13552	5.24498	5.27197	5.21134	5.07326	4.71184
ENSMUSG00000020865	Abcc3	7.45988	7.00214	7.42305	7.85882	7.97129	7.98669	8.22244	8.05559	8.46356
ENSMUSG00000032849	Abcc4	9.22677	9.13261	9.39475	9.05422	9.09118	9.18207	8.47848	8.64968	8.73506
ENSMUSG00000022822	Abcc5	10.1253	9.70106	10.1672	9.41008	9.6058	9.62076	8.51663	8.81301	9.12248
ENSMUSG00000030834	Abcc6	4.41585	4.65981	4.50057	4.6217	3.71597	4.49369	3.64094	3.7973	3.88717
ENSMUSG00000040136	Abcc8	5.5497	6.09762	5.57752	5.93508	5.67621	6.04308	5.48622	5.16509	5.13169
ENSMUSG00000030249	Abcc9	5.46445	5.17644	5.26258	5.31194	5.25016	5.47202	4.68293	4.9265	4.55283
ENSMUSG00000031378	Abcd1	9.46018	9.00581	9.36914	8.16553	8.27297	8.20752	8.45359	8.78348	8.5316
ENSMUSG00000055782	Abcd2	11.9073	12.0703	11.7773	10.9252	10.9416	10.7641	10.8331	10.8481	10.9844
ENSMUSG00000028127	Abcd3	7.29393	6.79916	7.13864	6.24486	6.56232	6.53388	6.32387	6.0847	6.55897
ENSMUSG00000021240	Abcd4	5.67377	5.21504	5.47514	5.5382	4.92366	5.4534	5.06674	5.02649	5.11105
ENSMUSG00000058355	Abce1	7.48616	6.93157	7.5561	7.49931	7.60095	7.55272	8.27342	8.19303	9.21299
ENSMUSG00000038762	Abcf1	8.75055	8.63845	8.57048	8.38535	8.538	8.44711	8.92442	8.91425	9.14056
ENSMUSG00000028953	Abcf2	7.50942	7.18096	7.41762	7.23397	7.41745	7.48548	8.24931	8.31492	8.68287
ENSMUSG00000003234	Abcf3	8.48828	8.61008	8.42928	8.31211	8.19131	8.01666	8.74318	8.96719	9.0802
ENSMUSG00000024030	Abcg1	7.19246	7.96518	7.13301	11.261	11.2431	11.1511	10.9025	10.8485	10.7935
ENSMUSG00000029802	Abcg2	5.82261	5.89947	5.93256	4.98995	5.60553	5.3649	5.21748	5.56638	5.84608
ENSMUSG00000029299	Abcg3	4.76963	4.46517	4.71763	4.03194	4.47679	4.4685	3.40265	3.43491	3.3531
ENSMUSG00000032131	Abcg4	4.62288	4.81737	4.5231	4.46435	4.40561	4.15494	4.33612	3.913	3.88666
ENSMUSG00000040505	Abcg5	3.8705	3.57223	3.73571	3.9947	3.89126	3.67728	3.57528	3.1473	2.94997
ENSMUSG00000024254	Abcg8	3.99547	3.58016	4.09654	3.84945	3.89216	3.66837	3.88391	3.55473	3.11196
ENSMUSG00000006638	Abhd1	9.42151	9.80678	9.56457	9.1209	9.23999	9.08468	10.036	10.3484	10.0602
ENSMUSG00000033157	Abhd10	6.71066	7.06863	6.5693	6.97068	6.60654	6.64518	6.51555	6.44884	6.54281
ENSMUSG00000040532	Abhd11	6.43729	6.45243	6.39629	6.42252	6.44887	6.43792	7.17704	7.15204	7.35927
ENSMUSG00000032046	Abhd12	7.20175	6.60031	6.82424	7.29805	7.32934	7.57235	8.10514	7.99219	8.76914
ENSMUSG00000090121	Abhd12b	7.86896	8.0781	8.09983	7.04708	7.1795	6.94516	7.36147	8.32726	7.45791
ENSMUSG00000040396	Abhd13	10.0274	10.2852	9.98289	9.37768	9.3443	9.15675	10.1458	10.1403	10.4945
ENSMUSG00000042210	Abhd14a	3.02825	2.86868	2.91718	2.69771	2.63795	3.12751	2.97848	2.86822	3.07432
ENSMUSG00000042073	Abhd14b	3.20899	3.16864	2.80279	2.76752	3.00052	2.69881	2.64542	2.58287	2.63814
ENSMUSG00000000686	Abhd15	9.83874	10.2228	9.66269	7.48198	7.33779	7.27858	9.16255	9.14151	8.80543
ENSMUSG00000007036	Abhd16a	8.23615	8.11925	7.93967	7.55224	7.58382	7.53474	8.20227	8.18312	8.40189
ENSMUSG00000055882	Abhd16b	2.38162	2.48669	2.4487	3.13359	2.36868	3.11601	2.60288	2.07001	1.98523
ENSMUSG00000003346	Abhd17a	7.86764	7.63241	7.43791	7.86899	7.71723	7.69727	7.93358	8.11809	8.30142
ENSMUSG00000047368	Abhd17b	7.7542	7.84257	7.71364	7.26293	7.058	7.11188	8.18838	8.1583	8.59384
ENSMUSG00000038459	Abhd17c	7.45523	7.31864	7.46125	6.62845	6.73351	6.70623	6.91848	7.37026	7.03503
ENSMUSG00000039202	Abhd2	11.4084	11.4427	11.3468	11.7513	11.7215	11.6157	11.2119	11.4841	11.231
ENSMUSG00000002475	Abhd3	3.17811	3.49064	3.37532	4.02682	3.85959	3.30871	3.08968	3.91625	3.60459
ENSMUSG00000040997	Abhd4	8.50965	8.94357	8.40275	8.82152	8.67574	8.83403	9.63483	9.73355	9.71262
ENSMUSG00000032540	Abhd5	10.4108	10.2926	10.2689	10.3653	10.3494	10.2685	9.8019	9.91071	10.0821
ENSMUSG00000025277	Abhd6	3.07673	3.43021	3.58861	3.36655	2.98868	3.4437	3.43155	3.22421	3.22811
ENSMUSG00000007950	Abhd8	4.65234	4.4052	4.25772	4.99814	5.20476	5.26798	5.67848	5.52807	5.81436
ENSMUSG00000058835	Abi1	11.5396	12.0146	11.4265	12.843	12.8341	12.7205	12.7711	12.8783	13.1576
ENSMUSG00000026782	Abi2	4.91126	4.80295	5.45073	5.93814	5.79055	6.18544	5.5672	5.05306	6.05753
ENSMUSG00000018381	Abi3	10.4955	10.5824	10.5491	10.558	10.5496	10.5592	11.2197	11.6319	10.8791
ENSMUSG00000035258	Abi3bp	5.11519	5.72228	5.44408	5.77948	5.57197	5.76733	5.83894	6.08752	5.97946
ENSMUSG00000026842	Abl1	8.68926	8.26926	8.55583	8.42119	8.65552	8.27323	8.86639	9.05255	8.97096
ENSMUSG00000026596	Abl2	8.32413	8.22407	8.15546	8.12585	8.19482	8.06218	8.76509	9.14376	9.09023
ENSMUSG00000025085	Ablim1	6.29818	6.01825	6.24935	6.14782	6.32302	6.25304	6.04497	5.75259	5.89766
ENSMUSG00000029095	Ablim2	5.0692	5.27915	5.38629	5.06993	5.10583	5.24494	4.85462	4.4195	4.73298
ENSMUSG00000032735	Ablim3	4.50061	4.36654	4.68341	4.94486	5.05446	4.71958	4.23157	4.17887	4.06738
ENSMUSG00000015787	Abo	2.32788	2.62872	2.46763	2.36065	2.52997	2.6241	2.38583	2.23138	2.17588
ENSMUSG00000017631	Abr	12.445	12.9609	12.3515	11.4804	11.474	11.6227	14.2837	14.3845	14.2735
ENSMUSG00000042895	Abra	3.81547	3.72538	4.0499	3.17235	3.50202	3.49585	3.78395	3.99913	3.95584
ENSMUSG00000078453	Abracl	8.33615	8.4747	8.28591	7.28347	7.36603	7.13206	7.88695	7.88128	8.50963
ENSMUSG00000036376	Abt1	5.91724	6.03949	5.91495	6.01474	6.02061	5.95982	6.70178	6.54139	7.00313
ENSMUSG00000030083	Abtb1	11.9236	11.7557	11.7017	11.4363	11.4474	11.3137	12.0013	11.9024	11.9554
ENSMUSG00000032724	Abtb2	10.2162	10.5799	10.0256	11.0445	11.0011	10.9702	11.6958	11.9056	11.9359
ENSMUSG00000099247	AC025913.1	0.748275	0.460657	0.597438	1.12029	0.67643	0.820511	0.596233	0.722278	0.620983
ENSMUSG00000098384	AC084822.1	0	0	0	0	0	0	0	0	0
ENSMUSG00000099028	AC084822.2	0	0	0	0	0	0	0	0	0
ENSMUSG00000079764	AC087559.1	0	0	0	0	0	0	0	0	0
ENSMUSG00000096416	AC087559.2	0	0	0	0	0	0	0	0	0
ENSMUSG00000098695	AC087902.1	0	0	0	0	0	0	0	0	0
ENSMUSG00000098898	AC091763.1	0.0791257	0.308398	0.225597	0.196009	0.0198041	0.17651	-0.0104047	-0.00780279	0.363
ENSMUSG00000099251	AC096625.1	2.94909	2.73662	3.28188	2.54697	2.7137	2.22146	2.37913	2.99725	2.34585
ENSMUSG00000098852	AC100386.1	1.10266	0.912417	1.27915	1.59758	1.65966	1.14795	1.05178	1.28994	1.32343
ENSMUSG00000099114	AC102738.1	0	0	0	0	0	0	0	0	0
ENSMUSG00000099211	AC102758.1	-1.85648	-1.78023	-1.84693	-1.82577	-1.83038	-1.8307	-1.84718	-1.8457	-1.77245
ENSMUSG00000098402	AC107236.1	-0.790877	-0.784105	-0.781232	-0.747439	-0.457299	-0.758384	-0.440183	-0.651626	-0.775953
ENSMUSG00000099314	AC107769.1	-1.8556	-1.84902	-1.71143	-1.82579	-1.83026	-1.83057	-1.84657	-1.84513	-1.84147
ENSMUSG00000097512	AC109138.1	0	0	0	0	0	0	0	0	0
ENSMUSG00000097556	AC109138.2	0	0	0	0	0	0	0	0	0
ENSMUSG00000097663	AC109138.3	0	0	0	0	0	0	0	0	0
ENSMUSG00000098777	AC109210.1	-2.15903	-2.15536	-2.15385	-2.14238	-2.14488	-2.14505	-2.11631	-2.15318	-2.15114
ENSMUSG00000099113	AC110575.1	0.821035	0.610711	0.627338	0.760124	0.730638	0.586494	0.388083	0.391655	0.535886
ENSMUSG00000099177	AC110903.1	3.37791	3.37654	2.98163	2.9351	3.59769	3.65982	2.89684	3.75317	3.14997
ENSMUSG00000098815	AC112986.1	0	0	0	0	0	0	0	0	0
ENSMUSG00000098345	AC113095.1	-1.47497	-1.46125	-1.5588	-1.42625	-1.5346	-1.53506	-1.55918	-1.557	-1.55149
ENSMUSG00000098722	AC113593.1	-1.86191	-1.85392	-1.85064	-1.8257	-1.83113	-1.74957	-1.76901	-1.8492	-1.84475
ENSMUSG00000099086	AC113593.2	-1.85462	-1.78305	-1.84565	-1.8258	-1.83012	-1.83042	-1.78068	-1.8445	-1.84096
ENSMUSG00000098622	AC113989.1	-2.16523	-2.15969	-2.15742	-2.14014	-2.08716	-2.14417	-2.15763	-2.15642	-2.15334
ENSMUSG00000098303	AC114591.1	0	0	0	0	0	0	0	0	0
ENSMUSG00000098507	AC116451.1	-1.03674	-0.811045	-0.907926	-0.857827	-1.00287	-1.0035	-0.908669	-1.02826	-1.02514
ENSMUSG00000098356	AC117796.1	0	0	0	0	0	0	0	0	0
ENSMUSG00000098965	AC117796.2	0	0	0	0	0	0	0	0	0
ENSMUSG00000098636	AC118710.1	-0.967912	-0.848612	-1.05981	-1.02526	-0.903696	-1.03449	-1.06	-0.938968	-1.05553
ENSMUSG00000098867	AC118710.2	-1.79302	-1.78728	-1.84374	-1.82584	-1.82974	-1.83001	-1.84396	-1.84271	-1.83951
ENSMUSG00000098350	AC119268.1	0.654306	0.792409	0.539722	0.353832	0.499119	0.342862	0.306604	0.74395	0.317971
ENSMUSG00000098652	AC119853.1	5.13715	5.0208	4.7684	4.90798	5.6486	4.96579	5.55187	5.82778	5.84989
ENSMUSG00000098814	AC120404.1	1.73832	1.99931	1.70995	2.02809	2.11313	2.10963	2.49421	2.51892	2.58222
ENSMUSG00000098476	AC121131.1	0	0	0	0	0	0	0	0	0
ENSMUSG00000098798	AC121131.2	0	0	0	0	0	0	0	0	0
ENSMUSG00000099183	AC121538.1	2.46279	2.50279	2.47308	2.36778	2.31538	2.42567	2.31006	2.49123	2.46632
ENSMUSG00000099224	AC121784.1	-1.47466	-1.56426	-1.56011	-1.42476	-1.5354	-1.53587	-1.56049	-1.45451	-1.55264
ENSMUSG00000098409	AC121988.1	-0.936142	-0.802139	-0.926322	-0.580324	-0.74461	-0.899387	-0.794214	-0.925022	-0.920994
ENSMUSG00000098694	AC122290.1	0	0	0	0	0	0	0	0	0
ENSMUSG00000099191	AC122877.1	-2.1673	-2.16114	-2.15862	-2.07627	-2.14358	-2.14387	-2.15885	-2.1575	-2.15407
ENSMUSG00000098281	AC123611.1	-0.141948	-0.239975	-0.108577	-0.201485	-0.208951	-0.20947	0.450581	-0.233702	0.0334307
ENSMUSG00000094383	AC123873.1	0	0	0	0	0	0	0	0	0
ENSMUSG00000098560	AC124170.1	0	0	0	0	0	0	0	0	0
ENSMUSG00000098665	AC124193.1	-1.85543	-1.84889	-1.8462	-1.82579	-1.83023	-1.83054	-1.71234	-1.84502	-1.84138
ENSMUSG00000098983	AC124326.1	-0.408408	-0.508392	-0.377251	-0.3034	-0.482597	-0.175361	-0.505126	-0.50318	-0.235957
ENSMUSG00000099127	AC124584.1	2.75023	2.93518	2.76016	2.77217	3.28934	3.02454	3.17041	3.36559	3.21145
ENSMUSG00000095763	AC124606.1	0	0	0	0	0	0	0	0	0
ENSMUSG00000098803	AC125059.1	2.84182	2.23733	2.49937	2.10202	2.41137	2.29894	1.99891	2.11476	1.68486
ENSMUSG00000079192	AC125149.1	0	0	0	0	0	0	0	0	0
ENSMUSG00000079794	AC125149.2	0	0	0	0	0	0	0	0	0
ENSMUSG00000094799	AC125149.3	0	0	0	0	0	0	0	0	0
ENSMUSG00000095092	AC125149.4	0	0	0	0	0	0	0	0	0
ENSMUSG00000095076	AC125178.1	0	0	0	0	0	0	0	0	0
ENSMUSG00000095728	AC125178.2	0	0	0	0	0	0	0	0	0
ENSMUSG00000098742	AC125259.1	-1.0256	-0.811277	-1.11883	-1.08313	-1.09164	-0.963864	-1.11901	-1.11793	-1.11297
ENSMUSG00000098700	AC125320.1	0	0	0	0	0	0	0	0	0
ENSMUSG00000094791	AC126035.1	0	0	0	0	0	0	0	0	0
ENSMUSG00000099268	AC126053.1	-0.126874	-0.000622454	-0.0953598	-0.0194843	-0.191164	-0.0375432	-0.0962438	-0.091143	-0.0779869
ENSMUSG00000099144	AC127339.1	2.97996	3.22871	3.09359	3.32199	3.32572	2.93943	3.21889	3.47564	3.50212
ENSMUSG00000098542	AC129590.1	0.594439	0.403885	0.850987	0.785407	0.755629	0.451803	0.649557	0.413767	0.793795
ENSMUSG00000098403	AC130815.1	5.37402	5.45908	5.13743	5.57932	5.16481	5.42588	6.12139	6.73019	6.25832
ENSMUSG00000098916	AC131103.1	-0.067206	-0.221186	-0.212236	-0.3024	-0.308571	-0.157017	-0.213077	-0.208224	-0.195692
ENSMUSG00000098819	AC131701.1	-0.918967	-1.10372	-0.877367	-1.06658	-0.946656	-1.07568	-1.10192	-1.10084	-1.09644
ENSMUSG00000098883	AC132241.1	-2.16075	-2.15656	-2.15484	-2.14176	-2.14461	-2.1448	-2.155	-2.15408	-2.10878
ENSMUSG00000079222	AC132444.1	0	0	0	0	0	0	0	0	0
ENSMUSG00000094728	AC132444.2	0	0	0	0	0	0	0	0	0
ENSMUSG00000094874	AC132444.3	0	0	0	0	0	0	0	0	0
ENSMUSG00000095450	AC132444.4	0	0	0	0	0	0	0	0	0
ENSMUSG00000095500	AC132444.5	0	0	0	0	0	0	0	0	0
ENSMUSG00000096808	AC132444.6	0	0	0	0	0	0	0	0	0
ENSMUSG00000097866	AC132586.1	0	0	0	0	0	0	0	0	0
ENSMUSG00000098514	AC132591.1	-0.923806	-0.917117	-0.91429	-0.877346	-0.446606	-0.88813	-0.914555	-0.779927	-0.767944
ENSMUSG00000098259	AC132867.1	1.89176	1.65933	2.17519	2.12849	2.07879	1.94743	2.17169	2.6625	2.15449
ENSMUSG00000098745	AC132878.1	0	0	0	0	0	0	0	0	0
ENSMUSG00000098901	AC132878.2	0	0	0	0	0	0	0	0	0
ENSMUSG00000099022	AC132878.3	-1.48001	-1.55783	-1.55423	-1.52683	-1.53279	-1.53321	-1.55457	-1.46263	-1.45774
ENSMUSG00000094855	AC133095.1	0	0	0	0	0	0	0	0	0
ENSMUSG00000095475	AC133095.2	0	0	0	0	0	0	0	0	0
ENSMUSG00000079190	AC133103.1	0	0	0	0	0	0	0	0	0
ENSMUSG00000094054	AC133103.2	0	0	0	0	0	0	0	0	0
ENSMUSG00000094514	AC133103.3	0	0	0	0	0	0	0	0	0
ENSMUSG00000095250	AC133103.4	0	0	0	0	0	0	0	0	0
ENSMUSG00000095672	AC133103.5	0	0	0	0	0	0	0	0	0
ENSMUSG00000095787	AC133103.6	0	0	0	0	0	0	0	0	0
ENSMUSG00000096100	AC133103.7	0	0	0	0	0	0	0	0	0
ENSMUSG00000098565	AC133283.1	-0.784605	-0.558489	-0.775716	-0.743612	-0.753528	-0.604662	-0.775965	-0.651029	-0.52105
ENSMUSG00000099282	AC133487.1	0	0	0	0	0	0	0	0	0
ENSMUSG00000099014	AC135509.1	-1.26278	-1.25852	-1.25641	-1.21945	-1.2275	-1.10669	-1.13853	-1.02478	-1.24767
ENSMUSG00000098703	AC137947.1	-2.15903	-2.15536	-2.15385	-2.14238	-2.14488	-2.14505	-2.11631	-2.15318	-2.15114
ENSMUSG00000099265	AC138368.1	2.8868	2.88531	2.78884	2.44055	3.313	2.5243	2.99701	3.41525	3.22353
ENSMUSG00000074720	AC140325.1	0	0	0	0	0	0	0	0	0
ENSMUSG00000095570	AC140325.2	0	0	0	0	0	0	0	0	0
ENSMUSG00000096728	AC140325.3	0	0	0	0	0	0	0	0	0
ENSMUSG00000098481	AC140331.1	-0.624626	-0.69858	-0.690345	-0.778904	-0.788703	-0.499858	-0.811771	-0.810363	-0.806735
ENSMUSG00000091585	AC140365.1	0	0	0	0	0	0	0	0	0
ENSMUSG00000098770	AC141640.1	-2.15827	-2.11948	-2.15341	-2.14265	-2.14499	-2.14516	-2.15354	-2.15279	-2.15087
ENSMUSG00000098268	AC142191.1	1.83926	2.14595	1.76553	1.53332	1.50873	1.6616	2.18253	2.4607	2.01291
ENSMUSG00000098733	AC144797.1	1.66205	1.90303	1.84742	1.96223	1.91574	1.78654	2.09127	1.95036	1.80068
ENSMUSG00000098868	AC144854.1	0	0	0	0	0	0	0	0	0
ENSMUSG00000099228	AC144854.2	0	0	0	0	0	0	0	0	0
ENSMUSG00000098799	AC146604.1	-1.48182	-1.55602	-1.38092	-1.52645	-1.53214	-1.53254	-1.55291	-1.55107	-1.54641
ENSMUSG00000098820	AC147101.1	-0.615254	-0.495733	-0.704492	-0.674808	-0.68463	-0.685309	-0.48406	-0.477066	-0.699741
ENSMUSG00000098821	AC147224.1	-1.86191	-1.85392	-1.85064	-1.8257	-1.83113	-1.74957	-1.76901	-1.8492	-1.84475
ENSMUSG00000095041	AC149090.1	0	0	0	0	0	0	0	0	0
ENSMUSG00000098440	AC152063.1	0	0	0	0	0	0	0	0	0
ENSMUSG00000099067	AC152063.2	0	0	0	0	0	0	0	0	0
ENSMUSG00000098618	AC152827.1	-0.829925	-0.705819	-0.484187	-0.637731	-0.797321	-0.798007	-0.821177	-0.693712	-0.815981
ENSMUSG00000098864	AC153582.1	-1.308	-1.3043	-0.993206	-1.26679	-1.27429	-1.27481	-1.30165	-1.29923	-1.17998
ENSMUSG00000098993	AC153847.1	-0.530235	-0.406968	-0.62153	-0.591789	-0.448676	-0.602887	-0.621802	-0.387723	-0.486268
ENSMUSG00000098653	AC153944.1	1.28199	1.23846	1.2585	1.55254	1.5104	1.3796	1.36039	1.56048	1.17324
ENSMUSG00000099004	AC154413.1	-1.79125	-1.84716	-1.84468	-1.82582	-1.82993	-1.83021	-1.84491	-1.78163	-1.84022
ENSMUSG00000098283	AC154679.1	0	0	0	0	0	0	0	0	0
ENSMUSG00000098472	AC154801.1	-1.09261	-0.784715	-1.08606	-1.05152	-1.05999	-1.06058	-1.08624	-1.08518	-0.841355
ENSMUSG00000099215	AC158354.1	-1.55277	-1.44351	-1.54088	-1.51	-1.51672	-1.41576	-1.43983	-1.53908	-1.53358
ENSMUSG00000099088	AC158802.1	2.48316	2.17637	2.21214	2.12568	1.78862	2.52621	2.02225	2.60309	2.52556
ENSMUSG00000098903	AC158942.1	-1.56043	-1.55139	-1.5468	-1.51184	-1.28981	-1.51998	-1.54723	-1.42995	-1.53854
ENSMUSG00000098589	AC158997.1	6.44665	6.80001	6.8072	5.60488	5.42273	5.77403	6.01631	6.40697	5.8186
ENSMUSG00000099074	AC159200.1	1.42524	1.81677	1.50925	1.70642	1.39407	1.65972	1.60243	1.70765	1.18782
ENSMUSG00000098728	AC159305.1	0.313898	0.463265	0.340037	0.885662	0.973084	0.844619	0.475172	0.343458	0.500331
ENSMUSG00000098378	AC161214.1	0.577782	0.507867	0.393804	0.615882	0.738304	0.86568	0.632662	0.525386	0.665037
ENSMUSG00000098594	AC161410.1	-1.55829	-1.34186	-1.54593	-1.40934	-1.52099	-1.52147	-1.54632	-1.54408	-1.53839
ENSMUSG00000099089	AC161571.1	-1.06889	-0.948204	-0.73071	-1.0258	-0.900595	-1.03531	-1.0618	-1.06062	-1.05698
ENSMUSG00000094172	AC163611.1	0	0	0	0	0	0	0	0	0
ENSMUSG00000095556	AC163993.1	3.21351	3.49811	3.36085	3.28153	3.36763	3.28042	2.82531	3.007	2.62489
ENSMUSG00000095666	AC164084.1	0	0	0	0	0	0	0	0	0
ENSMUSG00000096680	AC164084.2	0	0	0	0	0	0	0	0	0
ENSMUSG00000098452	AC164297.1	-1.48148	-1.55637	-1.46627	-1.52653	-1.53227	-1.53267	-1.55322	-1.46474	-1.54667
ENSMUSG00000099233	AC164558.1	-0.890694	-1.07351	-0.95487	-1.03706	-1.0456	-0.917443	-1.0717	-0.951465	-1.06699
ENSMUSG00000099299	AC164609.1	1.15812	0.884553	1.09584	1.04119	0.716774	0.715853	0.900315	0.90972	0.933922
ENSMUSG00000098740	AC165087.1	-0.0782005	0.170097	0.292147	0.153099	0.134516	0.412579	-0.0614036	-0.0586384	-0.0515499
ENSMUSG00000094303	AC165294.1	0	0	0	0	0	0	0	0	0
ENSMUSG00000096236	AC165294.2	0	0	0	0	0	0	0	0	0
ENSMUSG00000096756	AC165294.3	0	0	0	0	0	0	0	0	0
ENSMUSG00000099204	AC166150.1	2.28648	2.15942	2.00873	2.24001	2.60303	2.18559	2.27463	2.21056	2.2594
ENSMUSG00000098911	AC166333.1	0	0	0	0	0	0	0	0	0
ENSMUSG00000099285	AC166813.1	-2.1673	-2.16114	-2.15862	-2.07627	-2.14358	-2.14387	-2.15885	-2.1575	-2.15407
ENSMUSG00000098842	AC167036.1	0.0823895	0.0954689	0.447478	0.468803	0.296035	0.294703	0.226935	0.232883	0.371812
ENSMUSG00000098494	AC167724.1	-0.452235	-0.441179	-0.436553	-0.215724	0.0662708	0.0638791	-0.436986	-0.434498	-0.42815
ENSMUSG00000079808	AC168977.1	0	0	0	0	0	0	0	0	0
ENSMUSG00000094915	AC168977.2	0	0	0	0	0	0	0	0	0
ENSMUSG00000099303	AC170257.1	-1.85601	-1.84934	-1.77821	-1.82578	-1.83031	-1.83063	-1.84686	-1.77701	-1.84168
ENSMUSG00000098757	AC171335.1	-0.918627	-1.02047	-0.776283	-0.838165	-0.847631	-0.991063	-1.01822	-1.01688	-1.01344
ENSMUSG00000098307	AC175117.1	0	0	0	0	0	0	0	0	0
ENSMUSG00000098835	AC182748.1	0	0	0	0	0	0	0	0	0
ENSMUSG00000098966	AC201846.1	0	0	0	0	0	0	0	0	0
ENSMUSG00000097238	AC212990.1	0	0	0	0	0	0	0	0	0
ENSMUSG00000097499	AC217111.1	0	0	0	0	0	0	0	0	0
ENSMUSG00000097528	AC233742.1	0	0	0	0	0	0	0	0	0
ENSMUSG00000097802	AC233742.2	0	0	0	0	0	0	0	0	0
ENSMUSG00000095019	AC234645.1	0	0	0	0	0	0	0	0	0
ENSMUSG00000097389	AC240971.1	0	0	0	0	0	0	0	0	0
ENSMUSG00000097510	AC240971.2	0	0	0	0	0	0	0	0	0
ENSMUSG00000097741	AC242685.1	0	0	0	0	0	0	0	0	0
ENSMUSG00000097765	AC243554.1	0	0	0	0	0	0	0	0	0
ENSMUSG00000099217	AC244694.1	0	0	0	0	0	0	0	0	0
ENSMUSG00000097395	AC244695.1	0	0	0	0	0	0	0	0	0
ENSMUSG00000097490	AC244695.2	0	0	0	0	0	0	0	0	0
ENSMUSG00000097570	AC244695.3	0	0	0	0	0	0	0	0	0
ENSMUSG00000097611	AC244695.4	0	0	0	0	0	0	0	0	0
ENSMUSG00000097607	AC245272.1	0	0	0	0	0	0	0	0	0
ENSMUSG00000098584	AC245272.2	0	0	0	0	0	0	0	0	0
ENSMUSG00000099121	AC245272.3	0	0	0	0	0	0	0	0	0
ENSMUSG00000036138	Acaa1a	8.90544	8.84616	8.97138	8.9385	8.90244	8.77098	10.1686	10.4206	10.5495
ENSMUSG00000010651	Acaa1b	3.02503	2.76777	2.94479	2.58275	2.84695	2.9342	2.94005	2.33335	2.26864
ENSMUSG00000036880	Acaa2	6.40553	6.03148	5.98675	6.5467	6.37099	6.50643	6.44291	6.34812	6.59063
ENSMUSG00000020532	Acaca	7.39693	7.07783	7.35796	6.97197	6.98311	7.10109	7.31587	7.56665	7.65197
ENSMUSG00000042010	Acacb	5.14765	5.51553	5.46984	5.42636	5.21367	5.73261	5.21685	4.92867	4.63196
ENSMUSG00000029456	Acad10	5.94867	6.15364	5.85949	5.50508	5.63568	6.06901	5.7096	5.77716	5.90186
ENSMUSG00000090150	Acad11	8.43807	8.22345	8.29828	6.30041	6.43614	6.59682	6.99516	7.08255	7.12508
ENSMUSG00000042647	Acad12	6.22004	6.26994	6.20239	5.26958	5.47198	5.24506	4.98293	5.28337	5.08129
ENSMUSG00000031969	Acad8	7.067	6.61031	6.94875	6.16029	6.10677	6.23339	6.68944	6.58517	6.71773
ENSMUSG00000027710	Acad9	6.38928	6.19181	6.32743	6.8173	6.83632	7.0311	6.21097	6.14515	6.50133
ENSMUSG00000026003	Acadl	6.76514	6.79216	6.91912	7.13817	7.4022	6.87908	7.40428	8.01074	7.5774
ENSMUSG00000062908	Acadm	7.9703	7.79166	7.6743	6.633	6.54963	6.82323	7.05677	7.0017	7.61814
ENSMUSG00000029545	Acads	5.79897	5.9712	5.63044	7.01689	7.05663	6.73215	6.33614	6.31003	6.45421
ENSMUSG00000030861	Acadsb	9.21597	9.26612	9.16851	7.93644	8.00233	7.9012	9.09687	9.30806	9.65686
ENSMUSG00000018574	Acadvl	8.49779	8.73857	8.33395	9.08092	9.04741	8.76866	8.99858	8.94843	9.17357
ENSMUSG00000030607	Acan	4.28792	4.80392	4.55188	4.34638	4.77309	4.80809	4.61195	4.39939	4.17897
ENSMUSG00000001588	Acap1	12.0911	12.1371	11.9684	10.7611	10.7426	10.5325	11.4866	11.3147	11.1801
ENSMUSG00000049076	Acap2	11.9286	12.246	11.9028	11.9688	11.9279	11.8562	12.3926	12.539	12.6065
ENSMUSG00000029033	Acap3	9.19043	8.79326	9.07936	7.00316	7.24771	7.17598	7.38431	7.5959	7.39989
ENSMUSG00000032047	Acat1	6.74502	6.28626	6.68648	5.69432	6.2303	5.82314	6.45648	6.37563	7.03575
ENSMUSG00000023832	Acat2	5.72422	5.57514	5.68988	6.40725	6.67372	6.76886	7.00846	7.01457	7.54188
ENSMUSG00000062480	Acat3	5.77995	5.13299	5.54207	5.84483	5.86743	6.05584	6.29476	6.24335	7.11166
ENSMUSG00000026499	Acbd3	9.18277	9.39578	9.20381	9.64059	9.53314	9.58018	9.67549	9.84783	9.98897
ENSMUSG00000056938	Acbd4	6.05568	6.12784	6.08382	8.15625	7.99969	8.18848	7.27222	7.22719	7.55695
ENSMUSG00000026781	Acbd5	9.90012	10.5342	9.9495	10.8127	10.7625	10.6653	11.5532	11.6064	11.7645
ENSMUSG00000033701	Acbd6	6.43295	5.92885	6.02207	5.2857	6.06871	5.5824	5.4758	5.45566	5.85375
ENSMUSG00000026644	Acbd7	0.281747	0.516531	0.319414	0.408425	0.532082	0.530129	0.318364	0.19647	0.33998
ENSMUSG00000040272	Accs	5.73118	5.66378	5.6271	5.62216	5.57582	5.76664	5.59944	5.39008	5.30321
ENSMUSG00000075023	Accsl	4.0916	4.08765	4.15857	4.23826	3.78407	4.39489	3.98287	3.59021	3.38415
ENSMUSG00000038000	Acd	5.83736	5.57848	5.85529	5.71913	5.97252	5.62765	6.43459	6.3584	6.57094
ENSMUSG00000020681	Ace	4.3448	4.43808	4.41221	4.58472	4.30256	4.23542	4.08573	4.1235	3.57019
ENSMUSG00000015405	Ace2	4.80455	5.64459	5.13795	4.59534	4.4749	4.52341	4.28046	4.44852	4.27925
ENSMUSG00000098427	ACE3	3.72593	3.80309	3.82342	3.48199	3.65314	3.92692	3.8627	3.53576	3.41802
ENSMUSG00000098551	Ace3	3.72593	3.80309	3.82342	3.48199	3.65314	3.92692	3.8627	3.53576	3.41802
ENSMUSG00000098921	ACEA_U3	0	0	0	0	0	0	0	0	0
ENSMUSG00000098943	ACEA_U3	1.14388	1.08175	1.40756	1.0512	1.18965	1.32769	1.49245	1.41952	1.6364
ENSMUSG00000099291	ACEA_U3	-0.454704	-0.550304	-0.425351	-0.51744	-0.370451	-0.371536	-0.316476	-0.545717	-0.409178
ENSMUSG00000045019	Acer1	3.57445	3.77569	3.84127	3.86956	3.83909	3.69164	3.5333	3.16412	3.38794
ENSMUSG00000091609	Acer2	3.53992	3.55013	3.76053	3.676	3.929	3.79398	3.37705	3.63977	2.71408
ENSMUSG00000038007	Acer2	5.26599	5.40294	5.47076	5.58014	5.43906	5.28951	5.41999	5.61063	5.37359
ENSMUSG00000030760	Acer3	7.41572	7.05484	7.25555	7.71208	7.87745	7.83587	8.4155	8.50441	8.81439
ENSMUSG00000023328	Ache	4.97667	4.79923	4.63183	4.10499	4.07068	4.25895	3.85456	4.18925	3.73293
ENSMUSG00000022185	Acin1	11.0506	10.9983	11.0247	10.4257	10.6863	10.5106	11.0579	11.2717	11.1218
ENSMUSG00000044534	Ackr2	3.58319	3.60636	3.71721	4.04774	3.17471	3.74716	3.05295	2.99876	3.22963
ENSMUSG00000044337	Ackr3	3.38747	3.43959	3.33037	3.63293	4.13929	3.6056	2.61468	2.73885	2.98891
ENSMUSG00000041748	Ackr4	5.94968	5.45325	5.8602	4.79255	4.49445	4.48596	4.39016	4.51654	4.44684
ENSMUSG00000079355	Ackr4	4.93618	4.56537	4.6431	3.34568	4.0523	3.97576	3.77623	3.81175	3.65019
ENSMUSG00000020917	Acly	10.9063	10.7262	10.7903	9.65928	9.64646	9.63672	10.7916	10.7495	10.9762
ENSMUSG00000026348	Acmsd	3.64033	4.07374	3.31214	3.65965	3.79659	3.78972	3.49919	3.64602	3.73044
ENSMUSG00000042505	Acn9	4.14824	4.56858	4.11093	4.85858	4.86109	4.76863	4.05601	4.32083	4.08568
ENSMUSG00000070985	Acnat1	2.94713	2.9474	2.99723	3.46271	3.13477	3.29509	2.99257	3.01942	2.67571
ENSMUSG00000060317	Acnat2	3.06186	3.25626	2.74059	3.95154	3.59918	3.28862	2.9819	2.76055	2.9133
ENSMUSG00000028405	Aco1	7.22361	7.04436	6.93454	6.45286	6.54893	6.00105	6.82941	6.6664	7.02585
ENSMUSG00000022477	Aco2	9.11521	9.0366	8.99857	8.70655	8.95996	8.8699	9.51133	9.45975	9.81649
ENSMUSG00000072949	Acot1	5.44049	5.5438	5.54192	6.06111	5.88896	5.94594	4.0847	3.66409	3.90871
ENSMUSG00000047565	Acot10	2.97749	3.22174	3.02941	3.42486	3.07802	2.86841	3.09149	2.82405	3.49114
ENSMUSG00000034853	Acot11	6.22647	5.82945	6.24578	5.46221	5.24096	5.45797	5.81418	6.0854	6.07335
ENSMUSG00000021620	Acot12	3.63954	3.96436	4.03308	3.8216	3.86515	3.78955	3.43639	3.10477	3.48138
ENSMUSG00000006717	Acot13	5.63261	5.74058	5.69847	6.43509	6.5089	6.36852	7.0761	7.02397	7.16636
ENSMUSG00000021226	Acot2	4.64699	4.7158	4.2562	4.96168	5.02409	4.64922	3.80476	3.58157	3.34123
ENSMUSG00000021228	Acot3	3.385	3.62709	3.31634	3.33073	3.42702	3.84508	3.42971	3.4026	2.95721
ENSMUSG00000052392	Acot4	2.63477	2.75314	2.67336	2.76544	2.87549	2.10165	2.36072	2.28885	2.12135
ENSMUSG00000042540	Acot5	1.27298	1.34144	1.28375	1.08814	0.908982	1.20074	0.97548	0.98307	1.33128
ENSMUSG00000043487	Acot6	3.96164	3.59748	4.20274	3.68086	3.75354	4.25602	3.59579	4.26947	3.7703
ENSMUSG00000028937	Acot7	8.51897	8.71913	8.38089	6.84959	6.61622	6.82229	6.98335	6.99317	7.32305
ENSMUSG00000017307	Acot8	7.34071	7.23933	7.12324	7.67561	7.21585	7.59656	7.70237	7.79696	7.85463
ENSMUSG00000025287	Acot9	9.60377	9.99896	9.63703	9.62328	9.43324	9.47301	9.96968	10.1019	10.3965
ENSMUSG00000020777	Acox1	8.99471	8.64945	8.87753	9.11123	8.8789	8.9042	8.91415	8.90241	9.14199
ENSMUSG00000021751	Acox2	4.20131	3.87676	4.08229	4.16183	3.75999	3.97973	4.38308	4.02225	4.33595
ENSMUSG00000029098	Acox3	10.945	10.7939	10.7946	10.3674	10.3668	10.3096	10.855	10.9889	10.7894
ENSMUSG00000027380	Acoxl	4.6938	4.6464	4.54032	5.49898	5.29061	5.75142	5.18726	5.13085	5.49189
ENSMUSG00000044573	Acp1	6.0083	5.53117	5.82641	5.4272	5.98845	5.80015	5.81783	6.05928	6.14037
ENSMUSG00000002103	Acp2	7.87646	7.57735	7.74069	8.90076	9.05835	9.23512	8.43321	8.57516	9.23126
ENSMUSG00000001348	Acp5	4.27556	4.12791	4.08904	8.98329	9.16432	9.33548	6.57213	6.88517	8.63882
ENSMUSG00000028093	Acp6	5.61402	5.25279	5.34041	5.77158	5.40741	5.4963	5.23609	5.28263	5.52183
ENSMUSG00000043587	Acpl2	8.79111	8.12267	8.61433	7.49021	7.30118	7.33368	7.50286	7.29958	7.17146
ENSMUSG00000032561	Acpp	10.5965	10.4057	10.5904	10.1177	10.2003	10.1516	8.9499	9.05474	9.18594
ENSMUSG00000012777	Acpt	3.82519	3.86572	3.97665	3.73641	3.64262	3.36472	4.01281	4.13085	3.95818
ENSMUSG00000022622	Acr	2.72653	3.24256	2.89363	3.00563	2.83125	3.3364	2.388	2.84365	2.56
ENSMUSG00000072770	Acrbp	8.27889	8.76331	8.21215	8.05104	8.42841	8.26919	9.19003	9.18307	9.0378
ENSMUSG00000032110	Acrv1	4.29109	3.99659	4.42167	4.26285	4.48915	4.52953	3.91599	3.53345	4.04513
ENSMUSG00000032281	Acsbg1	4.57565	4.39332	4.29941	3.55076	3.8909	3.55294	4.0546	4.17702	3.82674
ENSMUSG00000024207	Acsbg2	3.20866	2.62906	2.67423	3.11837	3.27124	2.63973	2.74607	2.43031	2.0031
ENSMUSG00000076435	Acsf2	4.51434	3.98668	4.45678	5.50574	5.14621	4.73772	4.15121	4.19057	4.47388
ENSMUSG00000015016	Acsf3	3.43834	3.4863	3.99669	3.48919	3.48845	3.3054	3.1646	3.57353	3.81448
ENSMUSG00000018796	Acsl1	11.8365	11.3636	11.8226	9.21531	9.21517	9.25937	9.82639	9.77756	9.83004
ENSMUSG00000032883	Acsl3	6.16887	5.52712	5.87021	5.61661	5.93329	5.84189	6.73088	6.70822	7.23878
ENSMUSG00000031278	Acsl4	9.12338	8.69811	9.13012	9.51634	9.54916	9.65923	9.26361	9.58989	10.2246
ENSMUSG00000024981	Acsl5	9.82309	9.47761	9.61014	10.8018	10.819	10.888	10.1821	10.4031	11.1533
ENSMUSG00000020333	Acsl6	5.4089	4.8835	5.07462	5.22531	5.01019	5.42656	4.74552	4.44897	4.50989
ENSMUSG00000033533	Acsm1	2.59015	2.9184	3.03573	3.0882	3.01208	3.55003	2.96381	3.12306	2.73318
ENSMUSG00000030945	Acsm2	4.9564	5.16698	4.91443	5.65093	5.64785	5.76373	4.90661	4.04547	3.8851
ENSMUSG00000030935	Acsm3	5.09741	4.8731	5.29095	4.76164	4.34312	4.68119	4.67429	4.61065	5.18537
ENSMUSG00000047026	Acsm4	3.09957	3.28983	3.45107	3.5959	3.09237	3.17934	2.96637	2.65668	2.89835
ENSMUSG00000030972	Acsm5	3.70502	3.91091	3.89184	4.12951	4.19432	3.95234	3.39442	3.35678	3.10718
ENSMUSG00000027452	Acss1	5.55054	5.15701	5.35787	5.41901	4.86271	5.11936	5.08273	5.07292	5.44648
ENSMUSG00000027605	Acss2	8.65923	7.76602	8.61492	8.46082	8.30072	8.41883	7.32873	7.39723	7.42716
ENSMUSG00000035948	Acss3	3.51215	3.56413	3.44892	3.91016	4.06754	4.4605	3.67539	3.70968	2.99331
ENSMUSG00000031972	Acta1	2.2574	2.74125	2.47641	2.78668	3.30165	2.71377	2.91536	2.49412	2.54883
ENSMUSG00000035783	Acta2	10.5459	10.8377	10.4136	9.16237	9.09844	9.23541	11.1388	11.0725	11.6261
ENSMUSG00000029580	Actb	17.1648	17.3344	16.9597	16.3626	16.4049	16.3328	17.177	17.044	17.2394
ENSMUSG00000055194	Actbl2	3.16441	3.08292	3.00567	3.55338	3.14461	2.84216	2.77577	2.88059	3.16705
ENSMUSG00000068614	Actc1	2.99141	3.12474	3.28859	2.70656	3.15104	3.51164	2.69696	2.54023	2.37743
ENSMUSG00000062825	Actg1	11.2349	11.2753	10.9192	10.5408	10.5539	10.4548	11.0663	10.9009	11.0959
ENSMUSG00000059430	Actg2	3.19071	3.38757	3.5024	3.43876	3.98334	3.73237	3.04265	3.28709	3.36289
ENSMUSG00000074978	Actg-ps1	-0.930426	-0.924198	-0.794836	-0.738061	-0.895561	-0.748531	-0.921804	-0.791084	-0.779396
ENSMUSG00000078129	Actl10	2.74751	2.35131	2.60039	2.27805	2.22627	2.33874	2.22629	1.83283	2.09736
ENSMUSG00000066368	Actl11	4.06602	3.93769	4.20915	4.38556	4.15933	4.15167	3.46277	3.56056	3.17904
ENSMUSG00000027671	Actl6a	6.39393	6.30097	6.39772	6.2898	5.93455	6.21466	6.66307	6.69541	7.2786
ENSMUSG00000029712	Actl6b	3.33787	3.21809	3.04943	3.03304	3.05103	2.85338	2.98097	2.32445	2.3698
ENSMUSG00000070979	Actl7a	6.41318	6.99641	6.45135	5.04347	5.10641	5.27116	6.14523	6.48281	6.29722
ENSMUSG00000070980	Actl7b	5.73004	6.08417	5.84204	4.89488	4.46233	4.64221	5.78475	6.00461	5.59363
ENSMUSG00000067416	Actl9	2.42658	2.25339	2.29256	2.60022	2.43064	2.70945	2.20319	1.79921	1.69418
ENSMUSG00000092519	Actl9	2.42658	2.25339	2.29256	2.60022	2.43064	2.70945	2.20319	1.79921	1.69418
ENSMUSG00000015143	Actn1	12.69	12.7037	12.685	11.9284	11.964	11.8896	12.3881	13.0259	12.4162
ENSMUSG00000052374	Actn2	4.11409	4.35863	4.2961	3.9098	4.52483	4.14705	3.51491	3.73439	3.63041
ENSMUSG00000006457	Actn3	4.15109	4.36525	4.53874	4.28464	4.35209	4.1667	4.20896	3.86687	4.01265
ENSMUSG00000054808	Actn4	9.60502	9.47531	9.52843	10.3823	10.4773	10.3765	10.3355	10.8987	10.6834
ENSMUSG00000021076	Actr10	9.05491	9.17604	8.92775	8.93296	9.00287	8.73563	9.77107	9.76979	10.1578
ENSMUSG00000025228	Actr1a	10.0028	10.1531	9.86369	10.0207	10.0079	10.0169	10.8122	10.8175	11.0832
ENSMUSG00000037351	Actr1b	8.56722	8.76495	8.31263	8.52805	8.60844	8.45102	9.51368	9.37208	9.49305
ENSMUSG00000020152	Actr2	12.6063	12.91	12.7169	12.3208	12.2428	12.2858	12.8795	13.2567	13.3765
ENSMUSG00000026341	Actr3	12.7004	12.7923	12.6069	12.2547	12.2544	12.1539	12.5785	12.7238	12.9202
ENSMUSG00000056367	Actr3b	3.13888	3.10726	2.88587	3.25145	3.07921	3.33154	3.15558	3.18424	2.8882
ENSMUSG00000037761	Actr5	7.62959	7.58587	7.41347	7.1792	7.02857	7.05616	7.22466	7.44572	7.20722
ENSMUSG00000019948	Actr6	6.19817	5.77913	5.83823	5.27268	5.37537	5.60143	5.87895	5.51323	6.1633
ENSMUSG00000015971	Actr8	7.76843	7.83745	7.54317	6.79157	6.76341	6.56599	7.04844	6.9846	7.21408
ENSMUSG00000046615	Actrt1	0.540857	0.765408	0.26535	0.635022	0.302946	0.604242	0.390233	0.268081	0.41248
ENSMUSG00000051276	Actrt2	1.23098	1.12231	1.14504	1.45057	1.15653	0.854606	1.03877	0.804013	1.07496
ENSMUSG00000037737	Actrt3	3.4348	3.07442	3.56065	3.08668	3.28927	3.00786	3.24552	3.08271	2.73405
ENSMUSG00000026836	Acvr1	4.51328	4.2974	4.57868	4.5117	4.08434	4.59252	3.81217	4.20085	4.29873
ENSMUSG00000000532	Acvr1b	8.10956	6.66995	8.12697	8.66567	8.63821	8.66007	7.74536	7.98381	8.57948
ENSMUSG00000026834	Acvr1c	5.37993	5.47126	5.52128	5.32528	5.50146	5.39533	5.07323	5.09084	4.95539
ENSMUSG00000052155	Acvr2a	7.8934	8.08097	7.85034	7.36529	7.33876	7.33823	8.42965	8.59933	8.68332
ENSMUSG00000061393	Acvr2b	3.29856	2.92664	3.50508	2.71174	3.64233	3.27159	3.17375	3.07024	2.71842
ENSMUSG00000000530	Acvrl1	8.91683	5.37183	8.7655	7.20725	6.86454	7.32723	5.75545	5.84775	6.39459
ENSMUSG00000023262	Acy1	3.7441	3.73073	3.52763	3.92213	3.50796	3.50177	3.58023	4.08611	4.0085
ENSMUSG00000024866	Acy3	2.50401	2.89005	2.94002	2.98273	3.08801	2.99627	2.64528	2.74852	2.72692
ENSMUSG00000008822	Acyp1	6.03723	6.01229	6.15823	5.63886	5.39157	5.55041	5.25773	5.08219	5.7454
ENSMUSG00000060923	Acyp2	2.15388	1.98293	2.19908	2.24475	2.19367	2.30596	2.43014	2.12394	2.65199
ENSMUSG00000017697	Ada	5.63545	5.20934	5.29508	4.39012	4.27443	4.398	4.64014	4.61063	5.10744
ENSMUSG00000027719	Adad1	3.76476	4.14003	3.63667	3.78228	3.68586	3.43654	3.19961	3.43359	3.37599
ENSMUSG00000024266	Adad2	2.9546	3.08503	2.95884	3.09972	3.18964	2.71876	2.74265	2.60051	2.45794
ENSMUSG00000027259	Adal	5.61521	5.35924	5.86873	6.08655	6.03082	5.74513	5.48462	5.37045	5.9497
ENSMUSG00000054693	Adam10	10.5178	10.7234	10.5107	10.4754	10.6213	10.5523	11.2395	11.7254	11.628
ENSMUSG00000020926	Adam11	5.41545	4.86893	5.32362	5.01919	4.7033	4.74343	4.49716	3.7881	4.18546
ENSMUSG00000054555	Adam12	4.4142	4.69129	4.7706	4.55852	4.59778	4.6379	4.28736	4.05071	3.9188
ENSMUSG00000028041	Adam15	9.40278	9.02363	9.30782	10.3515	10.4908	10.2938	9.55031	9.55343	9.81582
ENSMUSG00000052593	Adam17	11.6065	12.6059	11.5954	12.9822	12.9907	12.9506	13.5844	13.6503	13.9107
ENSMUSG00000031552	Adam18	3.90921	4.11415	3.72644	3.90075	3.48447	4.04936	3.37514	3.47115	3.17759
ENSMUSG00000011256	Adam19	11.5356	11.722	11.552	9.76502	9.82173	9.92927	11.3176	11.7899	11.5453
ENSMUSG00000072647	Adam1a	6.50495	6.37096	6.06971	5.0137	5.49395	5.65158	6.59492	6.70544	6.64125
ENSMUSG00000062438	Adam1b	4.33676	4.07058	3.92661	4.01699	3.41396	4.04027	4.13434	3.75264	3.65826
ENSMUSG00000022039	Adam2	3.58344	3.9225	4.07343	4.01057	3.51857	4.57251	3.53087	3.36599	3.28997
ENSMUSG00000046282	Adam20	3.24614	3.2337	3.29071	3.44044	3.63763	3.2638	2.62679	2.54869	2.89327
ENSMUSG00000008438	Adam21	3.88123	3.85354	4.04348	3.58369	3.73674	3.73001	3.72832	3.71093	3.10044
ENSMUSG00000040537	Adam22	7.04513	7.63893	7.2648	7.76473	7.47605	7.96288	7.63307	8.26896	7.59042
ENSMUSG00000025964	Adam23	5.9938	5.82972	5.96957	6.25116	6.22469	5.87562	5.7254	5.34095	5.237
ENSMUSG00000046723	Adam24	2.93273	2.37109	3.00787	3.01848	3.26215	2.63343	2.81107	2.21584	2.3728
ENSMUSG00000071937	Adam25	2.41474	2.51834	2.56167	2.38348	2.55194	2.54753	2.3236	2.15499	2.56386
ENSMUSG00000048516	Adam26a	2.24137	2.34299	2.23148	2.42695	2.46578	2.36066	2.1431	1.61272	1.77325
ENSMUSG00000063900	Adam26b	2.59796	2.58975	2.24028	2.7238	2.20768	2.44534	2.4102	2.6553	2.20033
ENSMUSG00000014725	Adam28	4.45878	4.29396	4.16395	4.6732	5.01192	4.8135	4.01656	3.50781	3.86863
ENSMUSG00000046258	Adam29	2.98234	2.5949	2.5521	3.07431	2.99605	3.44469	2.79064	2.65766	2.31191
ENSMUSG00000031553	Adam3	4.98819	5.39552	4.87341	5.17657	4.77685	4.8629	4.92432	4.60593	4.92652
ENSMUSG00000043468	Adam30	4.15809	4.26813	4.18796	3.96473	3.93926	3.93213	4.18132	4.57463	4.08855
ENSMUSG00000037437	Adam32	3.94099	4.31084	4.31031	4.88087	4.62359	4.36142	4.22345	3.9329	3.71995
ENSMUSG00000027318	Adam33	4.75039	4.92713	4.62953	5.20151	4.91014	5.16669	4.31679	4.3573	3.71765
ENSMUSG00000079058	Adam34	2.29839	2.26311	2.1376	2.42013	2.24773	2.71961	1.71689	2.05995	1.62227
ENSMUSG00000054033	Adam39	2.81062	2.68166	2.79798	2.99722	3.00788	2.82331	2.39373	2.50583	2.36091
ENSMUSG00000072972	Adam4	3.87566	3.62471	3.97671	3.421	3.24282	3.41608	3.17325	3.27082	2.63737
ENSMUSG00000031554	Adam5	4.57519	4.59694	4.39765	4.84403	4.67249	4.79968	4.13449	4.30839	4.22179
ENSMUSG00000043945	Adam6a	1.72785	1.72964	1.91186	1.34457	1.60953	1.47167	1.8361	1.68697	1.51955
ENSMUSG00000051804	Adam6b	2.84882	2.43311	2.4765	2.6297	2.10561	2.45656	2.04381	1.95194	1.866
ENSMUSG00000022056	Adam7	3.88576	4.13948	4.08586	4.77103	4.46264	4.2962	3.93975	3.87344	3.43425
ENSMUSG00000025473	Adam8	13.8395	14.2301	13.7026	13.7193	13.7231	13.5888	14.4394	14.3546	14.2722
ENSMUSG00000031555	Adam9	7.69573	8.35362	7.74444	10.2717	10.1666	10.2785	10.7998	11.0817	11.2905
ENSMUSG00000022057	Adamdec1	3.45969	3.27451	3.38756	3.11028	3.39623	3.79558	2.92825	2.78601	2.75072
ENSMUSG00000022893	Adamts1	4.37859	4.50553	4.25668	4.39631	4.90367	4.59682	4.16463	4.01242	3.74857
ENSMUSG00000024299	Adamts10	8.86769	8.41285	8.67104	7.89356	7.90566	7.83371	7.81559	7.83088	7.90321
ENSMUSG00000047497	Adamts12	4.7483	4.15775	4.66133	4.47581	4.35965	4.87398	4.22392	3.97615	3.89556
ENSMUSG00000014852	Adamts13	4.04302	3.82783	4.1073	3.90577	3.65057	3.7997	3.93354	3.47959	3.91482
ENSMUSG00000059901	Adamts14	4.12015	4.20094	3.92201	4.09804	3.92701	3.62236	3.42723	3.64493	3.31555
ENSMUSG00000033453	Adamts15	3.72981	3.37487	3.65173	3.66274	3.6464	3.7805	3.08879	3.72893	3.10294
ENSMUSG00000049538	Adamts16	4.69531	5.12714	4.81252	4.84915	4.40096	5.22506	4.17674	4.3522	4.16154
ENSMUSG00000058145	Adamts17	4.70247	4.82673	4.25125	4.7713	4.2616	5.08294	4.06078	3.99575	3.97657
ENSMUSG00000053399	Adamts18	4.16119	4.23607	4.19157	4.55238	4.62658	4.37349	4.18484	3.29535	3.7464
ENSMUSG00000053441	Adamts19	3.56492	3.87242	4.03199	4.57075	4.45229	4.23691	3.61389	3.58504	3.73362
ENSMUSG00000036545	Adamts2	5.48251	5.73389	5.63982	5.58488	5.30626	5.49739	5.18307	4.94463	4.51083
ENSMUSG00000022449	Adamts20	4.58146	4.66255	5.04391	5.02229	5.193	4.9652	4.42314	3.99562	3.61974
ENSMUSG00000043635	Adamts3	4.9253	4.84111	5.19535	5.42838	5.42413	5.53586	5.25868	4.86728	4.76578
ENSMUSG00000006403	Adamts4	4.70879	5.41195	4.96655	5.04136	5.08271	5.15175	4.9588	5.1908	5.14566
ENSMUSG00000022894	Adamts5	5.72123	6.40107	5.85918	5.55675	5.3426	5.09152	5.60284	5.21456	5.62837
ENSMUSG00000046169	Adamts6	4.52933	4.46297	4.67973	5.01327	4.92687	5.03741	4.33591	4.68127	4.78889
ENSMUSG00000032363	Adamts7	7.09326	7.17862	6.99553	6.7214	6.43172	6.47806	6.65697	6.93839	6.95368
ENSMUSG00000031994	Adamts8	4.14104	4.0799	3.9422	3.90785	4.07745	4.34477	3.62968	3.60384	2.96247
ENSMUSG00000030022	Adamts9	5.75061	6.03204	5.48256	5.8047	6.26957	6.31434	5.26153	5.40805	4.77328
ENSMUSG00000066113	Adamtsl1	5.12054	5.26983	5.50285	5.74329	5.38422	5.59013	4.84451	4.82227	4.74883
ENSMUSG00000036040	Adamtsl2	4.65784	4.3085	4.58382	4.36314	4.30975	4.18081	3.89688	3.98523	3.96979
ENSMUSG00000070469	Adamtsl3	4.89389	5.38939	5.29643	5.08417	4.99556	4.6042	4.82869	4.52041	4.70612
ENSMUSG00000015850	Adamtsl4	8.33133	8.2119	8.49293	9.11842	9.21797	9.17279	9.58285	10.2726	9.6928
ENSMUSG00000043822	Adamtsl5	4.38262	4.54112	4.1741	4.23732	4.06284	4.29865	3.8946	3.58115	3.79506
ENSMUSG00000056413	Adap1	8.8139	8.73967	8.56868	8.95405	8.99153	9.01725	8.97024	9.11519	9.23299
ENSMUSG00000020709	Adap2	6.19943	6.45101	6.40274	7.52239	7.66951	7.55015	6.97232	6.97448	7.48234
ENSMUSG00000098355	adapt33_1	1.80657	1.66085	1.90513	2.25618	2.20038	2.07889	2.32826	2.19564	2.48205
ENSMUSG00000098396	adapt33_2	1.07497	1.23428	1.11965	1.9343	1.36128	1.76142	1.9165	1.49435	1.82824
ENSMUSG00000098711	adapt33_3	2.50613	2.54093	2.42121	2.60782	2.43168	2.6489	3.01849	2.523	2.66105
ENSMUSG00000098793	adapt33_4	1.8987	1.97404	2.09494	1.85258	2.0832	1.95343	2.32491	2.19454	2.54447
ENSMUSG00000027951	Adar	9.83509	9.67523	9.62745	10.0862	10.148	10.2013	10.8293	11.0533	11.0152
ENSMUSG00000020262	Adarb1	5.62713	5.47299	5.50328	5.61351	5.37298	5.36331	5.20534	4.87708	4.7305
ENSMUSG00000052551	Adarb2	5.00136	4.94998	5.11038	5.24769	5.25829	5.21414	4.73093	4.34531	4.40105
ENSMUSG00000031949	Adat1	5.24198	5.17534	5.40164	5.60845	5.49884	5.79915	5.17862	5.27598	5.49179
ENSMUSG00000019808	Adat2	4.91666	4.90653	4.90776	5.03124	4.71807	4.84952	4.3523	4.66302	4.5803
ENSMUSG00000035370	Adat3	4.94512	4.76878	4.6417	5.38034	5.44879	5.34001	5.30362	5.43861	5.73887
ENSMUSG00000028789	Adc	4.72207	4.57434	4.8317	5.81598	6.14308	6.07471	4.88795	4.44618	4.94919
ENSMUSG00000021044	Adck1	5.10753	4.62707	4.99082	4.65773	4.69337	4.29293	4.66647	4.56969	4.67498
ENSMUSG00000046947	Adck2	7.13895	6.61317	7.26052	6.83512	7.18324	6.64728	6.22682	6.58448	6.62279
ENSMUSG00000026489	Adck3	5.28202	5.25196	4.81152	5.52191	5.98051	6.03436	5.05208	5.09793	4.99614
ENSMUSG00000003762	Adck4	7.69114	7.63744	7.59972	7.79659	7.70604	7.67753	8.27742	8.25219	8.35972
ENSMUSG00000022550	Adck5	4.78833	5.2323	4.89517	6.63427	6.82854	6.48271	6.63882	6.90657	6.71154
ENSMUSG00000020431	Adcy1	5.27298	5.33223	5.35555	5.65195	5.70746	5.26855	5.05207	4.75038	4.57773
ENSMUSG00000026567	Adcy10	5.25126	5.31167	5.29158	5.50857	5.30231	5.06926	5.01085	4.6721	4.11403
ENSMUSG00000021536	Adcy2	5.88523	6.46632	5.57896	4.78659	5.34518	4.51499	7.05055	7.16514	6.98265
ENSMUSG00000020654	Adcy3	6.77279	6.88669	6.77949	5.6645	5.92994	6.09947	7.01587	7.31535	6.88992
ENSMUSG00000022220	Adcy4	7.52863	7.31589	7.7518	7.45444	7.49926	7.62712	8.41878	9.09225	8.46259
ENSMUSG00000022840	Adcy5	4.43936	4.65733	4.62001	4.01284	3.98518	4.86816	4.22432	3.49297	4.02655
ENSMUSG00000022994	Adcy6	5.92986	5.62025	5.59764	5.6331	5.58635	5.90429	5.30385	5.351	5.74004
ENSMUSG00000031659	Adcy7	10.0057	9.65778	9.91994	9.72629	9.80097	9.85752	9.64915	9.7614	10.0813
ENSMUSG00000022376	Adcy8	4.2996	4.38706	4.2368	4.60238	4.67489	4.3114	4.38474	3.70788	3.85885
ENSMUSG00000005580	Adcy9	7.35904	6.91172	7.23516	5.29826	5.81805	5.59854	4.86907	4.95116	4.92272
ENSMUSG00000024256	Adcyap1	2.58891	1.92811	2.4638	2.63993	1.86918	2.56357	1.84759	1.86197	1.89869
ENSMUSG00000029778	Adcyap1r1	4.93286	4.98207	4.74215	4.83712	4.56036	4.88187	4.53663	3.94399	4.09629
ENSMUSG00000029106	Add1	11.6576	11.7008	11.5806	11.8046	11.7916	11.7439	11.5799	11.7456	11.7452
ENSMUSG00000030000	Add2	3.7054	3.74245	3.61294	3.75701	4.10395	3.72657	3.65879	2.85981	2.81963
ENSMUSG00000025026	Add3	12.0071	11.9355	11.9408	9.90966	9.991	9.84281	10.4741	10.5172	10.6037
ENSMUSG00000050994	Adgb	6.50984	7.0419	6.4816	7.6509	7.70291	7.88825	9.06118	9.58938	9.60398
ENSMUSG00000074207	Adh1	3.13016	3.02097	3.48831	3.70931	3.80076	3.12205	2.99643	2.68275	2.83794
ENSMUSG00000037797	Adh4	2.90546	2.62862	2.80807	2.62542	2.67056	2.56015	2.43415	2.36381	2.59514
ENSMUSG00000028138	Adh5	7.31408	7.21193	7.17933	6.53629	6.80981	6.79856	7.72976	7.78925	8.13053
ENSMUSG00000053054	Adh6a	3.64894	3.67436	3.78726	4.29741	3.83006	3.88902	3.19325	3.29583	2.84253
ENSMUSG00000074206	Adh6b	3.19524	2.75874	2.96272	3.79868	3.42639	3.34263	3.02998	2.90775	2.70133
ENSMUSG00000090306	Adh6-ps1	2.67199	3.18	2.91105	3.38148	3.02892	3.75403	3.11133	2.68531	2.54212
ENSMUSG00000055301	Adh7	3.78094	4.10037	4.01392	3.81314	3.93288	3.92574	3.77889	3.65176	3.40251
ENSMUSG00000025911	Adhfe1	4.44772	3.97663	4.20358	3.84816	3.89862	3.89154	3.64804	3.42719	3.70682
ENSMUSG00000020629	Adi1	4.45127	4.1286	4.1069	4.81604	4.36843	4.63399	4.28361	5.08295	5.12118
ENSMUSG00000044405	Adig	1.63437	1.86908	2.18866	1.64973	1.47131	1.75245	1.97837	1.91527	2.04417
ENSMUSG00000022878	Adipoq	2.16738	2.1945	2.15594	2.23071	2.1761	1.63981	1.88533	2.25075	1.93923
ENSMUSG00000026457	Adipor1	13.6276	14.1493	13.4587	14.0308	13.9965	13.8805	14.828	14.7505	14.8396
ENSMUSG00000030168	Adipor2	11.9725	12.2644	11.8388	11.9424	11.9541	11.7487	12.6144	12.6301	12.6287
ENSMUSG00000039197	Adk	5.65224	5.44941	5.6919	5.50596	5.62575	5.42553	5.50995	5.35674	5.67918
ENSMUSG00000030790	Adm	1.9638	2.59125	2.42628	2.84591	2.3781	2.25626	2.49716	1.8566	2.32837
ENSMUSG00000054136	Adm2	1.23062	1.46639	1.09095	1.36308	1.02782	1.68062	1.0895	1.32151	1.45732
ENSMUSG00000051149	Adnp	10.0651	10.1102	10.3707	9.47335	9.36858	9.5079	10.1149	10.9203	10.3577
ENSMUSG00000053950	Adnp2	9.22327	9.40916	9.13879	9.54092	9.49686	9.39771	9.77199	9.94797	9.91855
ENSMUSG00000057134	Ado	6.65428	6.12517	6.11942	6.59201	6.59376	6.64787	6.40691	6.44656	6.9221
ENSMUSG00000042429	Adora1	5.42452	5.40128	5.66521	6.06567	5.94025	6.14348	6.43068	6.61108	7.0846
ENSMUSG00000020178	Adora2a	3.96514	4.05624	3.83058	6.55251	6.70013	6.59545	4.59292	4.51319	5.55445
ENSMUSG00000018500	Adora2b	4.00968	4.232	3.80578	4.45625	5.03998	4.95621	4.29996	4.34013	5.17274
ENSMUSG00000074344	Adora3	6.69105	6.777	6.95418	5.78963	6.03263	5.72495	5.69247	6.16569	5.71976
ENSMUSG00000000562	Adora3	6.15404	5.8422	6.14742	6.48931	6.81082	6.69504	6.75102	7.15797	7.27871
ENSMUSG00000025236	Adpgk	13.7149	13.2583	13.6133	8.13436	8.13667	8.20343	10.8994	10.8697	10.9414
ENSMUSG00000002844	Adprh	8.96975	8.80633	8.57687	9.68733	9.73541	9.74795	9.87757	9.83622	10.2242
ENSMUSG00000031448	Adprhl1	3.41744	3.56618	3.62791	3.46406	3.46406	3.45792	3.46348	3.79711	3.08222
ENSMUSG00000042558	Adprhl2	6.25368	5.99876	6.09368	5.80721	6.20846	5.74196	6.80353	6.60874	6.76142
ENSMUSG00000020910	Adprm	8.14229	8.24163	7.98275	8.67821	8.37373	8.5279	8.71435	8.93032	9.16968
ENSMUSG00000045875	Adra1a	5.43563	5.01016	4.95249	5.7237	5.84387	5.73456	4.94462	5.10613	4.53917
ENSMUSG00000050541	Adra1b	2.82418	3.26777	3.26675	3.70923	3.67795	3.60489	2.99366	2.57701	2.8344
ENSMUSG00000027335	Adra1d	2.07043	2.16081	1.85995	1.94308	2.02701	1.89941	2.03835	2.1388	2.10229
ENSMUSG00000033717	Adra2a	3.82835	3.58785	3.53611	3.7783	3.60264	3.67637	3.74838	4.0937	3.92083
ENSMUSG00000058620	Adra2b	3.68374	4.03316	3.57897	3.32995	3.75289	3.7461	3.51781	3.42984	3.29844
ENSMUSG00000045318	Adra2c	2.28071	1.6787	1.70589	2.15902	1.87226	1.98748	1.70334	1.49095	1.51754
ENSMUSG00000035283	Adrb1	2.49452	2.52323	2.86335	3.25644	2.92028	3.08569	2.64305	2.07178	2.45473
ENSMUSG00000045730	Adrb2	10.5133	10.9273	10.4998	9.45652	9.52991	9.4874	10.2515	10.5406	10.1172
ENSMUSG00000031489	Adrb3	4.20698	3.83476	3.90224	4.42497	4.08477	4.19438	3.57605	3.1804	3.41683
ENSMUSG00000024858	Adrbk1	13.2483	13.5229	13.1244	12.6031	12.6738	12.5837	13.616	13.7006	13.476
ENSMUSG00000042249	Adrbk2	7.46367	7.18539	7.41968	8.01822	8.43778	8.22273	6.92835	6.8386	7.12786
ENSMUSG00000039041	Adrm1	7.89114	8.01756	7.71551	7.77343	8.01794	7.67322	8.29932	8.18967	8.40823
ENSMUSG00000022407	Adsl	5.79891	5.56111	5.67301	6.04979	5.92526	5.83563	6.28593	6.13617	6.82453
ENSMUSG00000015961	Adss	9.12643	8.92955	9.06361	9.05921	9.03237	9.04382	8.64553	8.60291	9.19791
ENSMUSG00000011148	Adssl1	10.2469	10.4985	9.9761	10.2519	10.2403	10.09	11.0407	11.0806	11.1503
ENSMUSG00000058022	Adtrp	5.72823	5.74849	5.63372	5.71536	5.30417	5.59183	5.28784	5.00711	5.02504
ENSMUSG00000020473	Aebp1	3.71916	3.91928	3.42243	3.38213	3.63444	3.76857	3.53072	3.18164	3.00283
ENSMUSG00000030232	Aebp2	8.53201	8.38778	8.61882	7.77602	7.58862	7.75408	8.60083	8.98199	8.90245
ENSMUSG00000030609	Aen	5.16171	5.33538	5.25661	5.32679	5.45134	5.54034	6.00497	6.30273	6.12163
ENSMUSG00000054452	Aes	10.5499	10.5595	10.2503	10.9647	10.9994	10.8696	10.698	10.5729	10.7578
ENSMUSG00000095071	AF067061	0.902189	0.495929	0.511854	0.323682	0.611207	0.312774	0.27664	0.405366	0.421025
ENSMUSG00000094237	AF067063	-1.21317	-1.30041	-1.29754	-1.26447	-1.27167	-1.27217	-1.09255	-1.29562	-1.18109
ENSMUSG00000044811	AF251705	10.0943	11.076	9.88424	9.49698	9.56721	9.35151	10.9966	10.8336	10.8228
ENSMUSG00000065022	AF357341	-1.55586	-1.54757	-1.54328	-1.40336	-1.51773	-1.51823	-1.32915	-1.54138	-1.53556
ENSMUSG00000064621	AF357355	0.0782738	0.103043	0.113534	0.349641	0.178594	0.177318	-0.0126669	0.234088	0.13281
ENSMUSG00000077711	AF357399	2.12298	1.84744	2.25187	1.76731	2.38544	2.27352	2.1643	2.73988	2.32129
ENSMUSG00000088294	AF357425	-0.935262	-1.07747	-1.17822	-1.14533	-1.15288	-1.1534	-1.07116	-1.17752	-1.17179
ENSMUSG00000065749	AF357428	-1.23925	-1.23463	-1.11022	-1.06823	-1.20294	-1.20352	-1.11094	-1.2308	-1.0976
ENSMUSG00000057116	AF366264	4.42539	4.82696	4.49495	5.39357	5.51895	5.30951	3.93757	3.79347	3.51016
ENSMUSG00000039313	AF529169	3.42774	2.99786	3.35498	3.67541	3.10013	3.18716	3.04443	2.84243	2.7198
ENSMUSG00000029094	Afap1	7.47854	7.24572	7.63081	6.79329	6.25266	6.80051	7.31783	7.64404	7.45542
ENSMUSG00000033032	Afap1l1	4.69013	4.80579	4.76511	4.98278	4.89942	4.84549	5.11832	5.08829	4.84325
ENSMUSG00000025083	Afap1l2	4.52059	4.21439	4.67673	4.60769	4.77612	4.63149	4.43643	3.82149	4.08632
ENSMUSG00000029313	Aff1	11.1012	10.9803	11.1304	11.0689	11.0724	11.0347	11.2057	11.7251	11.3862
ENSMUSG00000031189	Aff2	6.38084	6.62516	6.3887	5.78638	5.87139	5.4255	6.01011	5.84486	5.68913
ENSMUSG00000037138	Aff3	6.00877	5.01417	5.90132	5.03701	5.17085	5.54502	5.3655	5.24461	5.16782
ENSMUSG00000049470	Aff4	11.2732	11.5669	11.2744	11.2516	11.1942	11.1389	11.9845	12.2714	12.2912
ENSMUSG00000031967	Afg3l1	7.60777	7.24771	7.5519	6.70525	6.90307	6.81833	7.23872	7.21361	7.4777
ENSMUSG00000024527	Afg3l2	6.33888	5.62155	6.39965	6.2704	5.86989	6.06074	6.01714	5.93758	6.60704
ENSMUSG00000029369	Afm	3.77505	3.89909	4.27582	4.28445	3.92776	3.98613	3.35681	3.23816	3.5373
ENSMUSG00000017718	Afmid	5.94021	5.49363	5.91257	5.96202	6.03843	5.77595	5.9973	6.01671	5.59248
ENSMUSG00000054932	Afp	3.54544	3.10721	3.34207	3.32209	3.32584	3.31992	3.15535	2.71072	3.25675
ENSMUSG00000049659	Aftph	10.6771	11.0403	10.6702	10.478	10.3847	10.3329	11.6295	11.8554	12.0204
ENSMUSG00000031521	Aga	7.64548	8.21525	7.31649	5.63061	5.51829	5.67744	5.28028	5.32964	6.019
ENSMUSG00000055013	Agap1	11.2144	11.2892	11.2185	9.7976	9.96516	9.82408	10.5828	11.0093	10.5204
ENSMUSG00000025422	Agap2	8.99591	8.28468	8.7952	7.45344	7.61901	7.62565	8.55554	8.74944	8.51597
ENSMUSG00000023353	Agap3	7.87324	7.62988	7.77564	6.64737	6.52572	6.30885	7.88879	7.73728	7.63715
ENSMUSG00000025754	Agbl1	3.88459	3.86291	3.59262	3.79566	4.08747	4.18773	3.12612	3.15468	2.95606
ENSMUSG00000040812	Agbl2	5.07328	5.3812	5.07079	5.37258	5.00587	5.19088	4.52585	4.78498	4.20254
ENSMUSG00000038836	Agbl3	5.72873	5.52862	5.91458	6.13829	5.89283	5.80618	5.50941	5.30181	4.92591
ENSMUSG00000061298	Agbl4	5.22304	5.07984	5.21752	5.71407	6.04233	5.90042	4.99168	4.84573	4.92393
ENSMUSG00000029165	Agbl5	8.17452	8.14999	8.04356	8.33795	8.39814	8.43704	8.27253	8.4068	8.54461
ENSMUSG00000015452	Ager	8.2529	8.48173	8.24612	8.10697	8.25022	8.01754	8.80945	8.90983	8.64891
ENSMUSG00000026159	Agfg1	10.6324	10.79	10.4654	10.5287	10.4482	10.4491	10.9209	11.0471	11.2809
ENSMUSG00000029722	Agfg2	7.42267	6.55922	7.19502	7.59241	7.88877	7.57004	6.54796	6.63545	7.11175
ENSMUSG00000021681	Aggf1	9.06999	9.08602	8.94533	8.76952	8.77625	8.69725	8.99923	9.07029	9.28722
ENSMUSG00000029916	Agk	4.62862	4.7733	4.89258	6.65304	6.41691	6.54657	4.78168	5.17313	5.081
ENSMUSG00000033400	Agl	11.1369	11.2985	11.1472	9.92953	9.86514	9.99684	10.3388	10.5852	10.3255
ENSMUSG00000040706	Agmat	2.40108	2.57069	2.55622	2.35338	2.05331	2.05023	2.09354	1.79008	2.25116
ENSMUSG00000050103	Agmo	4.00303	4.29912	4.29623	4.91246	4.82724	4.77711	3.86509	4.28796	3.67292
ENSMUSG00000041530	Ago1	8.24241	8.11157	8.33274	8.19408	8.29065	8.31216	8.26385	8.79689	8.71647
ENSMUSG00000036698	Ago2	11.4964	11.3515	11.7168	10.5897	10.5285	10.6226	11.4536	12.2996	11.3594
ENSMUSG00000028842	Ago3	7.7565	7.55099	7.88134	8.5427	8.34994	8.43631	8.48931	9.03846	8.6469
ENSMUSG00000042500	Ago4	9.13158	9.19368	9.23997	6.88104	6.49209	6.67087	7.58408	7.91287	7.513
ENSMUSG00000034254	Agpat1	8.63906	8.27265	8.41843	7.98339	7.9285	8.00175	8.38636	8.35868	8.40336
ENSMUSG00000026922	Agpat2	9.7032	9.60942	9.50356	8.0051	8.17585	8.00078	9.45601	9.33944	9.31358
ENSMUSG00000001211	Agpat3	5.01802	4.77681	4.92996	6.26982	6.6912	6.63857	5.18901	5.15283	5.73544
ENSMUSG00000023827	Agpat4	7.24624	6.92459	7.19816	8.07857	8.18901	8.12003	6.82698	6.51599	7.25622
ENSMUSG00000031467	Agpat5	8.87408	9.0449	8.93761	9.00687	8.80561	9.15241	9.66486	9.82606	9.8092
ENSMUSG00000031545	Agpat6	7.68427	7.46807	7.648	7.1312	7.15276	7.33739	8.06042	8.07564	8.5163
ENSMUSG00000029314	Agpat9	10.0466	10.629	9.94486	10.2852	10.2552	10.118	11.6181	11.7003	11.9413
ENSMUSG00000042410	Agps	11.1833	11.2283	11.2168	11.0618	11.0179	11.0466	11.5457	11.5986	11.8648
ENSMUSG00000020581	Agr2	3.74364	3.69782	3.56065	3.83266	3.99058	3.65481	3.37926	3.0462	3.11456
ENSMUSG00000036231	Agr3	2.07618	1.87461	1.71509	2.38564	2.11841	2.00325	1.35324	1.49514	1.52283
ENSMUSG00000041936	Agrn	9.35158	9.56434	9.30919	9.89426	9.9497	9.87144	9.92268	10.149	9.71781
ENSMUSG00000005705	Agrp	2.3384	3.04933	2.30039	2.45632	2.51773	2.90107	2.29705	2.85399	2.26148
ENSMUSG00000031980	Agt	2.13151	2.01883	2.20641	2.34165	1.8244	1.52654	1.78167	1.79648	1.72229
ENSMUSG00000021557	Agtpbp1	10.4183	10.6193	10.4608	11.0664	11.0604	11.0271	11.128	11.4258	11.3793
ENSMUSG00000049115	Agtr1a	2.57271	2.4663	2.42231	2.61202	2.85118	3.09044	2.65755	2.24751	2.49275
ENSMUSG00000054988	Agtr1b	3.17977	2.96792	3.27136	3.41916	3.33103	3.61008	2.86678	2.62974	2.58197
ENSMUSG00000068122	Agtr2	2.64498	2.82487	2.49718	3.09841	2.7388	2.92629	2.99276	2.32287	2.47338
ENSMUSG00000029007	Agtrap	10.2209	9.92218	10.1645	10.0568	10.2516	10.1506	10.5796	10.6843	10.9987
ENSMUSG00000026272	Agxt	1.49906	1.87698	1.76606	1.69549	1.22606	1.6488	1.59181	1.4032	1.17558
ENSMUSG00000089678	Agxt2	3.75313	3.58325	3.94806	4.208	4.84783	3.89796	3.17338	3.03108	3.3598
ENSMUSG00000026491	Ahctf1	9.8138	9.72557	9.81534	9.60364	9.63674	9.61106	9.61385	9.67311	10.0705
ENSMUSG00000027597	Ahcy	3.65658	3.56342	3.92881	3.5491	3.79405	4.05431	3.61957	4.16639	4.09567
ENSMUSG00000027893	Ahcyl1	8.59204	8.47288	8.62289	8.38316	8.47706	8.51436	8.74151	9.33089	8.98477
ENSMUSG00000029772	Ahcyl2	8.31258	8.2496	8.17654	7.92317	8.08888	7.92362	9.11859	9.23778	9.22091
ENSMUSG00000037692	Ahdc1	6.22598	6.15629	6.29746	7.98864	8.07675	7.91305	6.88542	7.71221	7.25474
ENSMUSG00000019986	Ahi1	6.88342	6.90077	6.79608	7.51915	7.51222	7.31952	7.94698	8.46912	8.46142
ENSMUSG00000069833	Ahnak	8.87955	8.47617	8.77728	11.3853	11.3908	11.4087	10.69	10.6143	11.3353
ENSMUSG00000072812	Ahnak2	4.68927	4.50593	4.47555	4.7914	4.93433	5.03964	4.31077	4.34988	4.53425
ENSMUSG00000019256	Ahr	5.64693	5.5087	5.5163	5.62404	5.54715	5.63103	6.02973	5.92718	6.1469
ENSMUSG00000021575	Ahrr	5.55969	5.61921	5.39767	5.35057	5.55637	5.51587	5.38948	5.0547	5.07741
ENSMUSG00000021037	Ahsa1	9.46988	9.55471	9.1518	8.77778	8.74917	8.71573	9.70978	9.64632	9.93164
ENSMUSG00000020288	Ahsa2	9.53346	9.69368	9.45114	8.7992	8.82097	8.67958	10.2358	10.5001	10.5335
ENSMUSG00000022868	Ahsg	2.26444	2.07181	2.19069	2.48619	2.32073	1.96464	1.91628	2.1222	1.73697
ENSMUSG00000097745	AI115009	1.88581	1.66737	1.69633	1.80292	1.75805	1.87159	1.37978	1.61155	1.41367
ENSMUSG00000032313	AI118078	4.25559	4.27145	4.1492	4.38139	4.14661	4.61483	3.85941	3.99758	3.68203
ENSMUSG00000035875	AI182371	4.87396	4.28087	5.00032	4.11388	4.46369	4.61238	4.26621	4.50393	4.36186
ENSMUSG00000050812	AI314180	11.6004	11.764	11.6815	11.1092	11.0294	10.9646	11.7772	12.1759	12.0504
ENSMUSG00000074987	AI314831	4.56531	4.70705	4.41914	4.59316	4.05371	4.51653	4.04438	3.69689	3.64706
ENSMUSG00000038522	AI317395	2.8339	2.66886	2.49075	2.90842	2.53246	2.9153	2.2129	2.2306	2.37957
ENSMUSG00000062753	AI413582	6.5369	6.41577	6.11151	7.3862	7.19832	7.35843	7.55526	7.63668	7.86315
ENSMUSG00000073854	AI427809	2.45954	2.69667	2.80513	3.0304	2.60206	2.25277	2.36992	2.10333	2.34711
ENSMUSG00000086712	AI427809	1.79972	1.49132	1.51603	1.57817	1.66869	1.66569	1.41078	1.62362	1.33028
ENSMUSG00000074384	AI429214	3.89969	4.11309	3.96062	4.59531	4.31871	4.56392	4.17813	3.71751	3.86578
ENSMUSG00000071654	AI462493	6.41467	6.16261	6.29371	5.41936	5.53347	4.90633	5.82954	5.82682	5.97006
ENSMUSG00000046312	AI464131	3.56159	3.43174	3.59787	3.96307	3.42765	3.8521	3.37148	2.88529	2.63699
ENSMUSG00000045165	AI467606	11.1035	11.2543	10.924	10.3239	10.295	10.2024	11.1186	10.9812	11.0746
ENSMUSG00000090086	AI480526	8.07906	7.56591	8.21572	8.03874	8.1955	8.00448	7.26139	7.52321	7.39432
ENSMUSG00000038598	AI481877	4.57514	4.74303	4.88095	5.04432	4.78314	4.86346	4.84513	4.52623	3.8716
ENSMUSG00000056145	AI504432	6.05022	5.83164	5.90941	7.52981	7.42221	7.52914	6.79851	7.1564	8.10721
ENSMUSG00000073731	AI507597	2.71912	2.83625	2.74982	2.58923	2.75259	2.2681	3.05819	2.90688	2.83277
ENSMUSG00000078307	AI593442	4.31916	4.53809	4.2149	4.91249	4.69957	4.64549	3.92237	3.78776	3.93883
ENSMUSG00000060935	AI597468	7.5633	7.53409	7.53642	8.62936	8.52966	8.72126	8.19767	8.60142	8.90758
ENSMUSG00000010290	AI597479	7.29041	7.11448	7.05032	6.72025	7.04386	6.56718	7.08794	7.08651	7.48461
ENSMUSG00000074873	AI606181	7.69665	7.75331	7.81341	7.72994	7.60772	7.72393	7.78449	8.17427	7.81221
ENSMUSG00000093738	AI606473	2.83281	2.76007	3.01057	3.26407	3.00917	3.25031	2.64705	2.2806	2.54298
ENSMUSG00000073490	AI607873	5.40253	4.9937	5.42553	6.23262	6.30602	6.02479	6.03882	6.10349	6.04383
ENSMUSG00000087521	AI646519	0.862494	0.615994	0.744639	1.14842	0.546913	0.8506	0.627641	0.634575	0.652367
ENSMUSG00000034382	AI661453	3.91046	3.96217	4.03067	3.98462	3.73513	4.12981	3.57681	3.72468	3.69306
ENSMUSG00000087107	AI662270	7.4179	6.76804	7.20495	7.70895	7.63101	7.62804	7.76548	7.72407	8.71451
ENSMUSG00000074195	AI747448	3.1687	3.20332	3.60612	3.6354	3.23649	2.72532	3.00248	2.51539	2.56811
ENSMUSG00000029875	AI836003	2.34048	2.51153	2.46891	3.06175	3.13747	3.0582	2.54874	2.48598	2.44483
ENSMUSG00000047423	AI837181	8.27676	8.75117	8.11475	8.44466	8.52789	8.64048	9.17699	9.10556	9.23179
ENSMUSG00000085180	AI838599	4.38496	4.47786	4.48408	5.08277	5.13707	5.407	4.31895	4.0785	3.50731
ENSMUSG00000024970	AI846148	5.04157	5.1596	4.76953	5.83421	5.54163	5.62184	5.54935	5.79876	5.739
ENSMUSG00000084826	AI847159	3.45238	3.19567	3.47576	3.35128	3.07903	2.85588	3.24525	3.60167	3.28376
ENSMUSG00000096883	AI848285	2.88745	3.11735	3.1239	2.25448	2.34844	2.20711	2.26807	2.98346	2.78326
ENSMUSG00000097280	AI849053	3.2741	3.94787	3.48045	3.54512	4.03463	4.38466	3.69694	3.50722	2.85601
ENSMUSG00000097023	AI854517	3.46984	3.92521	3.52443	3.69954	3.34797	4.00216	3.57442	3.55106	3.29907
ENSMUSG00000053297	AI854703	4.43528	4.56795	4.24126	4.33168	4.27922	4.01722	4.19423	3.90559	3.62296
ENSMUSG00000056383	AI987944	6.71262	6.43579	6.81789	6.11014	6.26461	6.07341	6.25742	6.41228	6.88352
ENSMUSG00000040627	Aicda	9.87736	10.2735	9.99752	8.06178	8.03205	8.06178	8.24207	8.55569	8.04098
ENSMUSG00000042901	Aida	6.64907	6.64727	6.71674	5.77773	6.4167	5.80958	7.00447	7.23338	7.34132
ENSMUSG00000024397	Aif1	5.01583	5.15812	5.33637	7.31537	7.48599	7.57844	7.14175	7.22465	8.58683
ENSMUSG00000001864	Aif1l	3.99801	4.2064	4.16907	4.14254	3.75416	3.82329	3.95548	3.79581	3.27466
ENSMUSG00000036932	Aifm1	6.75526	6.23736	6.38814	7.08082	7.33344	7.40126	7.11274	7.19617	7.55643
ENSMUSG00000020085	Aifm2	6.70963	6.13862	6.62703	7.90645	7.75389	7.67321	6.65023	6.72446	6.97077
ENSMUSG00000022763	Aifm3	4.6421	4.68276	4.70512	4.33427	4.55775	4.01007	4.07556	4.11342	3.88157
ENSMUSG00000019806	Aig1	5.62523	5.50582	5.81449	6.24647	5.9379	5.7491	5.32578	5.444	4.95908
ENSMUSG00000019866	Aim1	8.82712	8.84604	8.82227	6.97574	6.77945	7.19884	7.10566	7.31224	7.10699
ENSMUSG00000012123	Aim1l	9.10997	9.63328	9.02549	9.09378	9.15249	9.01929	9.19052	9.27105	9.06686
ENSMUSG00000037860	Aim2	9.60583	10.3375	9.59166	9.36403	9.20945	9.31058	11.2678	11.4594	11.3845
ENSMUSG00000028029	Aimp1	6.41825	6.25763	6.3658	6.27652	6.19008	6.11229	5.89574	6.13874	6.77394
ENSMUSG00000029610	Aimp2	5.53855	5.84035	5.24057	5.41956	5.71036	5.41735	5.65199	5.86095	6.1887
ENSMUSG00000024847	Aip	9.08741	9.10332	8.96914	9.23933	9.40125	9.1598	9.13146	9.27353	9.26162
ENSMUSG00000097319	AIP	0	0	0	0	0	0	0	0	0
ENSMUSG00000040554	Aipl1	4.51169	4.44817	4.45897	4.26763	4.02456	4.15007	4.06505	3.90575	3.75985
ENSMUSG00000000731	Aire	4.02952	3.92673	3.90143	3.96834	3.86728	4.29647	4.1166	3.66016	4.07111
ENSMUSG00000078247	Airn	3.95418	4.48429	4.62938	4.91115	4.37058	4.63531	4.65454	5.00941	4.38257
ENSMUSG00000039546	Ajap1	1.94687	2.02479	2.25355	2.93952	2.37363	3.00562	2.24999	1.95948	2.32286
ENSMUSG00000022178	Ajuba	3.59719	3.47069	3.58369	3.27502	3.62781	3.62128	3.81294	3.38176	3.08828
ENSMUSG00000091931	AK010878	7.27058	7.39194	7.39902	7.86228	7.81419	7.68222	8.18564	8.04257	8.42061
ENSMUSG00000026817	Ak1	3.67013	3.61546	3.47044	3.46573	3.46568	3.93509	3.40729	3.2465	3.08993
ENSMUSG00000040729	AK129341	4.09194	3.87487	4.11875	4.239	4.24613	4.49174	3.67633	3.58863	3.38182
ENSMUSG00000078139	AK157302	1.28943	1.54059	1.36281	1.53248	1.9593	1.74368	1.24342	1.76131	1.13795
ENSMUSG00000090187	AK157302	-0.980168	-1.07735	-1.07519	-1.03923	-0.914733	-1.04868	-1.07539	-0.736701	-1.07023
ENSMUSG00000028792	Ak2	9.3337	9.10982	9.23972	9.94398	9.92847	9.88336	9.40786	9.72582	10.2502
ENSMUSG00000024782	Ak3	8.36736	8.52197	8.36832	8.02809	7.79516	7.839	8.41689	8.8556	8.64215
ENSMUSG00000081957	Ak3l2-ps	-1.2902	-1.07392	-1.28338	-1.24752	-1.25533	-1.1381	-1.16825	-1.2813	-1.2749
ENSMUSG00000028527	Ak4	4.43827	4.53089	4.2864	5.09708	5.0859	4.72965	5.00087	4.84534	5.46701
ENSMUSG00000039058	Ak5	4.46592	4.5998	4.312	3.84673	3.83338	4.05257	4.67028	4.49085	4.08271
ENSMUSG00000041323	Ak7	4.40319	4.47131	4.41387	4.15783	4.36152	4.29697	4.21745	3.98158	3.84786
ENSMUSG00000026807	Ak8	3.98263	3.6078	3.61943	3.763	3.42344	3.7326	3.56033	2.87527	3.5585
ENSMUSG00000091415	Ak9	4.97504	5.1618	5.26984	4.93683	5.35359	5.57789	4.65535	3.90265	4.23623
ENSMUSG00000018428	Akap1	4.69926	4.50708	4.87133	4.49331	4.80417	4.65037	4.80553	4.7555	5.10202
ENSMUSG00000047804	Akap10	9.57298	9.72328	9.62556	9.27	9.36749	9.32476	9.97205	10.277	10.1855
ENSMUSG00000022016	Akap11	8.60696	8.20789	8.68603	7.43395	7.3783	7.33444	7.37425	7.49389	7.95904
ENSMUSG00000038587	Akap12	5.52035	5.591	5.81608	5.39725	5.62309	5.39309	5.43923	4.96892	5.01792
ENSMUSG00000066406	Akap13	13.8491	13.8026	13.8843	11.9582	11.9673	12.0559	13.0242	13.4616	13.0351
ENSMUSG00000036551	Akap14	3.45222	3.60294	3.45748	3.77721	3.45146	3.60196	3.33349	3.2993	3.15271
ENSMUSG00000059708	Akap17b	4.67092	4.84416	4.51609	5.36068	5.1876	5.28506	5.08465	5.0495	5.32148
ENSMUSG00000038729	Akap2	5.7438	5.89701	5.63465	6.20103	6.24479	6.21378	6.1838	5.79267	6.23583
ENSMUSG00000030344	Akap3	3.32756	3.2704	3.43621	3.30562	3.46844	3.53468	3.13931	2.59053	2.74763
ENSMUSG00000050089	Akap4	2.15986	2.16976	2.44153	2.25193	2.52415	2.19699	2.63383	1.92462	2.07265
ENSMUSG00000021057	Akap5	4.72598	4.92705	4.81534	4.93438	5.33404	4.88702	4.77744	4.38463	3.95805
ENSMUSG00000061603	Akap6	5.26268	5.49697	4.95305	5.63005	5.48838	5.65304	4.88353	4.82943	5.0737
ENSMUSG00000039166	Akap7	7.86504	7.94735	7.77463	7.52891	7.29995	7.14163	6.22344	6.52117	6.61718
ENSMUSG00000024045	Akap8	9.39587	9.41379	9.42406	7.8437	8.09133	7.8354	9.25826	9.32161	9.4363
ENSMUSG00000002625	Akap8l	9.17044	9.21033	9.04172	8.33498	8.55609	8.37601	9.05465	9.17477	9.05017
ENSMUSG00000040407	Akap9	10.2588	10.2157	10.3632	9.40689	9.3799	9.4901	10.076	10.4389	10.3801
ENSMUSG00000031023	Akip1	3.44012	3.02802	3.28063	3.38551	3.21002	3.46227	3.44872	3.10156	3.71827
ENSMUSG00000023075	Akirin1	9.66753	9.87026	9.4205	9.63986	9.72914	9.56565	10.3783	10.4964	10.6445
ENSMUSG00000028291	Akirin2	7.70972	7.65006	7.63208	7.76797	7.5822	7.67518	7.66037	7.82256	8.0338
ENSMUSG00000039158	Akna	13.0724	13.133	13.1203	12.0025	12.0564	12.0377	12.5358	13.0194	12.3793
ENSMUSG00000049565	Aknad1	4.86956	4.58925	4.79427	4.95646	4.73621	5.17045	4.78677	4.22817	4.00007
ENSMUSG00000036500	Akp3	2.2198	2.25524	2.06393	2.09894	1.78592	2.16238	2.22	1.78664	1.93047
ENSMUSG00000028692	Akr1a1	9.1327	9.13528	9.11222	9.64459	9.64646	9.60276	10.0061	9.86889	10.566
ENSMUSG00000061758	Akr1b10	5.16869	4.55066	4.96407	5.20635	5.22914	5.32641	5.35783	5.19312	5.58707
ENSMUSG00000001642	Akr1b3	4.86456	4.83735	5.05074	5.95529	6.09573	6.01857	5.99775	5.93979	6.59259
ENSMUSG00000052131	Akr1b7	2.73388	2.58542	2.77615	2.97499	3.14574	2.80004	2.62545	2.17851	2.22085
ENSMUSG00000029762	Akr1b8	2.67422	2.65802	2.90431	3.14737	2.47868	2.89094	2.36903	2.56758	2.33546
ENSMUSG00000021211	Akr1c12	1.63719	1.71221	1.74378	1.88219	1.71479	1.28928	1.33925	1.5703	1.70736
ENSMUSG00000021213	Akr1c13	2.94149	4.08932	3.66354	3.62262	4.27166	3.9108	3.54207	3.79861	4.25051
ENSMUSG00000033715	Akr1c14	3.73831	3.69166	3.37437	4.03207	3.79708	4.14482	3.08553	3.19141	2.80912
ENSMUSG00000021214	Akr1c18	2.91517	2.50938	2.8931	3.85453	3.10596	3.42515	3.03034	2.35566	2.90263
ENSMUSG00000071551	Akr1c19	3.36405	3.30753	2.96551	3.52282	3.71761	3.64522	2.79454	3.27038	2.88071
ENSMUSG00000054757	Akr1c20	2.82664	2.81455	2.86319	3.40862	3.07063	3.58427	2.61477	2.80756	2.49331
ENSMUSG00000021207	Akr1c21	2.24028	2.17886	2.37925	2.4999	2.63075	2.43263	2.37542	1.93114	1.84491
ENSMUSG00000021210	Akr1c6	2.12289	2.47943	2.25657	2.13214	2.40708	1.95197	1.90457	1.81305	1.84765
ENSMUSG00000025955	Akr1cl	4.52031	4.4378	4.61402	4.81043	4.5405	4.36862	4.32165	4.51298	3.63853
ENSMUSG00000038641	Akr1d1	3.41766	3.516	3.33588	3.85298	4.12305	4.06077	3.39531	3.14257	3.50651
ENSMUSG00000045410	Akr1e1	4.35704	4.32927	4.65986	4.52272	4.98636	5.05368	4.6525	4.21987	5.10152
ENSMUSG00000028743	Akr7a5	3.48528	3.53938	3.24172	3.49023	3.10983	3.39768	3.87281	3.8218	3.81528
ENSMUSG00000001729	Akt1	11.9343	12.2205	11.8085	11.2525	11.3313	11.2121	12.5012	12.5386	12.4795
ENSMUSG00000011096	Akt1s1	7.77724	7.64202	7.57433	7.2594	7.18174	7.17029	7.83103	7.91347	8.14539
ENSMUSG00000004056	Akt2	10.163	10.2303	9.93363	10.1176	10.1278	10.0562	10.535	10.5018	10.529
ENSMUSG00000084347	Akt2-ps	4.31534	4.43265	4.54736	4.93028	4.80305	4.59669	5.07304	5.09308	4.86318
ENSMUSG00000019699	Akt3	8.4292	8.47134	8.43077	8.60023	8.59983	8.6107	9.09102	9.31406	9.26388
ENSMUSG00000031667	Aktip	8.76129	8.86855	8.63746	8.06357	8.17389	7.94143	8.43761	8.38181	8.59311
ENSMUSG00000098266	AL590625.1	-2.12674	-2.15354	-2.15235	-2.14331	-2.14528	-2.14542	-2.15246	-2.15183	-2.15022
ENSMUSG00000098804	AL590629.1	0	0	0	0	0	0	0	0	0
ENSMUSG00000099193	AL590968.1	0.211628	-0.30555	-0.301454	-0.269138	0.0300924	-0.115957	-0.301837	-0.17064	-0.293939
ENSMUSG00000098827	AL591205.1	1.55844	1.53405	1.82314	1.62337	1.713	1.44519	1.55665	1.83825	1.49477
ENSMUSG00000098992	AL591209.1	7.79958	7.58098	7.45753	7.68031	7.65881	7.51065	8.20712	8.0869	8.66563
ENSMUSG00000099125	AL593847.1	2.78942	2.50841	2.05263	2.53724	2.47986	2.59236	2.77153	3.25366	3.06117
ENSMUSG00000098546	AL593853.1	0	0	0	0	0	0	0	0	0
ENSMUSG00000098571	AL593853.2	0	0	0	0	0	0	0	0	0
ENSMUSG00000098467	AL593857.1	-1.55985	-1.55091	-1.54635	-1.51169	-1.4054	-1.40592	-1.43293	-1.54434	-1.53816
ENSMUSG00000098349	AL596090.1	1.05761	0.679255	0.801618	0.789682	0.767947	0.766445	0.900199	0.809154	0.71416
ENSMUSG00000098432	AL596125.1	0.657878	0.79702	0.511868	0.756182	0.427657	0.724842	0.622781	0.390629	0.533594
ENSMUSG00000098995	AL603745.1	0.479293	0.712295	0.630711	0.762212	0.43516	0.590482	0.730847	0.741921	0.407277
ENSMUSG00000099322	AL669834.1	0.144927	0.0484426	0.0538603	0.268276	0.526521	0.0864361	0.295846	0.186589	0.439184
ENSMUSG00000098271	AL669901.1	-0.0409481	-0.23696	-0.105916	-0.0270363	-0.206035	0.0987534	-0.233044	-0.23071	0.147837
ENSMUSG00000098577	AL669981.1	0.495512	0.444656	0.225728	0.586871	0.417609	0.260012	0.458926	0.353818	0.489392
ENSMUSG00000098638	AL670236.1	-1.01335	-0.894795	-0.886983	-0.971648	-0.98059	-0.84634	-1.00626	-0.773572	-1.00203
ENSMUSG00000098585	AL672071.1	0	0	0	0	0	0	0	0	0
ENSMUSG00000098899	AL672071.2	-2.16509	-2.1596	-2.15734	-2.14019	-2.14393	-2.08786	-2.15755	-2.15635	-2.15329
ENSMUSG00000099037	AL672224.1	-0.379006	-0.452943	-0.566733	-0.373722	-0.389226	-0.547421	-0.567031	-0.44023	-0.427967
ENSMUSG00000098364	AL807249.1	3.83982	3.81744	4.04072	3.06719	2.87342	3.10421	3.43012	3.82642	3.81986
ENSMUSG00000098455	AL807795.1	-1.1988	-1.18193	-1.17469	-1.25319	-1.14541	-1.26138	-1.28877	-1.2863	-1.28003
ENSMUSG00000098968	AL808026.1	-0.670497	-0.662729	-0.530782	-0.461698	-0.327646	-0.637718	-0.65975	-0.526756	-0.51423
ENSMUSG00000099155	AL808027.1	-0.218369	-0.0920333	-0.187454	-0.113079	-0.285323	-0.285775	-0.188321	0.0299094	-0.301556
ENSMUSG00000099273	AL844604.1	0.940918	0.98053	0.997051	1.28377	1.38552	2.00065	1.23074	1.12985	0.881401
ENSMUSG00000099304	AL845297.1	-0.218801	-0.184317	-0.416939	0.0886569	-0.39247	-0.392944	-0.417313	-0.415157	-0.269271
ENSMUSG00000098870	AL928926.1	0.177709	0.107051	0.117204	0.0325399	0.320879	0.0237571	0.116251	0.121746	0.363425
ENSMUSG00000098776	AL928966.1	-0.76776	-0.63735	-0.757408	-0.722843	-0.733391	-0.295366	-0.51354	-0.756034	-0.751765
ENSMUSG00000028393	Alad	4.35296	4.71157	4.76081	5.31074	5.06268	4.84125	4.84654	4.76376	5.276
ENSMUSG00000032786	Alas1	10.4237	10.1089	10.2696	11.9261	11.8984	11.8654	11.5273	11.7398	12.1931
ENSMUSG00000025270	Alas2	3.96332	4.17533	4.12663	4.46998	4.30003	4.34664	3.78346	3.81854	3.8499
ENSMUSG00000029368	Alb	3.51951	3.54078	3.14271	3.63341	3.46339	3.67496	3.06645	2.84983	3.08543
ENSMUSG00000022636	Alcam	11.2372	11.7616	11.1992	10.6275	10.618	10.4947	12.1953	12.2555	12.3256
ENSMUSG00000007833	Aldh16a1	8.71929	8.6277	8.40951	8.23107	8.2049	8.30666	9.87407	9.90367	10.0599
ENSMUSG00000025007	Aldh18a1	5.36222	4.9563	5.55872	5.08334	5.28407	5.1588	5.51105	5.47579	5.96874
ENSMUSG00000053279	Aldh1a1	2.90459	3.36155	3.01454	3.23453	3.06182	3.39169	3.13995	2.96547	2.68644
ENSMUSG00000013584	Aldh1a2	3.90773	3.64227	3.40841	4.42814	4.20877	4.08843	3.4029	3.13237	3.6473
ENSMUSG00000015134	Aldh1a3	4.24092	4.42415	4.40328	4.13552	3.55293	4.56534	3.91277	3.32827	3.69735
ENSMUSG00000024747	Aldh1a7	2.8957	2.71658	2.898	2.93684	2.76606	2.85964	2.52202	2.70792	2.5975
ENSMUSG00000035561	Aldh1b1	3.77606	3.75004	3.8161	4.49539	4.57066	4.08478	3.9117	3.73392	4.08993
ENSMUSG00000030088	Aldh1l1	4.30919	4.24315	4.24386	4.04658	4.07636	4.00394	3.79742	3.72176	3.47384
ENSMUSG00000020256	Aldh1l2	5.01943	5.44334	4.97096	5.05951	5.27891	4.96344	4.71685	4.85854	4.55985
ENSMUSG00000029455	Aldh2	12.9027	12.8995	12.6169	11.5412	11.6047	11.4372	11.2214	10.9848	10.9074
ENSMUSG00000019102	Aldh3a1	3.23774	3.20881	3.63549	3.27132	3.19161	3.44376	3.53469	3.34929	2.90439
ENSMUSG00000010025	Aldh3a2	10.7936	10.8525	10.6523	9.63966	9.67327	9.63808	10.7595	10.7585	11.0122
ENSMUSG00000024885	Aldh3b1	10.7961	10.8174	10.6694	10.669	10.6649	10.6416	10.5151	10.5916	10.649
ENSMUSG00000075296	Aldh3b2	4.50322	3.70097	4.09581	2.80679	3.32358	3.49779	3.80655	3.20057	3.10989
ENSMUSG00000028737	Aldh4a1	7.87154	7.4968	7.72132	5.94153	6.04421	5.9807	6.65342	6.82634	6.74274
ENSMUSG00000035936	Aldh5a1	4.84	4.33121	4.28103	4.85329	5.02602	4.93845	4.65385	4.62819	4.36942
ENSMUSG00000021238	Aldh6a1	6.61787	6.48685	6.73183	7.11324	6.97714	6.69103	6.68234	7.01162	7.44479
ENSMUSG00000053644	Aldh7a1	5.08158	4.82127	4.84462	4.6531	5.09015	5.11848	4.77582	4.41594	4.82951
ENSMUSG00000037542	Aldh8a1	4.26531	4.3513	4.15923	4.71065	4.02431	4.38294	3.97069	3.7346	3.99669
ENSMUSG00000026687	Aldh9a1	6.51201	5.8596	6.23048	6.7479	6.9006	6.86274	6.05973	6.49015	6.5981
ENSMUSG00000030695	Aldoa	13.447	13.7545	13.2349	14.4492	14.5191	14.4184	15.2676	15.2024	15.4931
ENSMUSG00000059343	Aldoart1	4.69493	4.84091	4.44552	5.31617	5.3968	5.54499	5.72398	5.63095	5.82592
ENSMUSG00000063129	Aldoart2	3.46784	3.26469	3.24941	3.8365	4.00775	3.80395	3.8268	3.7642	4.17245
ENSMUSG00000028307	Aldob	3.69386	3.672	4.15759	3.38983	3.94433	3.93714	3.62531	3.41689	3.56208
ENSMUSG00000017390	Aldoc	4.95923	5.12454	4.96595	6.92021	6.64144	6.73465	6.56935	6.29661	6.9371
ENSMUSG00000039427	Alg1	5.9299	5.76441	5.83984	6.07434	5.97431	5.83467	6.24629	6.17707	6.18779
ENSMUSG00000075470	Alg10b	7.36268	7.09183	7.41782	6.78921	7.17945	7.1088	7.00539	6.85361	7.53074
ENSMUSG00000063362	Alg11	6.25989	6.25763	6.09157	6.23423	6.61273	6.42824	6.42992	6.43374	7.04372
ENSMUSG00000035845	Alg12	6.62832	6.97316	6.63305	6.58829	6.44927	6.45741	7.11594	7.19844	7.31245
ENSMUSG00000041718	Alg13	5.75498	5.83014	6.21604	6.35389	6.22105	6.08114	5.40084	5.78927	6.34656
ENSMUSG00000039887	Alg14	4.05805	3.74558	3.52905	3.84337	4.20692	3.57292	3.85454	3.67718	4.47255
ENSMUSG00000039740	Alg2	7.12166	6.58483	7.30187	6.57035	6.3124	6.64813	6.12447	6.43647	6.25971
ENSMUSG00000033809	Alg3	4.01519	3.9914	3.92268	4.067	4.21739	4.02376	3.64738	4.0005	4.42978
ENSMUSG00000036632	Alg5	5.5796	5.72154	5.77866	5.85865	5.84937	5.8391	5.23249	5.83685	6.32823
ENSMUSG00000073792	Alg6	6.16929	5.66773	6.26617	6.3454	6.10437	5.97589	6.00569	5.80105	6.21433
ENSMUSG00000035704	Alg8	4.60995	4.12405	4.36745	4.85447	4.63414	4.41227	4.31989	4.58746	4.88895
ENSMUSG00000032059	Alg9	6.6387	6.26245	6.17668	6.83576	6.94284	7.16628	7.22677	7.18124	7.64901
ENSMUSG00000055471	Alk	4.8406	4.94846	4.95478	4.64406	4.63002	4.85576	4.47897	4.22359	4.37076
ENSMUSG00000079036	Alkbh1	6.55219	6.49454	6.33938	6.25612	6.02935	6.42593	6.55099	6.30367	6.7242
ENSMUSG00000044339	Alkbh2	2.62032	2.65222	2.69571	3.22097	2.96011	2.85611	3.16304	3.07388	3.01005
ENSMUSG00000040174	Alkbh3	6.80644	6.52257	6.76584	6.16542	6.15724	6.27734	6.3752	6.57799	6.44173
ENSMUSG00000039754	Alkbh4	6.67552	5.86673	6.63532	6.11032	6.39889	6.22876	6.31305	6.2313	6.27364
ENSMUSG00000042650	Alkbh5	9.9868	10.0862	9.76152	10.7315	10.6895	10.7295	11.9327	12.2526	12.2313
ENSMUSG00000042831	Alkbh6	5.76471	5.62846	5.73993	6.38687	6.38787	6.39529	5.80513	6.02363	6.37115
ENSMUSG00000002661	Alkbh7	4.46923	4.06189	3.93695	4.78164	4.22743	4.0155	4.61283	4.62273	4.39549
ENSMUSG00000025899	Alkbh8	5.14886	4.75114	5.06278	4.97784	4.84885	5.13644	4.7609	5.17687	5.3416
ENSMUSG00000020636	Allc	2.47977	2.58458	2.8401	3.06121	2.70235	2.88986	2.54479	2.28928	2.62432
ENSMUSG00000063810	Alms1	6.6365	6.09763	6.28491	5.97244	6.07912	6.13685	5.99299	5.99496	6.27837
ENSMUSG00000090256	Alms1-ps1	1.27281	1.53782	1.75771	2.01781	2.1583	1.59161	1.45311	1.67823	1.22939
ENSMUSG00000090098	Alms1-ps2	1.88638	1.69448	1.72565	1.74015	1.56952	1.42799	1.54042	1.33434	1.4782
ENSMUSG00000000320	Alox12	5.4541	5.06033	5.14471	4.25324	5.01885	5.12603	4.68331	4.46243	4.60935
ENSMUSG00000032807	Alox12b	3.68746	3.88792	3.8325	3.05894	3.20682	3.77513	3.73708	3.56893	2.91227
ENSMUSG00000018907	Alox12e	4.13436	3.95531	4.14398	3.74032	3.94342	4.12273	3.73647	3.406	3.41037
ENSMUSG00000018924	Alox15	7.11842	6.05836	6.64521	4.52239	4.53348	4.52463	5.62514	5.4878	5.16236
ENSMUSG00000025701	Alox5	12.6868	13.0003	12.5793	11.5508	11.5383	11.4793	12.4254	12.3892	12.193
ENSMUSG00000060063	Alox5ap	12.8034	13.1954	12.6303	12.369	12.4034	12.2821	13.9169	13.8022	13.9919
ENSMUSG00000020891	Alox8	4.58514	4.754	4.55593	4.12745	4.49274	3.86495	3.86464	3.60139	3.68645
ENSMUSG00000020892	Aloxe3	5.52194	5.35635	4.62202	5.11032	5.25076	5.24129	4.96817	4.69401	4.27146
ENSMUSG00000079440	Alpi	2.39257	2.68957	2.21278	2.35832	2.72111	2.62378	2.20958	2.12916	2.37048
ENSMUSG00000028028	Alpk1	8.09933	7.77032	8.17517	12.1537	12.1501	12.3008	11.1351	11.6373	12.6439
ENSMUSG00000032845	Alpk2	5.0221	5.03573	4.83249	4.91986	4.96557	4.63847	4.49362	4.18933	4.28875
ENSMUSG00000038763	Alpk3	4.82966	5.14548	5.09229	5.07731	4.61758	4.60906	4.17037	4.85906	4.5818
ENSMUSG00000028766	Alpl	4.0983	4.20491	3.98457	4.71114	3.66512	4.28361	3.88045	3.86421	3.95478
ENSMUSG00000026246	Alppl2	3.00513	2.92075	3.08891	2.61219	2.87571	2.96298	2.83779	2.13593	2.60576
ENSMUSG00000026024	Als2	7.76021	8.04667	7.79553	9.6017	9.47221	9.48693	9.70512	9.99584	9.96915
ENSMUSG00000044037	Als2cl	5.49278	5.01483	5.58842	5.03745	4.90683	4.64737	5.1668	4.91033	4.78303
ENSMUSG00000072295	Als2cr11	3.37096	3.94533	3.6371	4.24158	4.01504	3.66255	3.73646	3.35309	3.56791
ENSMUSG00000047383	Als2cr11	2.0702	2.30345	2.02349	2.15068	1.97555	2.3193	2.10899	2.21123	1.97954
ENSMUSG00000047528	Als2cr12	2.611	2.84783	3.06692	2.40322	2.47806	2.79309	2.69598	2.64558	2.43964
ENSMUSG00000036602	Alx1	2.95147	3.19434	3.3048	3.22053	3.14036	3.22088	2.92693	3.02438	2.57146
ENSMUSG00000014603	Alx3	2.41305	2.38099	2.49557	2.54481	2.58105	2.12838	2.16645	1.9794	2.41414
ENSMUSG00000040310	Alx4	4.90969	4.99769	4.8362	5.04924	5.15582	5.18215	4.36526	4.60548	4.27122
ENSMUSG00000025134	Alyref	7.53584	7.29926	7.50677	7.06668	7.21966	7.27705	8.04775	8.11471	8.61455
ENSMUSG00000060244	Alyref2	5.72561	5.69487	5.73469	5.11842	5.16073	5.15125	5.49951	5.79202	5.60427
ENSMUSG00000022244	Amacr	4.19815	3.6354	4.09009	3.97765	3.94802	3.6291	4.38118	4.07789	4.0796
ENSMUSG00000029288	Ambn	3.18959	3.0611	2.98391	3.20028	3.02844	3.28191	2.57986	2.85919	3.07462
ENSMUSG00000028356	Ambp	2.90099	2.96	3.11451	3.09405	3.26058	3.25413	5.45162	5.53167	6.02636
ENSMUSG00000040506	Ambra1	9.2812	9.23584	9.37686	9.46791	9.38801	9.38661	9.36201	9.93523	9.55639
ENSMUSG00000075232	Amd1	6.52766	6.52389	6.29188	6.41095	6.62486	6.7596	7.38888	7.55891	8.04253
ENSMUSG00000063953	Amd2	1.78916	1.70705	1.82353	1.4021	1.53372	1.9104	1.82056	1.99767	1.57818
ENSMUSG00000015890	Amdhd1	2.60169	2.89017	2.76402	2.57618	2.72188	2.39593	2.62426	2.21815	2.15111
ENSMUSG00000036820	Amdhd2	9.04891	9.34311	8.76393	9.12881	9.15486	8.96542	10.3928	10.5415	10.3006
ENSMUSG00000083823	Amd-ps1	1.3861	2.00327	1.5619	1.47916	1.58968	1.44774	1.90087	1.75954	1.49737
ENSMUSG00000060096	Amd-ps3	-1.85773	-1.85068	-1.84778	-1.82576	-1.83055	-1.83089	-1.84805	-1.77416	-1.77023
ENSMUSG00000019836	Amd-ps4	-0.511104	-0.287649	-0.175962	-0.472589	-0.481236	-0.481619	-0.382654	-0.377964	-0.365854
ENSMUSG00000031354	Amelx	2.20413	2.05616	2.41281	2.34404	2.28761	2.3904	1.98927	2.27844	2.04556
ENSMUSG00000050332	Amer1	5.34784	5.05211	5.67647	5.5086	6.1199	5.86203	5.31132	5.47431	5.63943
ENSMUSG00000021986	Amer2	10.3515	10.9625	10.3264	8.44465	8.26673	8.24848	11.2426	11.3706	10.9822
ENSMUSG00000045174	Amer3	3.61202	3.57141	3.54223	3.40332	3.13851	2.92845	2.85333	2.79192	3.10425
ENSMUSG00000031751	Amfr	12.1831	12.2455	11.9819	11.7609	11.7203	11.618	11.4199	11.4516	11.7277
ENSMUSG00000035262	Amh	3.96727	4.18108	3.99737	3.86279	3.38813	3.67182	4.6971	4.65484	4.53516
ENSMUSG00000023047	Amhr2	4.60777	4.56682	4.71111	4.37475	3.79195	3.78492	5.29888	5.4029	4.94904
ENSMUSG00000048534	Amica1	12.994	13.4818	12.9201	11.0961	11.0382	11.0767	12.6867	12.6913	12.8761
ENSMUSG00000050947	Amigo1	6.21236	6.49841	6.46798	5.85843	5.88305	5.87264	6.30585	6.43011	6.17593
ENSMUSG00000048218	Amigo2	3.80249	3.63853	3.54832	3.95595	3.71991	3.2088	3.23627	3.26554	3.41039
ENSMUSG00000032593	Amigo3	5.51648	5.39929	5.57327	5.47163	5.50787	5.68395	5.83973	6.23607	6.11068
ENSMUSG00000042225	Ammecr1	7.86588	7.80735	8.09329	6.84032	6.94529	6.94814	7.39684	7.85551	7.82898
ENSMUSG00000041915	Ammecr1l	8.39779	8.33631	8.34718	8.53444	8.40051	8.46598	9.01587	9.34557	9.35472
ENSMUSG00000021278	Amn	3.22098	2.91396	2.88229	3.03641	2.72199	3.16613	3.57362	4.01897	3.96213
ENSMUSG00000068250	Amn1	8.52845	8.99089	8.60279	9.26563	9.11477	9.14411	9.55375	9.78176	9.93923
ENSMUSG00000041688	Amot	4.38892	4.96582	4.70429	5.47818	5.67181	5.66184	5.24731	5.14278	5.38747
ENSMUSG00000013076	Amotl1	5.31187	5.41853	5.02714	5.55116	5.08808	5.33614	4.93371	5.09189	4.06053
ENSMUSG00000032531	Amotl2	7.06297	7.06918	7.03484	7.40834	7.48213	7.30869	7.88393	7.82882	7.93879
ENSMUSG00000070385	Ampd1	3.96051	4.40454	3.99681	4.47637	3.79256	3.86166	3.6851	4.15715	3.54464
ENSMUSG00000027889	Ampd2	9.1021	8.88517	8.97093	8.34031	8.45338	8.36934	7.89116	7.9792	8.02352
ENSMUSG00000005686	Ampd3	11.2431	11.3632	11.2338	9.97974	10.0265	10.1135	11.0313	11.4225	11.2489
ENSMUSG00000021314	Amph	4.10595	4.21472	4.1334	4.31673	4.42001	4.07537	3.85357	3.60396	3.31455
ENSMUSG00000032607	Amt	4.92728	5.24549	4.84063	5.08023	4.94918	5.06669	5.30195	5.02581	5.02005
ENSMUSG00000029282	Amtn	2.52046	2.26857	2.39077	2.48466	2.81389	2.72184	2.38706	2.23005	1.93836
ENSMUSG00000074264	Amy1	6.40147	6.22955	6.45755	5.3295	5.312	5.30222	5.69975	5.69127	5.7128
ENSMUSG00000070360	Amy2a1	-0.553329	-0.658475	-0.654939	-0.288226	-0.313409	-0.632093	-0.65527	-0.653362	-0.504913
ENSMUSG00000096569	Amy2a2	0	0	0	0	0	0	0	0	0
ENSMUSG00000093931	Amy2a3	0	0	0	0	0	0	0	0	0
ENSMUSG00000096770	Amy2a4	0	0	0	0	0	0	0	0	0
ENSMUSG00000074268	Amy2a5	0	0	0	0	0	0	0	0	0
ENSMUSG00000083079	Amy2b	1.74253	1.72098	2.31092	1.82819	2.33965	1.91375	1.74595	1.76079	1.56113
ENSMUSG00000081506	Amy2-ps1	2.15305	1.84076	1.76343	2.09194	2.46134	2.15656	1.9637	1.88182	2.11982
ENSMUSG00000050022	Amz1	6.43425	6.23875	6.32247	6.18197	6.14996	6.37397	7.05328	7.03745	7.13202
ENSMUSG00000020610	Amz2	8.96819	9.42687	8.95545	9.59785	9.62256	9.59459	9.64586	9.88169	9.94879
ENSMUSG00000014355	Anapc1	9.02942	8.47291	9.01291	8.73016	8.73496	8.73128	8.40371	8.53302	8.74751
ENSMUSG00000036977	Anapc10	5.86059	5.3617	5.72509	6.26171	5.89218	5.85542	6.09345	6.18603	6.54371
ENSMUSG00000025135	Anapc11	7.29008	7.0532	7.04411	7.1024	7.18191	7.23888	7.33964	7.46942	7.53101
ENSMUSG00000035048	Anapc13	5.68911	5.54956	5.88869	5.39039	5.25182	4.79742	5.2257	4.93006	5.81979
ENSMUSG00000030649	Anapc15	6.79572	6.37751	6.51958	5.99517	6.0063	5.77491	6.69615	6.56254	7.10378
ENSMUSG00000074780	Anapc15-ps	1.13758	1.05099	0.983395	0.874225	0.851882	0.69749	0.981413	0.778998	0.796589
ENSMUSG00000020107	Anapc16	7.70622	7.86527	7.58468	7.23726	7.71907	7.6112	8.96979	8.86611	9.18253
ENSMUSG00000026965	Anapc2	9.03962	8.95891	8.96316	8.62584	8.70516	8.71041	9.13232	9.73177	9.27147
ENSMUSG00000029176	Anapc4	9.0926	9.2465	9.07396	8.72308	8.57014	8.45859	9.34367	9.50909	9.71411
ENSMUSG00000029472	Anapc5	8.65689	8.07703	8.55659	8.10702	8.16821	8.22345	8.92849	8.79585	9.48446
ENSMUSG00000029466	Anapc7	7.94175	7.80329	7.89258	7.27415	7.54817	7.34552	8.21175	8.26706	8.16607
ENSMUSG00000072115	Ang	3.99315	4.12887	3.94976	4.60757	4.69448	4.36217	5.15697	5.0137	5.15146
ENSMUSG00000047894	Ang2	1.08139	1.31967	1.03265	1.43552	1.12403	1.39163	1.24848	1.35825	1.05987
ENSMUSG00000060615	Ang4	1.73387	1.64728	1.35352	2.23076	1.60802	1.60535	1.35182	1.69	1.62603
ENSMUSG00000053961	Ang5	0.155427	0.182275	0.312247	0.440154	0.0974507	0.665817	0.192531	0.0648111	0.0727917
ENSMUSG00000072598	Ang6	1.23857	1.48616	1.68923	1.47475	1.43846	1.89524	1.06339	1.42743	1.22331
ENSMUSG00000021257	Angel1	4.56412	4.27412	4.68637	4.83266	4.97532	4.83924	4.57621	5.14134	4.7608
ENSMUSG00000026634	Angel2	9.52548	9.77634	9.44831	9.01191	9.07547	8.95219	10.6257	10.6677	10.9243
ENSMUSG00000090180	Ang-ps1	-0.0297773	-0.10339	-0.218387	-0.0154365	0.110477	-0.192801	-0.094524	-0.2165	0.0461312
ENSMUSG00000093889	Ang-ps2	0.542869	0.678385	0.796985	0.679164	0.501595	0.796673	0.888355	0.806237	0.472462
ENSMUSG00000095873	Ang-ps3	-0.0714812	-0.170676	0.0800123	0.0450035	0.307209	0.0257703	-0.0376964	-0.16384	-0.157297
ENSMUSG00000022309	Angpt1	4.74739	4.02837	4.26956	4.74319	4.0556	4.35966	4.22227	3.82137	4.02525
ENSMUSG00000031465	Angpt2	5.72658	5.99369	5.85082	5.22512	4.79429	4.67244	6.41997	5.9702	5.37682
ENSMUSG00000027460	Angpt4	4.10719	3.97102	4.16947	3.94241	3.98948	4.05042	4.24204	4.73017	3.66054
ENSMUSG00000033544	Angptl1	3.79165	3.60092	3.76489	3.65032	3.98542	4.1491	3.60436	3.45982	2.98095
ENSMUSG00000004105	Angptl2	8.31172	7.93704	8.66397	5.71705	5.73903	6.14796	6.47668	7.25403	6.15145
ENSMUSG00000028553	Angptl3	4.25818	4.44451	4.33501	4.91059	4.82681	4.85919	4.06216	4.10023	4.14565
ENSMUSG00000002289	Angptl4	4.1517	4.11009	4.05242	4.53741	4.00312	4.1286	4.09031	3.88682	4.17792
ENSMUSG00000038742	Angptl6	3.35743	3.08111	3.20518	3.62439	3.99456	3.60246	3.39319	3.2976	3.56437
ENSMUSG00000028989	Angptl7	4.84699	4.63935	4.99191	4.59936	4.0986	4.57842	4.14559	4.84237	4.12884
ENSMUSG00000022265	Ank	6.24747	6.24323	6.29989	7.28042	7.31577	7.36471	7.09063	7.43706	7.31065
ENSMUSG00000031543	Ank1	5.85168	6.20572	5.928	6.0673	6.1052	6.05021	5.53267	5.51511	5.44184
ENSMUSG00000032826	Ank2	7.20446	7.23311	7.0962	7.77933	7.56016	7.62626	7.14839	7.17153	7.24441
ENSMUSG00000069601	Ank3	7.21181	7.19582	7.34844	7.38653	7.39888	7.28614	6.75745	6.53754	6.29419
ENSMUSG00000039342	Ankar	3.75809	4.045	4.15372	4.05828	3.8134	4.01192	4.02721	3.67001	3.25883
ENSMUSG00000066510	Ankdd1a	4.63866	4.95646	4.84206	4.95097	5.55577	5.4017	7.59906	8.08088	7.74302
ENSMUSG00000047117	Ankdd1b	4.54509	4.84679	4.73096	4.4958	4.6514	4.6429	4.69281	4.10014	4.51914
ENSMUSG00000074771	Ankef1	4.45227	4.97077	4.35368	4.41605	4.23897	4.91474	4.13622	4.22005	3.69506
ENSMUSG00000047773	Ankfn1	3.64304	3.71146	4.15149	3.8266	4.11528	3.72177	3.7704	3.18729	3.08686
ENSMUSG00000020790	Ankfy1	11.0319	10.9529	11.0133	10.7986	10.7285	10.7557	11.1601	11.3669	11.386
ENSMUSG00000024483	Ankhd1	11.3602	11.6362	11.3744	11.122	11.0528	11.0657	12.0805	12.4305	12.183
ENSMUSG00000040351	Ankib1	8.90226	8.83399	8.70953	8.4831	8.71465	8.4867	8.99037	9.15743	9.34093
ENSMUSG00000032257	Ankk1	2.46372	3.28521	2.88904	2.95554	2.46054	2.45658	2.60848	2.46438	2.2046
ENSMUSG00000046295	Ankle1	5.72589	4.54828	5.81162	3.99806	3.60585	3.7947	4.75276	4.85799	4.87585
ENSMUSG00000029501	Ankle2	9.96624	10.2289	9.86246	9.96702	9.89112	9.83244	10.1349	10.3046	10.3394
ENSMUSG00000034212	Ankmy1	4.23168	4.28849	4.18397	3.78527	3.98671	4.16599	3.77518	3.64007	3.37195
ENSMUSG00000036188	Ankmy2	4.5712	4.51263	4.81948	4.98489	4.71605	4.60513	4.58373	4.79374	5.28694
ENSMUSG00000021661	Ankra2	7.93252	8.02631	7.92736	7.40753	7.4991	7.354	8.15403	8.3907	8.40123
ENSMUSG00000024803	Ankrd1	4.13991	4.36094	3.88039	4.64328	4.46815	4.61728	4.87187	4.57978	5.02546
ENSMUSG00000031508	Ankrd10	6.29868	5.99425	6.04281	6.43576	6.12567	6.31015	6.84729	6.73595	6.89772
ENSMUSG00000035569	Ankrd11	12.4124	12.5861	12.4832	12.2163	12.2713	12.222	12.5539	12.9819	12.4979
ENSMUSG00000034647	Ankrd12	11.1631	11.3628	11.2918	10.4158	10.2715	10.1727	11.5481	11.826	11.8958
ENSMUSG00000041870	Ankrd13a	11.9203	12.0184	11.8287	11.9826	12.0139	11.8735	11.5524	11.6648	11.7564
ENSMUSG00000037907	Ankrd13b	3.57926	3.55426	3.61577	3.53937	3.17651	3.67284	3.45154	3.29927	3.23111
ENSMUSG00000039988	Ankrd13c	8.59254	8.63801	8.41764	8.67715	8.62658	8.47869	8.51412	8.70973	8.88095
ENSMUSG00000005986	Ankrd13d	8.91721	9.182	8.80661	9.08051	9.04634	8.68603	8.46331	8.49999	8.18289
ENSMUSG00000047909	Ankrd16	9.51923	9.42971	9.50157	8.49505	8.47442	8.36745	8.74755	8.82658	8.83538
ENSMUSG00000055204	Ankrd17	10.3646	10.3867	10.4284	9.5738	9.58164	9.54257	10.6282	11.0374	10.7945
ENSMUSG00000025172	Ankrd2	3.70205	3.25429	3.53614	2.99489	3.3338	3.49386	3.24129	3.39577	3.64536
ENSMUSG00000024774	Ankrd22	10.5157	10.7881	10.4461	10.397	10.3509	10.3556	11.3726	11.3524	11.6354
ENSMUSG00000067653	Ankrd23	5.68758	5.72885	5.54559	5.13877	5.00407	5.32655	5.81173	6.01643	5.91666
ENSMUSG00000054708	Ankrd24	5.6177	5.58083	5.53783	5.5869	5.57238	5.6217	5.05222	5.40599	5.09194
ENSMUSG00000007827	Ankrd26	5.30211	5.00596	5.34134	5.4144	5.44928	5.64955	5.2142	5.2352	5.47564
ENSMUSG00000034867	Ankrd27	8.38795	8.255	8.3321	7.82615	7.82492	7.96208	8.45099	8.50356	8.44604
ENSMUSG00000014496	Ankrd28	10.4584	9.97354	10.4808	7.2997	7.48321	7.32548	9.24587	9.20378	9.38507
ENSMUSG00000057766	Ankrd29	3.67993	3.75922	3.94796	3.64813	3.47409	3.698	3.28869	3.0201	2.99828
ENSMUSG00000021597	Ankrd32	6.09705	6.07367	6.44672	5.64212	5.56536	5.48749	6.01673	6.00506	6.2825
ENSMUSG00000047034	Ankrd33	3.16812	2.47877	3.07635	2.54102	2.09093	2.6859	2.25882	2.06716	2.10766
ENSMUSG00000022237	Ankrd33b	11.7889	12.0531	11.7503	10.6526	10.6232	10.6881	12.0646	12.1863	11.8672
ENSMUSG00000049097	Ankrd34a	3.17134	3.47769	3.212	2.75504	2.80719	3.26047	2.9625	2.59535	2.73778
ENSMUSG00000045034	Ankrd34b	3.49935	3.6045	3.50691	3.68014	3.66333	4.04063	3.50132	3.53347	3.02951
ENSMUSG00000047606	Ankrd34c	3.47792	3.35892	3.1247	3.54093	3.28956	3.58501	2.64476	2.84815	2.62064
ENSMUSG00000038354	Ankrd35	4.42308	4.83367	4.52988	4.62506	4.50538	4.54939	4.52273	4.45515	3.72921
ENSMUSG00000020481	Ankrd36	4.67061	4.94279	4.75672	4.48899	5.06794	4.77828	4.10341	4.36905	3.89726
ENSMUSG00000050914	Ankrd37	5.657	6.70092	5.49283	8.88879	8.90887	8.73996	10.2841	10.3948	10.9586
ENSMUSG00000079610	Ankrd39	4.88374	4.78048	4.89087	4.38045	4.51728	4.32496	5.18717	5.08883	5.20231
ENSMUSG00000020864	Ankrd40	7.86218	7.48875	7.84255	7.50536	7.74159	7.44008	7.23476	7.0787	7.3971
ENSMUSG00000041343	Ankrd42	4.72303	5.04497	4.50964	4.83282	5.09208	5.15505	4.29834	4.46562	4.52845
ENSMUSG00000052331	Ankrd44	13.1211	13.2762	13.1548	12.474	12.5069	12.4439	12.8954	13.2765	13.0728
ENSMUSG00000044835	Ankrd45	3.72599	3.84758	3.87044	3.97308	3.93615	3.86352	3.50134	2.82923	3.67672
ENSMUSG00000048307	Ankrd46	8.7939	8.55567	8.80526	7.76493	7.91911	7.73496	8.1215	8.09162	8.45256
ENSMUSG00000031931	Ankrd49	5.73661	5.50521	5.69504	6.00823	5.1964	5.45591	5.96006	6.04059	6.79615
ENSMUSG00000044864	Ankrd50	7.78285	7.57394	7.54137	7.7353	7.6911	7.44004	8.26454	8.08499	8.38293
ENSMUSG00000014498	Ankrd52	8.9949	8.79355	9.08249	8.22114	8.30778	8.42124	8.78104	9.43685	8.7306
ENSMUSG00000014747	Ankrd53	4.36949	4.33359	4.33549	4.07796	4.04509	4.10546	4.17041	4.50955	4.06909
ENSMUSG00000033055	Ankrd54	6.71119	6.33385	6.63412	6.46283	6.60713	6.47259	6.88954	6.87199	7.12759
ENSMUSG00000049985	Ankrd55	3.88207	3.81814	3.69687	3.53879	3.53647	4.28355	3.92182	2.79214	3.14222
ENSMUSG00000040183	Ankrd6	5.52695	5.5026	5.37656	5.10634	4.97408	5.27985	4.57451	4.9605	4.91127
ENSMUSG00000027517	Ankrd60	2.19451	2.22969	2.2705	1.93653	2.24552	1.75307	2.11662	1.64177	1.79099
ENSMUSG00000029607	Ankrd61	6.74306	6.92399	7.03133	6.48314	6.62653	6.31494	6.87249	7.1443	7.0513
ENSMUSG00000078137	Ankrd63	4.06877	4.11806	4.46306	3.22484	3.35196	3.43848	3.33814	3.14917	3.37657
ENSMUSG00000078487	Ankrd65	1.16103	1.23378	1.00573	0.732813	1.01304	0.718569	0.903016	0.799779	0.817694
ENSMUSG00000096140	Ankrd66	5.32256	5.34392	5.4373	7.76361	7.90516	7.77992	5.9306	6.59256	6.79243
ENSMUSG00000029517	Ankrd7	1.79967	1.45247	1.99634	1.64531	1.73571	1.60502	1.8435	1.24014	1.51394
ENSMUSG00000037904	Ankrd9	7.36698	6.78694	7.20397	5.18909	4.95113	4.83663	5.30646	5.22031	5.50463
ENSMUSG00000024219	Anks1	10.4852	10.4856	10.4008	10.2687	10.2361	10.4011	10.3413	10.517	10.315
ENSMUSG00000058589	Anks1b	6.44953	6.32986	6.05883	6.7185	6.44132	6.5499	5.8723	5.44869	5.38538
ENSMUSG00000022515	Anks3	8.84918	8.92141	8.69204	7.67771	7.95527	7.86069	8.89401	8.91353	8.91927
ENSMUSG00000030909	Anks4b	2.85103	3.47506	2.87855	3.79017	3.25792	3.25202	2.70655	2.89993	2.88108
ENSMUSG00000066191	Anks6	5.92161	6.34517	5.76591	4.10125	4.53867	4.31581	7.20422	7.28188	6.82297
ENSMUSG00000026199	Ankzf1	9.39171	9.28375	9.29162	9.24673	9.16382	9.06118	9.2836	9.45038	9.50051
ENSMUSG00000036777	Anln	8.48865	7.3965	8.40968	6.60785	5.9673	6.37389	7.47719	7.54362	7.92988
ENSMUSG00000031075	Ano1	4.62903	4.5945	4.79504	4.77975	4.44313	4.49138	4.25498	4.42094	4.93945
ENSMUSG00000037949	Ano10	10.9469	10.7642	10.8672	9.70442	9.74743	9.59509	9.27643	9.45516	9.42268
ENSMUSG00000038115	Ano2	4.67274	5.05521	5.13967	5.21347	5.29717	5.14704	4.73598	4.74559	4.40673
ENSMUSG00000074968	Ano3	4.98009	4.62246	5.23	5.70759	5.22443	5.10455	4.72949	4.51517	4.12962
ENSMUSG00000035189	Ano4	4.70494	4.88024	4.39603	5.347	5.17607	5.36343	4.78234	3.98648	4.25097
ENSMUSG00000055489	Ano5	4.58825	4.72848	4.9522	5.14652	5.26581	5.18932	4.49821	4.46115	3.73902
ENSMUSG00000064210	Ano6	10.0335	10.0871	10.0479	9.9738	10.2076	10.2121	10.1503	10.4042	10.5625
ENSMUSG00000034107	Ano7	4.30231	4.25238	4.07931	4.13965	4.1014	4.33634	4.70121	3.91358	3.94965
ENSMUSG00000034863	Ano8	5.58366	5.38649	5.21208	5.63626	5.38929	5.66922	5.84284	5.85885	6.20099
ENSMUSG00000054662	Ano9	4.6384	4.41102	4.35264	3.93299	4.04927	4.28601	3.97977	3.69461	3.34406
ENSMUSG00000032249	Anp32a	10.6784	10.8796	10.5582	10.0198	10.1267	10.0997	10.8987	10.8263	11.1721
ENSMUSG00000028333	Anp32b	7.77209	7.43696	7.41819	7.32085	7.42075	7.19225	7.33082	7.61789	8.00271
ENSMUSG00000081792	Anp32b-ps1	3.124	3.00134	3.19242	3.82982	3.36309	3.72297	3.04785	3.40256	2.98209
ENSMUSG00000097478	Anp32b-ps1	0	0	0	0	0	0	0	0	0
ENSMUSG00000015749	Anp32e	7.92148	6.72185	7.7455	6.76087	6.76968	6.99275	7.45562	7.55721	8.02822
ENSMUSG00000069913	Anp32-ps	1.60303	1.57944	1.60463	1.52508	1.76019	1.63148	1.86498	1.7119	1.84436
ENSMUSG00000039062	Anpep	4.96883	4.66203	5.04042	5.35972	5.0721	4.97979	4.86091	5.4477	4.95254
ENSMUSG00000033420	Antxr1	4.80445	4.75574	4.8079	4.54269	4.53588	4.77062	4.58416	4.08736	4.01731
ENSMUSG00000029338	Antxr2	11.8734	12.4113	11.7753	12.0033	11.9998	11.9718	12.5037	12.713	12.9479
ENSMUSG00000047441	Antxrl	3.61906	3.77761	3.27247	3.53869	3.53084	3.74164	3.19987	3.53819	2.8817
ENSMUSG00000024659	Anxa1	14.4944	14.3297	14.27	11.65	11.7306	11.5732	13.1747	13.0794	13.5887
ENSMUSG00000031635	Anxa10	2.27433	2.29616	2.06023	2.42484	2.57553	2.83251	2.24681	1.96565	2.31724
ENSMUSG00000021866	Anxa11	11.0442	10.8245	10.9984	10.237	10.2686	10.1667	10.9073	11.2565	10.7977
ENSMUSG00000055114	Anxa13	1.44938	1.52062	1.63198	1.42272	1.24814	1.38559	1.15191	1.16023	1.41192
ENSMUSG00000032231	Anxa2	13.1026	13.5319	12.9581	13.6117	13.653	13.4652	13.8531	13.8671	14.1233
ENSMUSG00000029484	Anxa3	10.3268	10.5845	10.2608	10.106	10.0676	10.0521	9.9789	9.91806	10.4607
ENSMUSG00000029994	Anxa4	6.66553	7.02581	6.8177	7.86599	7.90281	7.65286	7.83742	7.72067	8.39673
ENSMUSG00000027712	Anxa5	10.2452	10.4043	10.133	9.93666	9.94243	9.98487	10.3264	10.2718	10.9363
ENSMUSG00000018340	Anxa6	9.56508	9.13972	9.448	9.51725	9.47506	9.30308	9.77526	9.43077	9.75122
ENSMUSG00000021814	Anxa7	9.33011	8.85825	9.18277	8.98244	8.74742	8.71415	9.36162	9.51254	10.0194
ENSMUSG00000021950	Anxa8	2.4187	2.84562	2.56379	2.80285	2.40924	2.72767	2.76985	2.50267	2.03694
ENSMUSG00000015702	Anxa9	7.42771	7.46356	7.57601	6.8158	6.80125	6.64344	7.28194	7.43995	7.45944
ENSMUSG00000021322	Aoah	8.85007	8.56043	8.96385	10.3698	10.3781	10.5762	8.72285	9.50653	10.4035
ENSMUSG00000029811	Aoc1	4.05956	3.60349	3.61273	3.65314	4.21038	3.46898	3.71176	3.46284	3.25293
ENSMUSG00000078651	Aoc2	6.32609	6.29239	6.09253	6.42118	6.15767	6.21297	6.47268	6.71277	6.30847
ENSMUSG00000019326	Aoc3	4.50264	4.36575	4.50843	4.14636	4.69598	4.34427	4.3261	3.47687	3.55885
ENSMUSG00000063558	Aox1	6.3805	6.7582	6.53527	6.1785	6.23127	6.50558	5.68913	5.92671	6.1398
ENSMUSG00000079554	Aox2	5.07852	5.12687	4.71998	5.03108	5.02185	4.50629	4.39234	4.16402	3.70929
ENSMUSG00000064294	Aox3	5.19644	5.29217	5.17936	5.4181	4.88418	5.30501	4.6822	4.72539	4.21183
ENSMUSG00000038242	Aox4	5.19435	5.40826	5.01554	5.43844	5.68623	5.42143	4.54807	4.55076	4.16721
ENSMUSG00000074238	Ap1ar	5.87047	5.29799	5.77983	7.45406	7.48874	7.29786	6.4703	7.03834	7.54584
ENSMUSG00000009090	Ap1b1	8.48546	8.35078	8.38805	8.30133	7.88926	7.94386	8.37512	8.54349	8.56208
ENSMUSG00000031731	Ap1g1	10.6817	10.8606	10.6949	10.655	10.5652	10.5615	10.9581	11.1892	11.1119
ENSMUSG00000096262	Ap1g1	8.38624	8.63823	8.42607	8.43422	8.2804	8.28568	8.67855	8.81156	8.89475
ENSMUSG00000040701	Ap1g2	7.35497	7.20461	7.42812	6.38428	6.58611	6.44663	6.56589	6.87267	6.9981
ENSMUSG00000003033	Ap1m1	9.76812	9.81203	9.72223	8.80763	8.85119	8.99368	9.72662	10.0495	9.46723
ENSMUSG00000003309	Ap1m2	4.49622	4.20518	4.31206	3.67786	3.39768	3.66438	3.75881	3.68266	3.88209
ENSMUSG00000004849	Ap1s1	5.63755	5.4912	5.72858	6.55981	6.43963	6.67621	6.12319	6.09952	7.2387
ENSMUSG00000031367	Ap1s2	11.6938	11.8367	11.7518	10.1414	10.0752	10.0224	10.4434	10.71	10.9016
ENSMUSG00000054702	Ap1s3	5.61978	5.27506	5.71316	5.25353	5.07582	5.14935	5.10908	5.56942	5.27143
ENSMUSG00000060279	Ap2a1	8.80685	8.6138	8.76001	8.62574	8.60033	8.54135	9.10017	9.45108	9.20484
ENSMUSG00000002957	Ap2a2	10.1054	9.86099	9.92733	9.95051	10.1843	10.0178	9.54836	9.58962	9.82293
ENSMUSG00000035152	Ap2b1	10.1891	10.1326	10.1392	10.3376	10.34	10.3278	10.7039	10.9581	11.0622
ENSMUSG00000022841	Ap2m1	9.14854	9.14341	9.01855	8.95633	8.9613	9.05377	9.40803	9.46119	9.80043
ENSMUSG00000008036	Ap2s1	8.71611	8.36387	8.32723	8.31889	8.50615	8.52296	8.43636	8.23502	8.89699
ENSMUSG00000021686	Ap3b1	10.2962	10.4141	10.3371	9.93542	9.99071	9.92749	10.3194	10.4954	10.557
ENSMUSG00000062444	Ap3b2	5.08576	4.99521	4.97757	4.92739	4.84541	4.79129	4.29575	4.57889	4.07717
ENSMUSG00000020198	Ap3d1	10.9161	11.1191	10.7797	10.8696	10.8901	10.7881	11.7429	11.7875	11.7065
ENSMUSG00000021824	Ap3m1	10.7309	10.4582	10.7247	10.2831	10.2279	10.1929	9.91569	10.1309	10.5545
ENSMUSG00000094683	Ap3m1-ps	0.250884	0.156683	0.402291	0.207021	0.630941	0.355848	0.287271	0.293285	0.542962
ENSMUSG00000031539	Ap3m2	6.23428	6.00685	6.21028	6.44892	5.89079	6.20412	5.57538	5.46728	5.68281
ENSMUSG00000024480	Ap3s1	8.43653	8.29938	8.30329	8.80222	8.77082	8.67085	8.8984	9.2002	9.67383
ENSMUSG00000085611	Ap3s1-ps1	0.513797	0.734807	0.4576	0.547248	0.373428	0.372717	0.664705	0.573904	0.595962
ENSMUSG00000094257	Ap3s1-ps2	3.16153	3.25224	3.02169	2.4655	2.41616	3.17004	2.95035	3.38551	2.97139
ENSMUSG00000063801	Ap3s2	6.76151	6.39023	6.23825	6.50174	6.36514	6.68278	6.1446	6.43576	6.38309
ENSMUSG00000032952	Ap4b1	9.14762	8.91602	9.14806	8.24839	8.48739	8.42482	8.50847	8.51159	8.75964
ENSMUSG00000001998	Ap4e1	7.59142	7.29228	7.53674	7.91406	7.91172	7.78131	7.65625	7.88627	8.06287
ENSMUSG00000019518	Ap4m1	6.25574	5.73152	6.17926	6.42043	6.61204	6.35464	6.34229	6.4305	6.63241
ENSMUSG00000020955	Ap4s1	6.88889	6.71756	6.78917	5.50949	5.5534	5.43295	6.85053	7.07254	6.94821
ENSMUSG00000049562	Ap5b1	10.6825	10.4787	10.5063	9.11916	9.18127	9.12074	9.55045	9.53958	9.47235
ENSMUSG00000036291	Ap5m1	8.24724	8.25582	8.17916	7.25208	7.36313	7.22631	8.2383	8.37257	8.62543
ENSMUSG00000068264	Ap5s1	6.20756	6.80375	6.09186	7.20097	7.50009	7.1831	7.67155	7.57277	7.58714
ENSMUSG00000039623	Ap5z1	7.99496	7.90256	7.87908	6.63089	6.74125	6.41909	7.55216	7.59541	7.51225
ENSMUSG00000019979	Apaf1	10.8696	10.7178	10.8178	10.7878	10.8486	10.725	10.9352	11.1504	11.2731
ENSMUSG00000024897	Apba1	5.61868	5.08398	5.1969	5.80652	5.68966	5.97755	5.26461	5.15454	5.29969
ENSMUSG00000030519	Apba2	3.70501	3.59071	3.70534	3.80242	3.70488	4.29035	3.74892	3.08386	3.15354
ENSMUSG00000004931	Apba3	6.9212	6.81556	6.67488	7.45942	7.24806	7.33557	8.0981	8.22666	8.65531
ENSMUSG00000037032	Apbb1	4.08756	3.70074	4.20816	3.65103	3.47292	3.85075	3.29722	3.32723	3.40373
ENSMUSG00000026786	Apbb1ip	11.8275	12.1024	12.1326	11.3345	11.3224	11.4196	11.878	12.7059	12.0156
ENSMUSG00000029207	Apbb2	5.53771	5.7451	5.53314	6.05734	5.80338	5.97102	5.94224	5.928	5.79987
ENSMUSG00000001379	Apbb3	6.69408	6.8627	6.87285	7.1062	7.40172	6.98615	7.68034	7.84624	8.06202
ENSMUSG00000005871	Apc	10.3716	10.4446	10.3939	9.7987	9.7801	9.7404	10.5119	10.9175	10.8124
ENSMUSG00000020135	Apc2	6.93915	7.04545	6.84307	6.50047	6.42409	6.24488	7.48722	7.32865	7.35501
ENSMUSG00000071847	Apcdd1	2.75884	2.75392	2.65579	2.56561	2.92586	3.30727	2.7974	2.41501	2.24942
ENSMUSG00000083152	Apc-ps1	5.40017	5.27701	5.84754	5.88798	5.65684	6.14933	5.01344	5.59992	5.11337
ENSMUSG00000026542	Apcs	1.00439	1.26037	1.28467	1.60386	1.30148	1.66226	0.926975	1.2955	1.08739
ENSMUSG00000032590	Apeh	7.36671	7.25006	7.34459	6.27026	6.3873	6.58638	7.35425	7.45176	7.56439
ENSMUSG00000035960	Apex1	6.25398	5.87754	5.88638	5.95695	5.97208	6.03761	7.15697	7.05956	7.28276
ENSMUSG00000025269	Apex2	6.03371	5.98952	6.14174	6.5178	6.20241	6.72623	5.79709	6.03391	5.56824
ENSMUSG00000015750	Aph1a	6.81749	6.56614	6.47193	6.67084	6.75066	6.9018	7.39152	7.46961	7.7215
ENSMUSG00000032375	Aph1b	9.95204	9.96664	9.78245	9.81729	9.73784	9.48682	8.22184	8.24578	8.58499
ENSMUSG00000053040	Aph1c	8.15809	7.86723	8.07394	8.22183	8.26711	8.14605	7.2919	7.61629	7.37279
ENSMUSG00000027193	Api5	10.2328	10.1966	10.1585	9.74054	9.73101	9.47626	10.2707	10.3486	10.8053
ENSMUSG00000010911	Apip	5.39466	5.0073	5.51123	5.59333	5.75537	5.97037	5.41592	5.7466	6.07357
ENSMUSG00000073705	Apitd1	4.12923	3.62478	4.12393	4.04245	4.25158	3.99978	3.68254	3.46126	4.51585
ENSMUSG00000030051	Aplf	5.48286	5.32088	5.43164	5.99041	5.5639	5.72804	5.40115	5.55653	5.3735
ENSMUSG00000037010	Apln	4.44434	4.71241	4.435	4.21127	3.80683	4.33817	4.24348	3.91397	3.70129
ENSMUSG00000044338	Aplnr	4.61229	4.55892	4.88668	3.80981	3.43535	3.52688	3.99344	3.65792	3.46567
ENSMUSG00000006651	Aplp1	4.40388	4.28504	4.28628	3.77325	4.12311	4.1156	4.24183	3.977	3.66215
ENSMUSG00000031996	Aplp2	8.85352	8.84098	8.59106	8.85537	8.98715	9.00663	9.63049	9.65821	9.91839
ENSMUSG00000033096	Apmap	7.74452	7.31253	7.74042	6.94211	6.6838	6.79949	6.71998	6.50317	7.15892
ENSMUSG00000032083	Apoa1	2.08	1.9503	2.46838	1.7326	1.69938	1.96257	1.79599	2.08245	1.73739
ENSMUSG00000028070	Apoa1bp	6.51215	6.10949	6.27226	6.05885	6.60928	6.37115	6.05005	6.28798	6.55886
ENSMUSG00000005681	Apoa2	5.13587	5.11219	5.30173	5.75097	5.80346	6.05412	5.78068	5.48103	5.84688
ENSMUSG00000032080	Apoa4	2.60764	2.20637	2.60295	2.15913	2.45844	1.97861	2.15079	2.55929	2.11297
ENSMUSG00000032079	Apoa5	3.67688	3.63739	3.78682	2.69048	3.47005	3.20452	3.45017	2.85694	3.31557
ENSMUSG00000020609	Apob	5.68192	5.58078	5.70813	5.93138	5.8366	5.87674	5.44013	5.04446	5.44257
ENSMUSG00000040613	Apobec1	10.027	10.5044	9.92616	10.0679	10.2179	10.1752	10.3833	10.3425	10.498
ENSMUSG00000040694	Apobec2	3.81093	4.23732	3.59704	4.13939	3.58632	3.89257	3.85973	4.11825	3.82646
ENSMUSG00000009585	Apobec3	7.5703	7.13552	7.79261	6.86672	7.04416	6.93826	7.30982	7.52757	7.76286
ENSMUSG00000055547	Apobec4	2.57177	2.12619	2.73832	2.42027	2.12063	1.97975	2.24565	2.34959	2.40262
ENSMUSG00000042759	Apobr	12.2319	12.4288	12.1316	11.2391	11.3763	11.2658	12.3928	12.304	12.4825
ENSMUSG00000040564	Apoc1	2.63872	3.14893	2.93197	5.51891	5.26852	5.23019	3.97316	3.23821	3.48819
ENSMUSG00000002992	Apoc2	4.774	4.55299	4.40366	7.33661	7.30586	7.58426	7.32955	6.76672	6.82243
ENSMUSG00000032081	Apoc3	1.88944	1.8399	1.5133	1.53589	1.76789	1.50478	1.70461	1.80736	1.65952
ENSMUSG00000074336	Apoc4	1.6561	2.05881	2.17031	2.19894	1.91467	1.64287	1.74555	1.95007	1.56271
ENSMUSG00000022548	Apod	3.93601	4.02432	4.04889	3.83564	3.90285	3.81522	5.00055	4.99865	4.66126
ENSMUSG00000002985	Apoe	7.23704	7.87091	7.16559	10.9039	10.9799	10.9352	11.7259	11.0853	11.0761
ENSMUSG00000047631	Apof	2.86802	3.05245	3.04567	3.02906	2.95431	2.84996	2.83996	2.2064	3.32017
ENSMUSG00000000049	Apoh	1.92244	1.44953	1.76041	1.89972	1.7321	1.46148	1.46917	1.58686	1.51079
ENSMUSG00000050982	Apol10a	3.23131	2.80961	2.70063	3.61855	2.5172	3.30697	2.92537	2.80252	2.48846
ENSMUSG00000050014	Apol10b	2.79694	3.34154	2.96746	3.26537	3.27064	3.81096	3.03452	2.64997	3.05821
ENSMUSG00000091650	Apol11a	1.29766	1.44758	1.18804	1.60417	1.30938	1.307	1.18619	1.08038	1.10149
ENSMUSG00000091694	Apol11b	3.06931	3.09522	2.88243	3.71588	2.99834	3.41031	2.80102	2.56059	2.27215
ENSMUSG00000033576	Apol6	4.337	4.33426	4.18341	4.18089	4.52407	4.51579	4.00067	3.65325	3.44911
ENSMUSG00000010601	Apol7a	3.1915	3.45108	3.62217	4.04709	3.81287	4.10622	3.10374	3.20904	3.6217
ENSMUSG00000068252	Apol7b	0.552441	0.400121	0.519192	0.498431	0.326446	0.477624	0.615765	0.526129	0.43101
ENSMUSG00000044309	Apol7c	4.66241	5.45426	4.64847	3.23808	3.37988	3.26581	3.57873	3.16706	3.76623
ENSMUSG00000073652	Apol7d	3.73261	3.988	4.00649	7.28631	7.29768	7.42476	5.66852	6.04558	5.27077
ENSMUSG00000071716	Apol7e	1.69956	1.61719	1.64508	1.46911	1.81706	1.43869	1.4482	1.65752	1.69615
ENSMUSG00000056656	Apol8	4.18305	4.03647	4.37041	4.07021	4.03429	3.81222	3.9196	3.90582	4.04731
ENSMUSG00000057346	Apol9a	1.18237	1.07403	1.09636	0.988367	1.235	1.23226	0.877648	0.757543	0.904335
ENSMUSG00000068246	Apol9b	1.85141	2.25923	1.726	1.83539	1.90798	1.35957	1.40513	1.53265	1.56374
ENSMUSG00000090698	Apold1	3.898	3.78221	4.02166	3.85357	3.82757	3.88905	3.88754	3.43176	3.11611
ENSMUSG00000024391	Apom	4.78975	4.74568	4.21013	4.44	4.26349	4.25567	4.36784	4.24222	4.62309
ENSMUSG00000051716	Apon	2.98975	3.22931	3.23106	2.77098	3.2874	3.02302	3.28047	2.69326	2.75096
ENSMUSG00000079508	Apoo	2.96861	2.60606	2.35106	3.2686	3.26707	2.90008	3.31463	3.17815	3.05291
ENSMUSG00000025525	Apool	4.97069	4.93161	4.67069	5.43564	5.15328	5.50866	4.76645	4.84299	5.13842
ENSMUSG00000049233	Apoo-ps	-1.26278	-1.25852	-1.25641	-1.21945	-1.2275	-1.10669	-1.13853	-1.02478	-1.24767
ENSMUSG00000037787	Apopt1	5.92383	5.28839	5.92725	5.52889	5.5527	5.3781	5.19802	5.048	5.60352
ENSMUSG00000022892	App	11.6004	11.8671	11.4602	13.2099	13.1825	13.094	12.927	13.1018	13.3461
ENSMUSG00000018481	Appbp2	10.1142	9.79261	10.2364	9.71312	9.59652	9.71894	9.76843	10.2169	10.2238
ENSMUSG00000040760	Appl1	8.77445	8.5477	8.83157	8.02887	7.99996	7.80778	8.38675	8.90126	8.9216
ENSMUSG00000020263	Appl2	7.91231	7.77924	8.0014	7.18801	7.44905	7.09235	8.38711	8.76725	8.53569
ENSMUSG00000006589	Aprt	8.57868	8.08086	8.3457	8.12993	8.00938	8.20293	8.44609	8.37121	9.04147
ENSMUSG00000028411	Aptx	7.47414	7.27609	7.32548	6.99537	6.72282	6.9916	7.10222	7.62706	7.45335
ENSMUSG00000004655	Aqp1	3.87452	3.96802	3.4471	3.8263	3.86958	3.79418	3.56097	3.70372	3.18091
ENSMUSG00000042797	Aqp11	2.18797	2.35645	2.7662	1.75917	2.271	2.47497	1.86372	2.08502	2.02652
ENSMUSG00000045091	Aqp12	0.822638	1.40581	0.67497	0.607882	0.899493	0.753553	0.89367	0.550926	0.561622
ENSMUSG00000023013	Aqp2	1.98871	1.83654	2.38707	1.98482	1.66867	2.05105	1.54809	1.78226	1.92284
ENSMUSG00000028435	Aqp3	3.4811	3.40886	3.84486	4.12629	3.67582	3.66923	3.92834	3.87398	3.63802
ENSMUSG00000024411	Aqp4	3.98936	3.74094	4.12282	4.26023	4.31488	4.30692	3.51612	3.78386	2.85739
ENSMUSG00000044217	Aqp5	1.83652	1.99576	1.78317	1.44796	2.07406	1.96268	1.95241	1.34732	1.73492
ENSMUSG00000043144	Aqp6	3.98237	4.35092	4.26185	3.8335	3.57042	3.47356	3.93924	3.66913	3.69389
ENSMUSG00000028427	Aqp7	4.53549	4.50512	4.54733	5.2262	5.20009	4.96756	4.77482	4.42488	4.48575
ENSMUSG00000030762	Aqp8	2.64348	2.61642	2.93519	3.09559	2.73683	2.92388	2.49232	2.68002	2.36895
ENSMUSG00000032204	Aqp9	9.43642	9.65786	9.42026	9.36411	9.30056	9.14051	9.61699	9.658	9.77855
ENSMUSG00000040383	Aqr	8.33273	7.91705	8.28066	7.98306	8.13474	8.12915	7.88671	8.09104	8.33159
ENSMUSG00000046532	Ar	4.20345	4.84759	4.58372	5.19291	5.36754	5.44641	4.46341	4.65457	3.95111
ENSMUSG00000001127	Araf	9.2722	9.15758	9.26629	9.00003	9.11305	9.0656	8.45236	8.70292	8.54919
ENSMUSG00000032812	Arap1	12.2541	12.2064	12.3346	13.1081	13.1176	13.1433	12.6447	13.1104	13.0248
ENSMUSG00000037999	Arap2	8.29595	8.27505	8.30799	6.3769	6.17066	6.18388	6.85427	6.85084	6.97715
ENSMUSG00000024451	Arap3	12.5149	12.7151	12.4556	11.0669	10.9692	10.9183	12.5607	12.7182	12.404
ENSMUSG00000022602	Arc	3.51203	3.48545	3.06904	3.27814	3.37556	3.36959	3.43736	3.35525	2.99993
ENSMUSG00000032096	Arcn1	10.1897	10.2983	10.1451	10.3675	10.3862	10.1517	10.6742	10.65	10.9763
ENSMUSG00000029378	Areg	2.21879	1.93285	1.86582	2.53714	1.61252	2.46246	1.96204	2.15914	1.67955
ENSMUSG00000042350	Arel1	10.3821	10.4382	10.2532	10.2988	10.2758	10.2112	10.786	10.8153	10.9139
ENSMUSG00000048076	Arf1	10.9736	10.9325	10.8316	11.1375	11.1191	11.0339	11.5404	11.6494	11.8849
ENSMUSG00000062421	Arf2	6.48232	6.33198	6.31364	6.71063	6.3599	6.17451	7.32577	7.38582	7.78245
ENSMUSG00000051853	Arf3	10.1129	10.2428	10.0912	10.2045	10.3409	10.2387	10.395	10.5696	10.4263
ENSMUSG00000021877	Arf4	8.16204	8.06128	8.26772	8.83168	8.6679	8.53312	8.96172	9.17101	9.43024
ENSMUSG00000020440	Arf5	8.90219	8.71721	8.61082	9.07407	9.13004	9.01177	9.70791	9.65481	10.0354
ENSMUSG00000044147	Arf6	10.9835	11.5358	10.8345	11.7561	11.6273	11.5146	12.532	12.5357	12.7218
ENSMUSG00000027575	Arfgap1	9.30732	9.35073	9.29056	8.92401	9.00112	8.84096	9.22316	9.47434	9.25157
ENSMUSG00000027255	Arfgap2	8.35185	8.11027	8.30364	8.18863	8.00467	7.98596	8.46323	8.64716	8.75208
ENSMUSG00000054277	Arfgap3	6.83518	7.01894	6.76293	8.38706	8.56884	8.33221	8.81152	8.84878	9.23049
ENSMUSG00000067851	Arfgef1	12.1786	12.0401	12.2951	11.2239	11.1777	11.2649	12.0196	12.6684	12.3803
ENSMUSG00000074582	Arfgef2	10.0218	9.47052	10.0324	8.97926	8.93637	8.92438	9.60349	9.84834	9.75879
ENSMUSG00000074513	Arfip1	10.2724	10.8127	10.3827	9.9335	9.99351	9.84838	10.8361	10.9154	11.128
ENSMUSG00000030881	Arfip2	7.3333	7.1842	7.2068	7.26268	7.38249	7.17245	7.71975	7.84694	7.85723
ENSMUSG00000038671	Arfrp1	8.4286	8.53932	8.43542	8.13139	8.12449	8.16293	8.58131	8.87704	8.64802
ENSMUSG00000019987	Arg1	4.64576	3.90608	4.38629	8.01903	8.12767	8.36348	4.56621	4.89479	6.33422
ENSMUSG00000021125	Arg2	11.0486	11.696	10.9475	11.5683	11.5168	11.5184	12.7159	12.8459	13.1226
ENSMUSG00000040459	Arglu1	9.33153	9.2369	9.26859	8.41766	8.65907	8.46168	8.86976	8.90208	8.96026
ENSMUSG00000027247	Arhgap1	9.66002	9.61166	9.5742	9.07962	9.1382	9.02925	9.66638	9.70526	9.7671
ENSMUSG00000037148	Arhgap10	6.67167	6.48833	6.46991	6.46589	6.28549	6.62364	7.72529	7.90218	8.12102
ENSMUSG00000041219	Arhgap11a	9.52958	9.42871	9.53279	7.93158	7.8541	8.01688	9.29922	9.6515	9.39331
ENSMUSG00000041225	Arhgap12	6.21183	6.11464	6.18199	7.60062	7.30569	7.69537	6.91987	6.726	7.80559
ENSMUSG00000049744	Arhgap15	12.0422	11.9983	12.1866	8.32159	8.50753	8.49027	9.36739	9.70689	9.4279
ENSMUSG00000030766	Arhgap17	8.4618	8.37644	8.60412	8.87419	8.91157	8.93578	8.80438	9.60376	9.02224
ENSMUSG00000039031	Arhgap18	8.25816	8.3039	8.21082	8.76874	8.68894	8.61614	8.88645	8.68227	8.85149
ENSMUSG00000025154	Arhgap19	10.141	9.7381	10.1678	7.82796	7.83182	7.68326	8.49955	8.36376	8.57151
ENSMUSG00000053199	Arhgap20	6.11627	5.84484	5.77342	5.9991	5.99672	6.23825	4.94303	5.38211	4.72834
ENSMUSG00000036591	Arhgap21	7.44635	7.13817	7.45551	6.48387	6.71752	6.78506	7.02777	7.36387	7.21726
ENSMUSG00000063506	Arhgap22	4.41014	4.19061	3.84877	4.31016	4.39264	4.32192	5.30808	5.25009	5.6231
ENSMUSG00000049807	Arhgap23	9.0786	8.76241	9.06163	8.59984	8.75765	8.41106	7.73011	7.93677	7.67873
ENSMUSG00000057315	Arhgap24	9.36492	10.1718	9.4968	8.19829	8.28642	8.29849	10.0084	10.4792	10.1463
ENSMUSG00000030047	Arhgap25	12.0616	12.5072	11.9787	11.7451	11.7881	11.7308	12.62	12.6899	12.3976
ENSMUSG00000036452	Arhgap26	9.92274	10.1557	9.96957	9.83687	9.73819	9.94957	10.7759	11.3309	11.1911
ENSMUSG00000034255	Arhgap27	9.56314	9.70477	9.47861	9.62049	9.62835	9.61166	10.5461	10.6673	10.4856
ENSMUSG00000024043	Arhgap28	4.52675	4.60005	4.61313	4.78648	4.75816	4.96148	4.60585	4.61336	4.04008
ENSMUSG00000039831	Arhgap29	5.03633	5.28954	5.11902	5.06043	5.0178	5.7726	4.91601	4.99046	5.01132
ENSMUSG00000048865	Arhgap30	12.9011	13.2391	12.7515	12.3509	12.3803	12.3224	13.2708	13.2305	13.2965
ENSMUSG00000022799	Arhgap31	7.97134	9.68525	7.86774	8.86146	8.89224	8.84654	8.7178	9.27189	8.70069
ENSMUSG00000041444	Arhgap32	6.57573	6.40502	6.65656	6.5459	6.31205	6.37871	6.02378	5.8897	5.49069
ENSMUSG00000036882	Arhgap33	5.468	5.18744	5.25095	4.89339	4.81452	5.14131	4.59071	4.59562	4.2998
ENSMUSG00000036198	Arhgap36	3.26008	3.55921	2.92211	3.80306	3.89342	3.94364	2.99922	2.94384	2.9198
ENSMUSG00000033697	Arhgap39	7.78325	7.57699	7.90414	6.28814	6.17928	6.42338	6.09547	6.23869	6.14539
ENSMUSG00000031389	Arhgap4	12.425	12.6281	12.4093	12.0926	12.0813	12.0267	12.25	12.3399	12.2275
ENSMUSG00000074625	Arhgap40	3.0257	2.99147	3.15961	2.5636	3.04458	3.03921	2.68704	2.71016	2.92954
ENSMUSG00000050730	Arhgap42	4.56128	4.93242	4.8735	5.50751	5.3032	5.45133	4.67116	4.93995	4.30818
ENSMUSG00000033389	Arhgap44	4.37814	4.73991	4.58128	4.30145	4.43297	4.96616	4.10403	4.40055	3.84764
ENSMUSG00000035133	Arhgap5	8.03361	7.95937	8.0795	7.38287	7.34542	7.27652	9.26237	9.33365	9.27646
ENSMUSG00000031355	Arhgap6	5.4427	5.17844	5.66698	5.37969	5.34906	5.15655	5.13329	5.15277	4.53407
ENSMUSG00000078954	Arhgap8	4.11098	3.79933	4.09705	3.9851	4.21052	4.55707	3.85967	3.61102	3.93306
ENSMUSG00000040345	Arhgap9	11.6234	11.7425	11.423	10.4278	10.3766	10.3857	11.8861	11.8216	11.8991
ENSMUSG00000025132	Arhgdia	10.4194	10.4675	10.266	10.2903	10.3523	10.2419	10.9079	11.0507	11.0811
ENSMUSG00000030220	Arhgdib	13.65	13.6762	13.4605	12.5924	12.629	12.5247	13.0214	12.9108	13.2103
ENSMUSG00000073433	Arhgdig	4.961	4.88774	4.53864	4.34611	4.64706	4.63854	4.82428	4.89636	4.64062
ENSMUSG00000040940	Arhgef1	12.2707	12.1918	12.2538	11.3299	11.4457	11.2946	12.2986	12.5316	12.1134
ENSMUSG00000071176	Arhgef10	4.85489	5.06107	5.49288	5.36383	5.15299	5.18124	5.00732	4.90607	4.38916
ENSMUSG00000040964	Arhgef10l	4.7632	4.74527	4.83318	7.24166	7.27556	7.46926	5.95414	5.7932	6.34775
ENSMUSG00000041977	Arhgef11	10.0378	10.1517	10.0569	9.79015	9.79222	9.79861	10.5532	10.792	10.6456
ENSMUSG00000059495	Arhgef12	6.13663	5.87429	6.16591	6.54483	6.49695	6.43307	6.27831	5.99341	6.32299
ENSMUSG00000052921	Arhgef15	4.88158	5.06265	4.79984	5.12679	4.8684	4.9032	4.59426	4.6364	4.31756
ENSMUSG00000029032	Arhgef16	3.79252	4.14425	3.59435	3.93411	3.76059	4.19329	3.79937	3.29428	3.29117
ENSMUSG00000032875	Arhgef17	5.14379	5.58081	5.19588	5.26588	5.38673	5.27328	5.32921	5.04599	4.90357
ENSMUSG00000004568	Arhgef18	10.8592	10.3225	10.8007	6.45098	6.33678	6.41564	7.65861	7.70296	7.46899
ENSMUSG00000028919	Arhgef19	3.88168	4.20214	4.27434	4.17739	3.9366	4.06257	3.98639	3.65737	3.61245
ENSMUSG00000028059	Arhgef2	11.5511	11.7093	11.5211	11.858	11.8223	11.8005	12.1954	12.4618	12.2845
ENSMUSG00000019467	Arhgef25	3.90106	4.22197	4.05729	3.98917	4.09225	4.26226	3.86393	4.08793	3.76382
ENSMUSG00000036885	Arhgef26	5.82709	6.02772	5.98059	5.70797	5.43058	5.5537	5.38288	5.7591	5.3204
ENSMUSG00000021662	Arhgef28	5.10492	5.14674	5.31916	5.04144	4.77111	5.02931	4.632	4.87418	4.4537
ENSMUSG00000021895	Arhgef3	11.6873	12.3663	11.5572	12.8397	12.7699	12.7111	12.7138	12.838	13.1759
ENSMUSG00000054901	Arhgef33	3.82432	3.48757	3.94134	4.31779	3.4658	3.84568	3.48419	3.45411	3.06911
ENSMUSG00000045094	Arhgef37	3.97756	4.309	4.1421	5.08027	4.62296	4.51824	3.94471	3.87405	3.78215
ENSMUSG00000040969	Arhgef38	5.31088	5.18586	5.27189	5.24287	5.22413	5.17724	5.06485	4.93699	5.01824
ENSMUSG00000051517	Arhgef39	6.8538	5.78855	6.88856	5.15541	5.15883	5.31821	6.4034	6.25672	6.67545
ENSMUSG00000037509	Arhgef4	9.20436	9.04223	9.08539	7.16221	7.47839	7.2352	8.10475	8.16815	7.98427
ENSMUSG00000004562	Arhgef40	5.88614	6.10472	6.11437	6.08024	6.19321	6.24651	6.46501	6.61431	6.87609
ENSMUSG00000033542	Arhgef5	5.80983	5.70066	5.82496	5.49973	5.4958	6.2009	5.12254	4.95851	5.07401
ENSMUSG00000031133	Arhgef6	10.4991	10.3205	10.4196	9.07052	9.06638	9.13155	9.43627	9.50881	9.9605
ENSMUSG00000031511	Arhgef7	9.24013	9.15945	9.24796	9.99702	9.85097	9.77635	9.41425	9.8223	9.60396
ENSMUSG00000025656	Arhgef9	4.8395	5.23033	4.75705	5.55259	5.47364	5.4338	4.8762	4.36225	4.36947
ENSMUSG00000007880	Arid1a	11.0775	10.8175	11.2721	9.7448	9.84806	10.0293	10.6536	11.7516	10.627
ENSMUSG00000069729	Arid1b	10.1981	10.2948	10.2884	9.96622	10.0174	10.0567	10.1567	10.5084	10.0462
ENSMUSG00000033237	Arid2	11.0204	11.1876	11.0527	11.0531	10.9451	10.9486	11.559	11.8055	11.6556
ENSMUSG00000019564	Arid3a	12.2795	12.194	12.1552	11.7976	11.7239	11.7241	11.8068	12.0056	12.075
ENSMUSG00000004661	Arid3b	9.39615	9.48103	9.56607	9.55585	9.61302	9.49397	9.60401	10.0839	9.73371
ENSMUSG00000066224	Arid3c	3.11548	2.79203	2.70374	2.77062	2.70307	2.9779	2.45996	2.06326	2.43896
ENSMUSG00000048118	Arid4a	11.7743	12.0731	11.8529	10.4904	10.567	10.4524	11.2847	11.464	11.2946
ENSMUSG00000039219	Arid4b	11.1493	11.452	11.254	11.3649	11.3172	11.1736	11.7815	12.0534	12.0121
ENSMUSG00000037447	Arid5a	9.70757	10.0312	9.61874	10.5934	10.597	10.4932	11.4092	11.6254	11.4709
ENSMUSG00000019947	Arid5b	8.43369	8.87166	8.65548	10.2273	10.1305	10.2631	10.7567	11.3703	11.1761
ENSMUSG00000025234	Arih1	11.7249	11.9492	11.7281	12.05	12.0332	11.9547	12.0463	12.2886	12.3346
ENSMUSG00000064145	Arih2	9.90167	10.1469	9.80255	10.4462	10.4684	10.3231	10.8553	10.8729	11.0113
ENSMUSG00000060904	Arl1	7.30317	7.45888	7.44229	7.58641	7.24891	7.438	7.28221	7.4172	8.26865
ENSMUSG00000025870	Arl10	5.07397	4.39813	4.78611	4.55893	4.89709	5.22861	4.50658	4.25061	5.07931
ENSMUSG00000043157	Arl11	9.00811	9.39431	8.80845	6.83891	6.143	6.85318	9.52823	9.39179	9.25288
ENSMUSG00000052549	Arl13a	3.4294	3.94611	3.74513	3.50239	3.7487	3.88179	3.92459	3.77341	3.63539
ENSMUSG00000022911	Arl13b	6.4364	6.63849	6.42525	6.76863	6.75567	6.83449	7.17882	7.44171	7.64957
ENSMUSG00000027783	Arl14	4.79889	4.6962	4.77526	3.82566	4.10993	3.72122	3.88308	4.32953	3.83677
ENSMUSG00000098207	Arl14	4.79889	4.6962	4.77526	3.82566	4.10993	3.72122	3.88308	4.32953	3.83677
ENSMUSG00000027122	Arl14ep	7.5445	7.16101	7.48695	7.40847	7.29842	6.95725	7.36657	7.27825	7.76154
ENSMUSG00000073568	Arl14epl	3.40298	3.1437	3.42462	3.46777	3.45603	3.01525	2.83626	3.1577	2.73925
ENSMUSG00000042348	Arl15	6.78364	6.76286	6.89671	6.28838	6.27017	6.30211	7.14526	6.96614	7.08373
ENSMUSG00000057594	Arl16	5.91726	5.54808	5.82655	5.70579	6.22722	5.87295	6.01207	6.00038	6.29155
ENSMUSG00000024944	Arl2	5.04527	5.07162	5.18107	5.29995	5.00322	4.95058	4.93313	4.94781	5.33471
ENSMUSG00000031776	Arl2bp	9.45091	9.43482	9.54172	8.61528	8.45378	8.39413	8.96454	9.06628	9.2238
ENSMUSG00000025035	Arl3	6.25802	6.34507	6.18022	7.59521	7.65725	7.86817	7.17006	6.95095	7.40377
ENSMUSG00000047446	Arl4a	5.70922	6.16934	5.93698	5.96241	5.92006	6.05504	6.12299	5.87726	6.10492
ENSMUSG00000049866	Arl4c	10.8789	11.3422	10.6802	10.4221	10.429	10.25	11.3708	11.4299	11.2948
ENSMUSG00000034936	Arl4d	3.45278	3.60373	3.61527	3.41163	3.80307	3.22476	3.75653	3.208	3.97095
ENSMUSG00000036093	Arl5a	8.27423	8.3547	8.25473	8.84026	8.84862	8.72016	9.2756	9.34741	9.76406
ENSMUSG00000017418	Arl5b	9.10176	9.38198	9.12159	9.61596	9.42058	9.47822	10.1472	10.3163	10.6385
ENSMUSG00000038352	Arl5c	5.64239	5.23132	5.32268	7.29764	7.25956	7.06744	6.08679	6.02794	6.52976
ENSMUSG00000022722	Arl6	3.17612	3.43058	3.2393	3.57688	3.7851	3.70984	3.48444	3.67745	3.65524
ENSMUSG00000030654	Arl6ip1	10.4948	10.2545	10.276	10.1809	10.2373	10.1582	10.9958	10.9918	11.4757
ENSMUSG00000029404	Arl6ip4	6.85758	6.57402	6.33373	6.43994	6.73971	6.80394	7.05328	7.07547	7.31704
ENSMUSG00000035199	Arl6ip5	8.17722	8.03825	8.13786	8.54003	8.48005	8.46331	7.99659	8.06478	8.58419
ENSMUSG00000026960	Arl6ip6	8.76281	8.5926	8.59092	8.05207	8.15269	7.98808	8.45981	8.75876	8.82062
ENSMUSG00000026426	Arl8a	9.05132	9.18238	9.04963	8.60865	8.62019	8.61289	9.54042	9.81641	9.52219
ENSMUSG00000030105	Arl8b	9.11775	9.58186	9.18602	9.62379	9.68818	9.52582	10.3576	10.4723	10.7434
ENSMUSG00000063820	Arl9	2.58271	2.51893	2.75053	2.30875	1.99046	2.57515	2.06742	2.27399	2.01418
ENSMUSG00000027599	Armc1	6.74877	6.42016	6.68086	6.86683	6.84205	6.88705	6.64068	6.66143	7.32942
ENSMUSG00000038525	Armc10	5.91133	5.96378	6.24879	5.60968	5.72467	5.98129	5.89286	6.08417	6.31278
ENSMUSG00000024223	Armc12	4.25736	4.49576	4.14221	3.86487	4.04869	3.59409	3.60349	3.57473	3.78224
ENSMUSG00000071324	Armc2	4.41845	4.7889	4.72201	5.11482	4.90283	4.93505	4.51112	4.43674	3.98906
ENSMUSG00000037683	Armc3	4.75826	4.91198	5.0166	4.33434	3.77421	4.44761	3.97474	3.84735	3.93903
ENSMUSG00000061802	Armc4	3.53456	4.1804	4.09385	4.31889	4.26422	4.36344	3.75034	3.89175	3.69116
ENSMUSG00000042178	Armc5	6.4063	6.13945	6.27457	5.99004	5.83961	5.77167	6.4812	6.57642	6.78123
ENSMUSG00000002343	Armc6	5.30972	5.77622	5.37821	5.41508	5.91949	5.77363	6.65812	6.78278	6.84203
ENSMUSG00000057219	Armc7	9.96299	10.1707	9.87164	9.20782	9.18888	9.00084	10.3814	10.3897	10.2329
ENSMUSG00000032468	Armc8	9.22277	9.03894	9.16084	8.32688	8.35032	8.36021	8.33427	8.50854	8.26486
ENSMUSG00000062590	Armc9	6.05032	6.03794	6.30586	6.36176	6.1648	6.25917	5.90746	6.30995	5.86392
ENSMUSG00000033460	Armcx1	3.64974	3.43529	3.49606	4.23143	4.38672	4.37864	3.92009	3.23713	3.60603
ENSMUSG00000033436	Armcx2	4.61888	4.96496	4.30091	5.78746	5.53107	5.9001	4.77093	4.71024	5.08792
ENSMUSG00000049047	Armcx3	5.24213	6.04634	5.69677	7.41942	7.20117	7.07594	7.02192	6.9948	7.40758
ENSMUSG00000049804	Armcx4	4.6339	5.09836	5.26203	6.19668	6.08823	6.03589	5.0965	5.3255	4.97854
ENSMUSG00000072969	Armcx5	7.48643	7.68889	7.31926	7.67218	7.60532	7.41573	7.35675	7.62389	7.80128
ENSMUSG00000050394	Armcx6	2.87336	3.42878	3.36064	4.39053	4.41825	4.3162	3.21138	3.45403	3.53677
ENSMUSG00000015522	Arnt	9.76132	9.95974	9.79673	10.1013	10.0766	9.94924	10.4535	10.9263	10.6253
ENSMUSG00000015709	Arnt2	4.96317	4.91984	4.92432	4.2488	4.94358	4.80741	4.43607	4.31045	4.26879
ENSMUSG00000055116	Arntl	5.27174	5.04697	5.49879	5.28178	4.92815	5.60721	5.27412	5.22233	5.48562
ENSMUSG00000040187	Arntl2	4.81982	5.33365	4.78261	4.67346	4.65833	4.59763	4.42601	4.99061	4.39643
ENSMUSG00000029621	Arpc1a	9.3399	9.21987	9.10155	9.21887	9.16098	9.04027	9.94005	9.86802	10.0672
ENSMUSG00000029622	Arpc1b	13.3633	13.5764	13.1227	12.4839	12.4898	12.4809	14.1239	14.0517	14.281
ENSMUSG00000006304	Arpc2	12.9488	13.2868	12.8466	13.053	13.0768	12.9592	13.1493	13.2375	13.4705
ENSMUSG00000029465	Arpc3	11.4867	11.5973	11.3059	11.8709	11.9493	11.8107	12.0881	12.0399	12.434
ENSMUSG00000079426	Arpc4	11.0882	11.1805	10.8097	11.0537	11.039	10.951	11.6396	11.6464	11.8792
ENSMUSG00000008475	Arpc5	12.7146	12.8271	12.6184	12.3019	12.238	12.1608	12.3735	12.4256	12.838
ENSMUSG00000026755	Arpc5l	8.19486	8.40442	8.16764	8.31649	8.24898	8.15895	8.80424	8.90495	8.92063
ENSMUSG00000007656	Arpp19	8.6274	8.53203	8.45087	8.01199	8.08854	8.16015	8.72475	8.92131	9.25642
ENSMUSG00000032503	Arpp21	6.64622	6.5757	6.43878	6.69129	6.79705	6.82757	5.81805	5.83072	5.50596
ENSMUSG00000060890	Arr3	4.17368	4.18235	3.81046	3.98233	4.37434	4.68554	3.80429	3.78509	3.31549
ENSMUSG00000018909	Arrb1	12.2852	12.1874	12.1788	11.0066	10.953	11.0722	10.9153	10.9955	11.038
ENSMUSG00000060216	Arrb2	13.0099	13.143	12.8688	12.6081	12.6442	12.5913	13.371	13.4062	13.4364
ENSMUSG00000026972	Arrdc1	9.59739	9.63991	9.34135	8.99198	8.89918	8.91037	10.3873	10.4037	10.6762
ENSMUSG00000002910	Arrdc2	7.07091	7.65985	6.87651	7.07415	7.15047	6.97004	8.06744	8.19723	8.12458
ENSMUSG00000074794	Arrdc3	12.4811	13.3497	12.391	11.3764	11.4175	11.2018	13.1461	13.0617	13.0313
ENSMUSG00000042659	Arrdc4	8.8513	9.69839	8.52815	10.794	10.7642	10.7612	11.4596	11.483	11.5694
ENSMUSG00000073380	Arrdc5	2.15564	1.94115	2.06117	1.81679	2.36891	2.15971	1.96934	1.98611	2.02908
ENSMUSG00000022620	Arsa	7.46945	7.41614	7.05315	6.58589	6.83207	6.93772	7.95473	7.74584	7.94375
ENSMUSG00000042082	Arsb	8.01644	7.37597	8.15285	6.73105	6.3484	6.7492	7.50948	8.02133	7.53516
ENSMUSG00000020604	Arsg	10.1919	10.6571	10.0715	10.7087	10.7877	10.6696	10.6464	10.8096	10.7793
ENSMUSG00000036412	Arsi	2.92949	2.87247	3.05019	2.93188	2.86194	3.21288	2.91664	2.79704	2.68803
ENSMUSG00000046561	Arsj	3.30463	3.39676	3.21864	3.55985	3.4699	3.46369	3.14679	3.36781	3.17321
ENSMUSG00000021592	Arsk	6.15673	5.85095	6.10433	5.66929	5.73965	5.88957	5.49573	5.35686	5.73089
ENSMUSG00000030996	Art1	2.29965	2.53263	2.57871	2.37671	2.42705	2.19931	2.01749	2.13222	1.84113
ENSMUSG00000092517	Art2a-ps	3.73027	3.85645	3.50805	4.9196	5.17708	5.48956	3.43012	3.30728	3.20961
ENSMUSG00000030651	Art2b	2.71449	2.67812	2.80666	3.43926	3.74211	3.48658	2.53761	2.82793	2.61613
ENSMUSG00000034842	Art3	4.45028	4.82793	4.58613	5.23177	4.64952	5.1266	5.03818	4.76111	5.17012
ENSMUSG00000030217	Art4	3.04252	3.00853	3.17753	2.94283	3.0632	2.86758	3.17243	2.64083	2.49983
ENSMUSG00000070424	Art5	3.14615	3.0192	3.07079	2.72768	2.78067	3.06895	2.71824	3.26267	2.79957
ENSMUSG00000028539	Artn	2.71769	2.71194	2.61504	2.7539	2.68738	2.87322	2.75433	2.37804	2.32501
ENSMUSG00000031982	Arv1	3.66976	3.54542	3.89405	3.46367	3.71043	3.77527	3.84481	3.45874	3.5373
ENSMUSG00000000325	Arvcf	4.94859	4.70968	4.78961	4.52917	4.73152	4.62453	4.65737	4.52316	4.50711
ENSMUSG00000098615	ARVCF	0	0	0	0	0	0	0	0	0
ENSMUSG00000035277	Arx	1.91066	1.90474	1.93555	2.05696	2.12515	2.22813	1.93267	2.03958	1.88993
ENSMUSG00000048355	Arxes1	0.777763	0.932911	0.814148	1.37291	1.77048	1.04282	1.37493	1.19264	0.977571
ENSMUSG00000048040	Arxes2	0.727835	1.37651	0.889062	1.03283	0.85694	0.998853	0.645388	0.779663	0.922296
ENSMUSG00000003559	As3mt	3.75485	3.52968	4.17756	4.15188	4.61352	4.29298	4.47424	4.02448	5.02782
ENSMUSG00000031591	Asah1	10.4818	10.1304	10.3985	10.7053	10.6236	10.5873	10.4626	10.3969	10.884
ENSMUSG00000024887	Asah2	5.39266	5.18343	5.06991	5.50135	5.48951	5.17444	4.97848	4.9942	4.56056
ENSMUSG00000022377	Asap1	10.633	10.4013	10.7931	10.0429	10.0999	10.0661	9.64972	10.6565	9.83806
ENSMUSG00000052632	Asap2	6.44962	6.58354	6.48845	6.50925	6.65758	6.362	6.75902	6.89277	6.57957
ENSMUSG00000036995	Asap3	4.58198	4.78373	4.55307	5.66176	5.63174	5.6999	4.58433	5.05079	4.81239
ENSMUSG00000026311	Asb1	7.03127	6.8807	6.92282	6.04932	6.05582	6.06991	6.6481	6.61661	6.76021
ENSMUSG00000038204	Asb10	3.10023	2.87173	3.18056	3.46	2.93689	2.82613	3.11548	2.8659	3.00771
ENSMUSG00000031382	Asb11	2.82943	3.2228	3.33991	3.78496	3.10842	2.99714	3.55272	3.77248	3.44363
ENSMUSG00000031204	Asb12	1.01503	0.86457	1.17993	0.982546	1.09753	0.957651	1.17759	1.09752	0.901733
ENSMUSG00000033781	Asb13	4.25657	4.63912	4.441	4.89224	5.12305	4.66302	4.67939	4.62131	4.40987
ENSMUSG00000021898	Asb14	4.05282	4.26537	4.50763	4.18281	4.2022	4.31035	3.8546	4.0404	3.80733
ENSMUSG00000029685	Asb15	4.4415	4.57015	4.83884	5.10409	5.2638	5.15281	4.37969	4.24197	4.56649
ENSMUSG00000034768	Asb16	2.72303	2.55993	2.75391	2.82465	2.65088	2.94204	2.81911	2.91119	2.5891
ENSMUSG00000038997	Asb17	2.36555	2.4697	2.58329	2.32773	2.7803	2.5955	2.18055	1.99162	2.02959
ENSMUSG00000067081	Asb18	1.66953	1.90441	2.08445	1.50839	2.0795	1.618	1.36597	1.49396	1.26385
ENSMUSG00000021200	Asb2	4.13297	3.85945	4.06768	4.05236	4.43671	4.08082	4.44636	3.79604	4.61879
ENSMUSG00000020305	Asb3	8.3571	8.69246	8.51348	7.67606	7.61341	7.45597	8.45265	8.65356	8.70691
ENSMUSG00000042607	Asb4	3.42368	4.09613	3.82698	3.72833	3.70545	3.76801	3.21687	2.83278	2.89525
ENSMUSG00000031519	Asb5	2.37321	2.17879	2.38093	2.26371	2.63414	2.79835	1.91437	2.13854	1.84231
ENSMUSG00000039483	Asb6	7.89309	7.87502	7.7135	7.63498	7.51661	7.27431	8.42784	8.18119	8.43152
ENSMUSG00000030509	Asb7	11.5079	11.7349	11.5222	10.155	10.1618	10.081	10.7154	10.9647	10.9727
ENSMUSG00000048175	Asb8	7.41117	7.47295	7.30957	7.35308	7.44651	7.37485	7.47267	7.5567	7.83444
ENSMUSG00000031384	Asb9	1.66055	1.89324	1.92774	1.58796	1.82208	1.81897	1.6612	1.86033	1.60096
ENSMUSG00000044475	Ascc1	5.54811	5.56314	5.65351	5.20242	5.52076	5.57411	5.70049	5.65507	6.16333
ENSMUSG00000020412	Ascc2	7.9267	7.63191	7.85065	6.80562	6.66122	6.95175	8.28937	8.57816	8.19353
ENSMUSG00000038774	Ascc3	9.67015	9.69664	9.68777	9.96506	9.97904	9.9901	10.6006	10.8135	11.0125
ENSMUSG00000020052	Ascl1	3.72168	3.65852	3.50163	4.03656	3.99458	4.26181	3.36946	3.33156	3.25473
ENSMUSG00000009248	Ascl2	5.41488	5.06247	5.44991	3.7453	3.22522	3.72705	3.10088	3.30794	3.6266
ENSMUSG00000035951	Ascl3	2.78612	2.22426	2.50041	2.03107	2.8495	2.48193	2.0683	2.18493	2.01467
ENSMUSG00000085111	Ascl4	3.66362	3.54953	3.5023	3.50182	4.09592	3.40884	3.55226	3.34382	3.35043
ENSMUSG00000097918	Ascl5	-1.55985	-1.55091	-1.54635	-1.51169	-1.4054	-1.40592	-1.43293	-1.54434	-1.53816
ENSMUSG00000019857	Asf1a	7.24203	7.19325	6.99018	6.86092	6.98548	6.78492	7.56574	8.08101	7.9048
ENSMUSG00000005470	Asf1b	6.71867	5.77703	6.48102	5.06612	5.1236	5.02075	6.17572	6.23976	6.45873
ENSMUSG00000020884	Asgr1	3.5484	3.53674	3.22719	3.23024	3.24328	3.4041	3.02123	2.89189	3.03847
ENSMUSG00000040963	Asgr2	3.48894	2.91854	3.47134	3.1473	3.07178	3.76717	3.17579	3.26901	3.13413
ENSMUSG00000028053	Ash1l	11.6808	11.9152	11.7666	11.193	11.1347	11.1024	12.2063	12.7144	12.4033
ENSMUSG00000031575	Ash2l	6.81705	6.17701	6.8034	6.79661	6.76377	6.65854	6.87527	6.78024	7.14788
ENSMUSG00000023017	Asic1	5.59001	5.12695	5.47792	4.65394	4.4107	3.96552	4.53463	4.97085	4.96373
ENSMUSG00000020704	Asic2	3.61086	3.63495	3.74673	3.88694	3.64341	4.07954	2.99816	3.18433	2.90712
ENSMUSG00000038276	Asic3	4.90494	5.16918	4.64999	3.76326	4.81612	4.51873	4.507	4.61846	3.74427
ENSMUSG00000033007	Asic4	3.55319	3.32874	3.26722	3.96694	2.98883	3.52666	3.05828	2.92754	3.231
ENSMUSG00000028008	Asic5	2.7087	2.70256	2.2472	3.03733	2.67657	3.03437	2.43431	2.62323	2.19532
ENSMUSG00000025533	Asl	7.57791	7.27801	7.56528	6.78836	6.94384	6.93252	7.77219	7.61587	8.04009
ENSMUSG00000093806	Asmt	0.796924	1.02336	0.95531	0.844522	0.668035	0.959148	0.8529	0.862166	0.886019
ENSMUSG00000052456	Asna1	7.70001	7.77332	7.13552	7.83331	7.95369	7.61773	8.51209	8.41555	8.8485
ENSMUSG00000029752	Asns	8.63734	9.02204	8.37317	9.274	9.35277	9.25772	10.533	10.7085	11.2626
ENSMUSG00000026095	Asnsd1	9.52249	9.31803	9.49012	10.1671	10.0041	9.87579	10.1186	10.1158	10.5698
ENSMUSG00000020774	Aspa	4.43134	4.62404	4.53589	4.96809	5.36799	4.48845	4.3362	4.14923	4.39152
ENSMUSG00000038704	Aspdh	2.62008	2.49025	2.66759	2.35255	2.5219	2.29616	2.29518	2.02026	2.36507
ENSMUSG00000037686	Aspg	3.65668	3.32317	3.6351	3.4545	3.18965	3.18412	3.31763	3.2867	2.70384
ENSMUSG00000028207	Asph	7.67096	7.86673	7.70308	8.2561	8.28328	8.23764	8.05784	8.15743	8.98645
ENSMUSG00000046378	Asphd1	4.67624	4.87511	4.65719	4.4964	4.60988	4.75189	4.80839	5.28048	4.61521
ENSMUSG00000029348	Asphd2	2.05956	1.81798	2.11245	2.18426	1.74959	1.88541	2.25817	2.12856	1.89585
ENSMUSG00000033952	Aspm	9.15979	8.10968	9.01494	6.44013	6.47932	5.95037	8.46618	8.66322	8.86819
ENSMUSG00000021388	Aspn	3.70177	3.58852	4.15758	3.45215	3.62508	3.83502	3.28552	3.6247	3.46105
ENSMUSG00000033508	Asprv1	12.1357	12.1338	11.8819	13.9333	13.9595	13.8678	13.7083	13.7475	14.3196
ENSMUSG00000025142	Aspscr1	9.16594	9.19757	9.08171	8.63312	8.80527	8.69681	9.58598	9.56312	9.57525
ENSMUSG00000024654	Asrgl1	5.52724	5.18265	5.43878	6.23815	5.99775	5.96412	5.43045	5.36027	5.95759
ENSMUSG00000076441	Ass1	3.43344	4.29519	4.0112	4.37266	3.9745	4.58908	4.8757	5.15967	5.1579
ENSMUSG00000032567	Aste1	7.07949	7.60699	7.31311	6.65611	6.81909	6.85246	7.02652	7.47131	7.27983
ENSMUSG00000050468	Astl	3.91741	4.0487	4.11879	4.35779	3.70571	4.12179	4.0709	3.6547	3.73969
ENSMUSG00000026587	Astn1	5.10961	5.0191	4.77082	5.00086	5.41527	5.06906	4.4019	4.56317	3.9078
ENSMUSG00000028373	Astn2	4.28308	4.74577	4.144	4.58918	4.62743	4.80329	4.43181	4.88897	4.12015
ENSMUSG00000095420	Astx1a	0	0	0	0	0	0	0	0	0
ENSMUSG00000095283	Astx1b	0	0	0	0	0	0	0	0	0
ENSMUSG00000095008	Astx1c	0	0	0	0	0	0	0	0	0
ENSMUSG00000094288	Astx2	0.776416	0.391443	0.61602	0.326133	0.472684	0.611705	0.279017	0.521369	0.290376
ENSMUSG00000095563	Astx3	-2.1595	-2.15568	-2.15412	-2.14221	-2.1448	-2.14498	-2.15426	-2.11431	-2.1513
ENSMUSG00000096318	Astx4a	0	0	0	0	0	0	0	0	0
ENSMUSG00000094675	Astx4b	0	0	0	0	0	0	0	0	0
ENSMUSG00000094540	Astx4c	0	0	0	0	0	0	0	0	0
ENSMUSG00000096897	Astx4d	0	0	0	0	0	0	0	0	0
ENSMUSG00000095521	Astx5	-1.25579	-1.11968	-1.24747	-1.06513	-1.0744	-1.07504	-1.24777	-1.245	-1.23741
ENSMUSG00000095005	Astx6	-0.67928	-0.552187	-0.774884	-0.588892	-0.599027	-0.752603	-0.775147	-0.647072	-0.769731
ENSMUSG00000040250	Asun	9.08206	9.18399	8.97885	8.15987	8.08013	7.97773	8.88913	8.92442	9.10353
ENSMUSG00000042548	Asxl1	12.1857	12.2414	12.1386	10.4025	10.4138	10.4879	11.3541	11.6138	11.2771
ENSMUSG00000037486	Asxl2	9.90365	9.75667	9.92137	9.17834	9.08513	9.04576	9.75202	10.0235	9.86657
ENSMUSG00000045215	Asxl3	5.2872	5.48619	5.5564	5.81098	5.77322	5.90931	4.84259	5.10332	4.46908
ENSMUSG00000010796	Asz1	3.4923	3.16849	3.34941	3.57014	3.76389	3.81935	3.28273	2.94803	2.82799
ENSMUSG00000013662	Atad1	8.80657	8.7797	8.70181	9.093	9.04692	8.81183	9.25428	9.38191	9.89865
ENSMUSG00000022360	Atad2	9.39759	9.12372	9.38099	8.9521	8.99293	9.03125	10.8944	10.9989	11.1886
ENSMUSG00000052812	Atad2b	9.9267	10.0702	10.1048	9.59123	9.40346	9.55517	9.97855	10.5696	10.1161
ENSMUSG00000029036	Atad3a	5.15132	4.64993	5.08821	5.89293	5.34281	5.43733	5.68331	5.65796	6.22999
ENSMUSG00000017550	Atad5	7.36521	6.80703	7.54065	7.68954	7.74169	7.50197	6.89772	7.0565	7.35232
ENSMUSG00000024426	Atat1	6.70263	7.0092	6.91078	7.40026	7.52443	7.16716	6.96256	7.41823	7.18571
ENSMUSG00000034958	Atcay	3.81191	3.06077	3.57589	3.52365	3.51068	3.42718	2.96091	2.72528	2.88059
ENSMUSG00000030850	Ate1	9.70712	9.76524	9.74756	9.46959	9.58715	9.42157	9.73514	9.83249	9.9313
ENSMUSG00000023027	Atf1	9.58533	10.0108	9.71345	9.39991	9.29872	9.45547	10.6454	10.8892	10.6334
ENSMUSG00000027104	Atf2	9.85922	10.0452	9.85221	10.0704	10.0564	9.92495	10.5708	10.9089	10.9161
ENSMUSG00000026628	Atf3	6.84289	9.09066	6.78063	9.06201	8.84213	8.88005	10.6296	10.3623	10.4519
ENSMUSG00000042406	Atf4	10.206	10.2085	10.0211	9.41844	9.47623	9.40511	11.0929	10.9849	11.3617
ENSMUSG00000038539	Atf5	6.02782	6.10542	6.12939	5.69416	6.0227	5.63844	7.21168	7.25196	7.40723
ENSMUSG00000026663	Atf6	9.007	8.97581	9.02994	10.6638	10.5534	10.5859	10.3605	10.5628	10.5968
ENSMUSG00000015461	Atf6b	8.97307	8.9829	8.7874	8.88371	8.83187	8.71631	9.80669	9.94432	10.0189
ENSMUSG00000099083	ATF7	9.15997	8.80519	9.24023	7.83368	7.99305	8.10352	8.32292	9.03258	8.34642
ENSMUSG00000052414	Atf7	7.07353	7.12705	7.14475	6.02903	5.96005	6.21757	6.47053	6.86152	6.58274
ENSMUSG00000071584	Atf7	5.00851	4.21322	5.04168	4.13111	4.0239	4.52697	4.61712	4.95327	4.37716
ENSMUSG00000030213	Atf7ip	11.2751	11.728	11.2988	11.8134	11.8026	11.8151	12.4222	12.8871	12.4584
ENSMUSG00000053935	Atf7ip	8.84461	9.11603	8.96989	9.16306	9.08964	9.23729	9.61818	10.3792	9.90551
ENSMUSG00000039200	Atf7ip2	3.68534	3.71206	3.77763	3.90376	3.56998	4.61711	3.23081	3.46921	3.2567
ENSMUSG00000021619	Atg10	3.98147	4.07463	4.22701	4.11482	4.5254	3.93061	4.0515	4.08875	4.27327
ENSMUSG00000032905	Atg12	8.99999	9.35803	8.87943	9.43079	9.23891	9.13069	9.90287	10.0331	10.3905
ENSMUSG00000027244	Atg13	8.22106	8.03772	8.14123	7.59056	7.66341	7.60698	8.35848	8.9143	8.5321
ENSMUSG00000037526	Atg14	6.0574	5.64649	6.18511	5.79669	6.03208	6.11355	5.83932	6.22696	6.53387
ENSMUSG00000026289	Atg16l1	9.73256	9.91451	9.65906	9.57462	9.64497	9.56029	10.4136	10.6453	10.697
ENSMUSG00000047767	Atg16l2	9.6183	9.33154	9.51516	9.94982	10.0488	9.97681	9.8686	9.94631	10.2472
ENSMUSG00000024773	Atg2a	10.58	10.5232	10.4748	10.0239	9.95391	10.025	10.9122	11.1832	10.7305
ENSMUSG00000041341	Atg2b	9.41448	9.3791	9.31594	9.16559	9.04852	9.01216	9.86763	10.0774	9.99402
ENSMUSG00000022663	Atg3	11.8933	12.589	11.8852	11.4052	11.4134	11.351	12.4563	12.6681	12.5388
ENSMUSG00000079418	Atg4a	5.99552	6.01606	6.03637	6.19434	6.37755	6.18867	5.64084	5.93273	6.49491
ENSMUSG00000087119	Atg4a-ps	-0.334313	-0.201321	-0.19149	-0.113491	0.148885	-0.294947	-0.192411	-0.187098	-0.312511
ENSMUSG00000026280	Atg4b	8.75587	8.86608	8.77201	8.8653	8.73544	8.70231	9.06486	9.33867	9.27383
ENSMUSG00000028550	Atg4c	7.57337	7.56846	7.57852	6.53503	6.74981	6.59109	6.01882	6.58313	6.59577
ENSMUSG00000002820	Atg4d	9.06974	8.98241	8.91482	8.68389	8.84153	8.7575	9.19012	9.15389	9.23945
ENSMUSG00000038160	Atg5	8.72218	8.93934	8.67694	8.51365	8.50453	8.40078	8.76891	8.89583	9.38318
ENSMUSG00000030314	Atg7	11.7383	11.8997	11.7361	10.8939	10.9379	10.8991	11.3244	11.5518	11.3389
ENSMUSG00000033124	Atg9a	10.201	9.81015	10.0354	10.4753	10.5054	10.4735	10.1333	10.3913	10.3943
ENSMUSG00000038295	Atg9b	4.3396	4.23926	4.03011	4.08273	4.28918	4.1038	3.77564	3.81046	3.9545
ENSMUSG00000062031	Athl1	8.42165	8.46325	8.35306	9.9082	9.94216	9.91767	9.42909	9.62755	9.89435
ENSMUSG00000026192	Atic	5.76497	5.42678	6.06335	5.63065	5.94736	6.24173	6.79201	6.64448	7.84996
ENSMUSG00000021066	Atl1	4.75935	4.9867	4.85043	4.4027	4.97724	4.52974	4.81255	5.29535	5.19516
ENSMUSG00000059811	Atl2	7.62327	7.65057	7.64192	7.66888	7.62271	7.52811	8.35038	8.54967	8.62538
ENSMUSG00000024759	Atl3	8.66459	8.17593	8.71782	8.40834	8.53467	8.64561	8.4133	8.67825	8.91114
ENSMUSG00000034218	Atm	6.8094	6.80291	6.8663	6.99003	6.94248	6.9718	7.31762	7.25628	7.75728
ENSMUSG00000047388	Atmin	7.24241	6.81187	7.04111	7.50803	7.79015	7.48794	7.29204	7.13392	7.32508
ENSMUSG00000004263	Atn1	9.03593	8.79143	8.88689	8.52225	8.5091	8.6345	9.1034	9.84005	9.28033
ENSMUSG00000073043	Atoh1	1.73771	2.09845	2.13499	2.80862	2.46084	2.45617	2.03807	1.84208	1.87922
ENSMUSG00000036816	Atoh7	-0.363583	-0.43872	-0.554329	-0.523542	-0.37398	-0.232328	-0.554639	-0.55285	-0.413293
ENSMUSG00000037621	Atoh8	2.03127	1.90311	2.09321	1.82972	1.7903	1.78757	1.84523	1.95003	1.69241
ENSMUSG00000018585	Atox1	7.73138	7.6622	7.30327	8.54291	8.77318	8.60012	9.25081	9.25771	9.90358
ENSMUSG00000025324	Atp10a	5.94156	5.23438	6.07715	5.05815	5.01934	4.64813	5.44959	5.73275	6.00963
ENSMUSG00000055415	Atp10b	5.38075	5.28852	5.28488	5.6461	6.03714	5.89499	4.89319	5.00073	4.29351
ENSMUSG00000046808	Atp10d	7.70955	7.73759	7.90866	8.2864	8.30336	7.99047	6.99331	7.09035	7.1754
ENSMUSG00000031441	Atp11a	11.8594	11.7706	11.8199	10.6838	10.6748	10.6783	10.5173	10.871	10.6079
ENSMUSG00000037400	Atp11b	12.6158	12.8211	12.6653	13.0987	13.0454	13.0178	12.3147	12.6876	12.5982
ENSMUSG00000062949	Atp11c	9.96476	9.91841	10.0254	8.73624	8.68594	8.44984	9.31322	9.55938	9.72377
ENSMUSG00000022229	Atp12a	4.31811	4.12248	4.51785	4.19329	4.38328	4.32077	4.22779	3.6663	3.68554
ENSMUSG00000031862	Atp13a1	8.60995	8.37585	8.41401	7.89137	8.05631	7.76952	8.86088	8.82444	8.92149
ENSMUSG00000036622	Atp13a2	8.21129	7.88937	8.14325	8.26392	8.42328	8.43178	8.80587	8.80563	9.07164
ENSMUSG00000022533	Atp13a3	10.3778	10.3467	10.519	10.5248	10.4138	10.4898	10.9842	11.3084	11.1677
ENSMUSG00000038094	Atp13a4	4.74263	4.83828	4.7396	5.39583	5.29215	5.28266	4.4432	4.00072	4.5487
ENSMUSG00000048939	Atp13a5	4.55362	4.23539	3.91579	4.38239	4.53303	4.52473	4.05415	3.78165	3.37209
ENSMUSG00000033161	Atp1a1	8.27372	7.86875	7.93915	9.50217	9.63087	9.65333	9.48261	9.55559	10.0401
ENSMUSG00000007097	Atp1a2	5.1421	5.07644	5.06163	5.43226	4.99558	5.31825	4.5163	4.63487	4.13428
ENSMUSG00000040907	Atp1a3	11.5161	11.4257	11.5809	10.174	10.2315	10.0471	10.0412	10.842	9.25572
ENSMUSG00000007107	Atp1a4	4.55196	4.66502	4.11051	4.75619	4.43505	4.06106	4.10389	3.88969	3.98138
ENSMUSG00000026576	Atp1b1	5.61131	4.53327	5.6081	4.10791	3.74354	3.91127	4.3468	4.34604	4.31351
ENSMUSG00000041329	Atp1b2	4.55551	4.66322	4.80269	5.10301	4.84906	4.70424	4.53759	4.34377	3.9794
ENSMUSG00000032412	Atp1b3	10.0299	10.2736	10.0194	12.1975	12.0513	12.0221	11.6748	11.7669	12.3033
ENSMUSG00000016327	Atp1b4	4.97029	4.96857	4.79329	5.78506	5.4107	5.65791	5.8345	6.92056	5.99319
ENSMUSG00000030730	Atp2a1	5.71666	5.6243	5.60178	5.41971	5.68075	5.64146	5.75971	5.89234	5.5001
ENSMUSG00000029467	Atp2a2	8.5823	8.44255	8.56749	8.21954	8.35546	8.40258	8.98037	9.17222	9.3052
ENSMUSG00000020788	Atp2a3	11.3604	10.8718	11.2405	10.4715	10.5421	10.3424	9.30338	9.2815	9.04255
ENSMUSG00000019943	Atp2b1	11.6536	11.8918	11.7387	11.4951	11.4271	11.4544	11.8957	12.2182	12.2848
ENSMUSG00000030302	Atp2b2	5.57406	5.45353	5.61917	5.72931	5.52493	5.60511	5.32064	4.8276	4.82949
ENSMUSG00000031376	Atp2b3	3.71464	4.19471	3.45371	4.25427	4.30885	4.30091	3.6908	3.54583	3.33676
ENSMUSG00000026463	Atp2b4	6.64092	6.17933	6.66407	6.66796	6.73591	6.69486	6.18423	6.06964	5.89127
ENSMUSG00000032570	Atp2c1	12.0972	12.2502	12.0722	11.5503	11.4578	11.4058	11.547	11.7133	11.8513
ENSMUSG00000034112	Atp2c2	3.96186	3.83336	3.6628	3.95646	3.63827	3.63175	3.29763	3.5806	3.40342
ENSMUSG00000005553	Atp4a	4.54535	4.71176	4.42449	4.65068	4.12893	4.30782	3.95253	3.93704	3.72479
ENSMUSG00000031449	Atp4b	2.62812	2.69459	2.48813	2.42442	2.25015	2.36254	2.06193	1.97154	2.12016
ENSMUSG00000025428	Atp5a1	10.2471	10.2264	10.1202	9.97475	10.0459	9.96827	10.7312	10.6675	11.1207
ENSMUSG00000025393	Atp5b	10.9247	10.8928	10.7064	10.6476	10.7594	10.6453	11.4361	11.318	11.8612
ENSMUSG00000025781	Atp5c1	9.70671	9.79132	9.56436	9.48583	9.41095	9.24133	9.66493	9.57357	10.0643
ENSMUSG00000003072	Atp5d	7.92603	7.77256	7.91364	8.52496	8.73514	8.5132	8.72583	8.64055	8.71294
ENSMUSG00000016252	Atp5e	7.74423	7.65689	7.32412	7.51979	7.68232	7.31876	8.72079	8.72128	9.15542
ENSMUSG00000000563	Atp5f1	10.3103	10.3616	10.1905	10.1278	10.1728	9.95366	10.4966	10.5318	10.9463
ENSMUSG00000006057	Atp5g1	5.24862	5.2503	5.10582	5.38851	5.53099	5.52107	5.85091	5.69303	6.20424
ENSMUSG00000062683	Atp5g2	4.41266	4.24979	4.68127	4.53447	4.6305	4.40894	4.61013	4.27134	4.91504
ENSMUSG00000018770	Atp5g3	7.15247	6.48437	6.64825	6.90523	6.83484	6.5837	7.10944	6.85245	7.77896
ENSMUSG00000034566	Atp5h	8.75952	8.57788	8.60744	8.64654	8.71432	8.53157	8.89347	8.80462	9.26971
ENSMUSG00000022890	Atp5j	7.94185	7.90478	7.90298	7.53538	7.46218	7.29044	8.2814	8.39998	8.59507
ENSMUSG00000038690	Atp5j2	7.75843	7.58429	7.32472	7.58192	7.73477	7.63054	7.94877	7.98209	8.49175
ENSMUSG00000050856	Atp5k	6.77132	6.58572	6.63226	6.72437	6.83424	6.71875	6.58027	6.54239	7.24777
ENSMUSG00000038717	Atp5l	4.70036	4.5259	4.42323	4.22505	4.37995	4.54139	4.59645	5.04085	4.8113
ENSMUSG00000084168	Atp5l2	-0.443622	-0.514787	-0.624303	-0.595124	-0.453839	-0.60607	-0.507228	-0.502702	-0.49101
ENSMUSG00000072460	Atp5l-ps1	-0.19859	-0.17563	-0.165899	-0.0883811	0.039445	-0.106696	-0.292843	-0.290613	-0.148013
ENSMUSG00000022956	Atp5o	7.49137	6.93204	7.14794	7.97583	8.13866	7.80293	7.71235	7.899	8.4174
ENSMUSG00000054894	Atp5s	3.77328	3.37207	3.72532	4.38956	3.70745	3.91773	3.86794	3.64292	3.84122
ENSMUSG00000057229	Atp5sl	6.40791	6.2653	6.14075	6.12219	5.78286	5.96051	6.04459	6.19659	6.04429
ENSMUSG00000019087	Atp6ap1	11.2358	11.6224	11.0229	11.3419	11.3341	11.2694	12.532	12.4442	12.6852
ENSMUSG00000078958	Atp6ap1l	2.35939	2.33698	2.57625	2.42018	2.13333	2.12984	1.95147	1.85986	1.77275
ENSMUSG00000031007	Atp6ap2	9.8083	10.0106	9.74678	10.3779	10.293	10.3254	11.4322	11.4062	11.915
ENSMUSG00000019302	Atp6v0a1	11.6923	11.9106	11.7197	11.1577	11.0924	11.0946	11.7018	12.1958	11.543
ENSMUSG00000038023	Atp6v0a2	8.2182	8.12699	8.20103	8.16191	8.26256	8.06806	8.35612	8.43775	8.48483
ENSMUSG00000038600	Atp6v0a4	4.71187	4.83435	4.61496	4.88747	5.01328	5.04191	4.53799	4.00089	3.91435
ENSMUSG00000033379	Atp6v0b	10.6902	10.7565	10.4347	10.2022	10.1506	10.107	11.4592	11.3155	11.6615
ENSMUSG00000024121	Atp6v0c	8.28042	7.1748	8.23679	7.18093	6.72471	7.23266	8.01155	8.63384	8.16087
ENSMUSG00000013160	Atp6v0d1	10.2752	10.3484	10.1085	10.5297	10.5813	10.5202	10.7606	10.8181	11.0371
ENSMUSG00000028238	Atp6v0d2	3.88797	3.88582	3.9995	4.36835	4.13959	4.0051	4.20047	3.8336	3.61912
ENSMUSG00000015575	Atp6v0e	9.62742	9.81199	9.52316	9.99703	10.0206	9.94314	10.2271	10.1187	10.5699
ENSMUSG00000039347	Atp6v0e2	2.36081	2.38461	2.24913	2.73794	2.76147	2.56437	2.42079	2.16543	2.58038
ENSMUSG00000052459	Atp6v1a	10.2726	10.276	10.1227	11.9982	11.9611	11.8815	11.7849	11.9417	12.3544
ENSMUSG00000006269	Atp6v1b1	3.56629	3.34466	3.15318	3.38937	3.30543	3.68231	3.50496	3.17653	3.01338
ENSMUSG00000006273	Atp6v1b2	11.7231	11.9235	11.6406	12.0809	12.0952	12.0402	12.765	12.9631	13.0058
ENSMUSG00000022295	Atp6v1c1	8.31085	8.37165	8.35873	8.15517	8.2861	8.30828	8.96273	9.05907	9.5445
ENSMUSG00000020566	Atp6v1c2	3.98402	3.82361	3.146	3.80028	3.70355	3.45471	3.88375	3.51174	3.46307
ENSMUSG00000021114	Atp6v1d	9.59512	9.95616	9.61641	10.1945	10.1229	9.98082	10.3335	10.298	10.7027
ENSMUSG00000019210	Atp6v1e1	10.1012	10.166	9.97806	10.4844	10.5124	10.4134	10.1446	10.2745	10.7161
ENSMUSG00000053375	Atp6v1e2	2.43511	2.20512	1.86078	2.64365	2.37783	2.37354	1.96511	1.87253	2.02245
ENSMUSG00000004285	Atp6v1f	8.21298	8.2046	7.88418	8.05234	8.20232	8.05691	9.11826	9.06989	9.41869
ENSMUSG00000039105	Atp6v1g1	9.71982	9.9881	9.59422	10.2341	10.2173	10.2217	10.5057	10.4723	10.9587
ENSMUSG00000024403	Atp6v1g2	7.46928	7.48303	7.46952	6.4292	6.31528	6.14607	7.00909	6.87285	6.65875
ENSMUSG00000026394	Atp6v1g3	2.12733	2.66487	2.40538	2.08183	2.03788	2.16077	2.40146	1.99874	2.03899
ENSMUSG00000033793	Atp6v1h	7.6464	7.13981	7.4184	6.98413	6.99344	6.82559	7.11351	7.15958	7.94731
ENSMUSG00000033792	Atp7a	10.7995	11.2571	10.8585	12.0421	11.9847	11.9183	11.779	12.1733	12.1072
ENSMUSG00000006567	Atp7b	4.56636	4.56101	4.19643	4.48564	4.67913	4.75956	4.35456	4.08833	3.9057
ENSMUSG00000037685	Atp8a1	11.5859	11.6328	11.6191	9.86178	9.95353	9.83381	11.1433	11.4886	11.3057
ENSMUSG00000021983	Atp8a2	5.93707	5.70716	6.161	5.35285	5.32988	4.78643	5.51128	5.82197	5.34908
ENSMUSG00000039529	Atp8b1	4.86231	5.06608	5.00155	5.00101	4.78016	5.06874	4.73291	4.36077	4.41768
ENSMUSG00000060671	Atp8b2	6.64191	6.32192	6.60645	7.19083	7.17108	7.1137	6.95777	6.78476	6.92888
ENSMUSG00000003341	Atp8b3	4.41708	4.71852	4.45797	4.52704	4.61593	4.45625	4.21839	3.80083	4.00914
ENSMUSG00000060131	Atp8b4	12.7411	12.81	12.7737	10.8416	10.8538	10.9069	11.7074	11.922	11.877
ENSMUSG00000028457	Atp8b5	5.69121	5.58761	5.4222	5.57394	5.80877	5.69377	5.25246	4.75854	4.83264
ENSMUSG00000027546	Atp9a	4.80287	4.77245	4.8536	4.7617	5.11022	4.94807	4.75726	4.2758	3.87133
ENSMUSG00000024566	Atp9b	8.98562	8.89061	8.77363	9.1902	9.3173	9.21336	9.2771	9.49652	9.68445
ENSMUSG00000028710	Atpaf1	4.72443	4.16239	4.72616	5.15865	4.77559	4.76685	4.27428	4.48095	4.87015
ENSMUSG00000042709	Atpaf2	5.60944	5.38758	5.36525	5.39238	5.40116	4.93952	5.85426	5.76908	6.20777
ENSMUSG00000054428	Atpif1	7.58302	7.29819	7.59088	8.89641	8.92376	8.6748	8.41978	8.47549	8.93693
ENSMUSG00000032409	Atr	8.15365	7.98203	8.07733	8.49889	8.32203	8.3695	8.38641	8.51815	9.25911
ENSMUSG00000013622	Atraid	6.57833	6.00658	6.29865	5.7788	5.83718	5.41828	5.8416	5.78328	6.16567
ENSMUSG00000025646	Atrip	7.76774	7.70739	7.60369	8.83587	8.82812	8.7424	8.54392	8.76816	8.57479
ENSMUSG00000027312	Atrn	12.2719	12.4793	12.3145	10.7419	10.5868	10.7199	11.9625	12.1521	12.0857
ENSMUSG00000054843	Atrnl1	9.79316	9.87019	9.83961	10.5945	10.5926	10.6375	10.9498	11.3908	11.2689
ENSMUSG00000031229	Atrx	12.1096	12.1893	12.2139	11.9092	11.9328	11.8416	12.5955	12.7365	12.8363
ENSMUSG00000046876	Atxn1	9.86943	10.0702	9.94468	9.28803	9.31694	9.34198	10.1673	10.57	10.2248
ENSMUSG00000016541	Atxn10	11.5288	11.6013	11.491	10.8724	10.8391	10.8565	12.4663	12.5146	12.5271
ENSMUSG00000069895	Atxn1l	10.2393	10.5017	10.169	9.91431	9.78429	9.77221	10.6369	10.8223	10.7071
ENSMUSG00000042605	Atxn2	9.32934	9.35787	9.45231	8.95598	8.90995	8.93158	9.43619	9.9824	9.35884
ENSMUSG00000032637	Atxn2l	10.5425	10.4141	10.6882	9.96379	10.0432	10.1028	10.8976	11.5815	10.8321
ENSMUSG00000021189	Atxn3	9.96313	10.3499	9.89275	9.49794	9.61293	9.48233	10.8882	10.8708	11.0496
ENSMUSG00000021738	Atxn7	9.61748	9.72236	9.67097	8.34725	8.22635	8.34386	8.9054	9.23428	9.03525
ENSMUSG00000020564	Atxn7l1	10.655	10.5385	10.8339	9.45439	9.43039	9.39675	9.65091	10.3159	9.60616
ENSMUSG00000048997	Atxn7l2	6.6579	6.93069	6.9417	6.07235	6.46559	6.45464	7.11793	6.91727	6.59453
ENSMUSG00000059995	Atxn7l3	10.2963	10.3827	10.076	9.57977	9.6613	9.55372	11.1954	11.2588	11.2596
ENSMUSG00000074748	Atxn7l3b	10.6858	10.8838	10.5015	10.0087	10.1033	9.90693	10.6762	10.8404	10.9113
ENSMUSG00000074804	AU015228	2.80303	3.03886	2.97601	2.95351	2.78203	2.8758	2.62009	2.55743	2.51713
ENSMUSG00000090203	AU015336	1.61053	1.6746	1.79893	2.25584	1.86617	1.86295	1.79611	1.71343	1.75051
ENSMUSG00000055936	AU015836	2.19647	2.63934	2.42124	3.38009	3.28913	3.04714	2.51147	2.92639	2.49183
ENSMUSG00000081044	AU015836	3.40784	3.85951	3.56221	4.28865	4.23223	4.05312	3.61533	3.81219	3.54234
ENSMUSG00000073377	AU016765	1.91817	2.38756	2.20679	2.16178	2.70426	2.22598	2.20323	1.71556	1.74588
ENSMUSG00000054753	AU018091	4.35829	4.26425	4.59357	5.00189	4.87352	4.73692	4.06572	4.37228	3.79031
ENSMUSG00000097916	AU018091	0	0	0	0	0	0	0	0	0
ENSMUSG00000059820	AU019823	7.85805	8.06636	8.02967	7.12097	7.32289	7.31136	8.20721	8.23734	8.20711
ENSMUSG00000074783	AU019990	6.02561	5.52118	6.35642	4.30179	4.75032	4.79228	4.27777	4.73451	4.60978
ENSMUSG00000097415	AU020206	3.66628	3.08995	4.14007	4.66691	4.70354	4.74486	5.78412	6.25343	5.52221
ENSMUSG00000051669	AU021092	3.00789	3.0919	2.84354	2.8463	3.21673	2.77233	2.69299	2.54932	2.03508
ENSMUSG00000078584	AU022252	6.24463	5.9713	6.2002	6.65796	6.30926	6.60818	6.71053	6.76289	6.65432
ENSMUSG00000073294	AU022751	1.56049	1.62914	1.34116	1.88683	1.58951	1.83254	1.82749	1.46577	1.49584
ENSMUSG00000097209	AU022754	2.26059	2.67437	2.0885	3.01653	3.55243	2.63957	2.4841	2.10258	2.3721
ENSMUSG00000093771	AU023070	0.314051	0.53489	0.255121	0.174495	0.165488	0.458794	0.463823	0.259844	0.143045
ENSMUSG00000073414	AU023871	4.09946	4.20353	4.45421	3.89326	4.08885	4.14601	4.14885	4.14367	4.32602
ENSMUSG00000028830	AU040320	9.27484	9.08326	9.14707	8.44255	8.37821	8.37712	8.46053	8.84766	8.58976
ENSMUSG00000091523	AU040972	3.65484	4.03693	4.00654	4.87544	4.43516	5.06854	4.78558	5.31577	5.02657
ENSMUSG00000078435	AU041133	3.83113	3.28171	3.82427	3.77595	3.60331	3.74522	3.19421	3.29497	3.79649
ENSMUSG00000021460	Auh	9.10432	9.22573	9.10281	9.21543	9.22528	9.21936	10.4139	10.9229	10.6414
ENSMUSG00000078521	Aunip	3.83189	3.50684	3.51948	3.14398	2.8483	2.72054	3.29729	3.06182	3.46474
ENSMUSG00000068328	Aup1	10.1425	10.2205	9.95367	9.57039	9.6329	9.62313	10.3589	10.3431	10.4142
ENSMUSG00000027496	Aurka	6.73271	5.96584	6.72328	5.66584	5.44594	5.27761	6.60775	6.70944	7.05796
ENSMUSG00000065990	Aurkaip1	9.05695	8.90061	8.76638	7.82789	8.12713	7.99321	8.90425	9.01771	9.27223
ENSMUSG00000020897	Aurkb	7.20545	6.55621	7.23678	5.62432	5.27742	5.46715	6.68467	6.67739	6.9283
ENSMUSG00000070837	Aurkc	-0.00670289	0.123348	-0.190414	-0.157856	-0.165033	0.129813	-0.0696044	0.0478862	-0.182896
ENSMUSG00000029673	Auts2	5.7868	5.90048	5.91616	6.41217	6.38781	6.26689	5.51895	5.19671	4.75501
ENSMUSG00000098133	Auts2	0.735937	0.68561	0.588153	0.976585	0.808753	0.663543	0.460989	0.710363	0.611009
ENSMUSG00000087519	AV039307	5.53511	6.51386	5.82075	5.59966	5.8639	5.44452	6.66923	6.75836	6.69263
ENSMUSG00000086381	AV064505	1.52633	1.59512	1.62402	1.7278	1.80211	1.90737	1.30227	1.53767	1.19901
ENSMUSG00000087377	AV099323	2.13303	2.48389	2.34762	3.04066	2.77979	2.95572	2.81511	2.62548	2.51132
ENSMUSG00000054994	AV320801	-1.5447	-1.4489	-1.44533	-1.50742	-1.51333	-1.51374	-1.44566	-1.53302	-1.52817
ENSMUSG00000003604	Aven	4.69213	4.52575	4.41247	4.80577	5.07738	5.14226	4.88392	4.95608	4.78257
ENSMUSG00000025432	Avil	6.42543	6.5523	6.47328	5.07098	5.08484	5.25434	6.80486	7.0263	6.59071
ENSMUSG00000029787	Avl9	10.6827	11.0379	10.6176	11.0473	11.0475	10.9996	11.631	11.7521	11.8658
ENSMUSG00000037727	Avp	1.25492	1.40524	1.02836	0.979202	1.12101	1.71789	1.43244	1.0351	1.05601
ENSMUSG00000018821	Avpi1	3.33366	2.8557	2.98346	2.93721	3.09065	3.66169	3.67686	3.56857	3.65223
ENSMUSG00000020123	Avpr1a	2.86757	2.99224	3.5058	3.27066	2.99491	3.87067	3.03917	2.83539	2.89886
ENSMUSG00000026432	Avpr1b	4.4526	4.46237	4.63432	4.85527	4.44063	4.53589	3.96172	3.89143	3.42699
ENSMUSG00000031390	Avpr2	10.1674	10.3123	10.175	9.80187	9.77601	9.73885	9.90741	10.1711	9.86101
ENSMUSG00000078349	AW011738	3.24538	3.55188	3.18112	3.75684	3.86752	3.11671	3.80116	3.88047	3.61314
ENSMUSG00000097428	AW047730	3.5051	3.75665	3.86875	4.33503	3.48125	4.04966	3.61323	3.01462	3.54895
ENSMUSG00000075010	AW112010	3.62399	3.3547	3.48734	4.37772	4.32097	4.47218	4.25939	4.54756	4.77687
ENSMUSG00000097301	AW121686	6.38853	6.8916	6.58173	6.50584	6.38892	6.67896	6.69724	7.10473	6.93238
ENSMUSG00000074166	AW146154	4.43636	4.56512	4.70519	4.64048	4.22511	4.28163	4.42871	4.61175	4.64668
ENSMUSG00000039182	AW209491	6.06688	5.68676	5.54607	4.61402	4.55395	4.66387	5.64965	5.39656	5.66714
ENSMUSG00000087334	AW495222	3.36729	3.42113	3.26707	3.47373	3.03259	3.12461	3.07292	3.10017	2.93826
ENSMUSG00000041935	AW549877	9.0939	8.82443	9.23054	8.7891	8.84032	8.72554	9.48942	9.93432	10.0526
ENSMUSG00000038112	AW551984	4.76154	4.88699	4.63188	5.38992	5.46965	5.24356	4.35259	4.20779	4.14768
ENSMUSG00000033632	AW554918	7.07295	6.93693	7.24805	6.65827	6.46127	6.91698	6.82248	6.90292	7.00081
ENSMUSG00000058537	AW822073	5.37529	5.40392	5.51389	5.91357	5.93928	6.12213	5.15637	4.56305	4.91306
ENSMUSG00000085998	AW822252	-1.06623	-0.731776	-1.05824	-1.02098	-0.890374	-0.891015	-1.05846	-1.05718	-1.0535
ENSMUSG00000015665	Awat1	3.02764	2.77314	2.82041	2.82125	2.85209	2.40495	2.74663	2.69654	2.58621
ENSMUSG00000031220	Awat2	2.90709	2.92159	2.62002	3.04571	2.87692	2.8719	2.69497	2.71877	2.41029
ENSMUSG00000026601	Axdnd1	5.92981	6.1226	5.81734	6.62896	6.64074	6.51357	6.61206	6.63315	6.67852
ENSMUSG00000024182	Axin1	8.88381	9.05113	8.79778	8.37807	8.53192	8.5775	9.31887	9.43777	9.44891
ENSMUSG00000000142	Axin2	4.55565	4.57693	5.16866	4.72478	5.02728	4.64204	4.00843	3.54994	3.71035
ENSMUSG00000002602	Axl	5.47091	5.36899	5.65322	7.295	7.18762	6.78446	8.25265	8.12397	7.6974
ENSMUSG00000045999	AY036118	9.94678	9.79736	9.5616	10.1496	10.6566	10.4269	11.0288	11.554	11.7245
ENSMUSG00000044820	AY074887	3.73791	3.47805	3.05978	3.54312	3.6981	3.76361	3.69317	3.56528	4.13239
ENSMUSG00000050961	AY358078	2.27295	2.14555	2.34225	2.09187	2.49648	2.04456	2.6066	2.10572	1.93709
ENSMUSG00000068180	AY512915	4.36561	4.2086	4.43494	4.71474	4.93117	4.84537	3.9575	3.64031	3.50306
ENSMUSG00000066158	AY512931	3.4225	3.47019	3.68458	3.64441	3.76995	3.89056	3.46931	3.01718	3.08451
ENSMUSG00000067581	AY702102	2.28252	2.5269	2.41757	2.82703	2.66105	2.44959	2.14165	2.51531	2.30548
ENSMUSG00000067103	AY702103	4.82039	4.41719	4.38216	4.38533	4.748	4.94507	4.33578	4.00588	4.10067
ENSMUSG00000058618	AY761184	0.133545	-0.150094	0.197692	0.213567	0.0428696	-0.118173	-0.145988	-0.015216	-0.137249
ENSMUSG00000079120	AY761185	0.457224	-0.0427459	0.194894	-0.00151195	0.147066	0.145826	0.083233	-0.0360769	0.102747
ENSMUSG00000053873	Aym1	-1.79302	-1.78728	-1.84374	-1.82584	-1.82974	-1.83001	-1.84396	-1.84271	-1.83951
ENSMUSG00000037053	Azgp1	2.94398	2.42308	2.61731	2.56366	2.80343	2.70569	2.37518	2.09672	2.24868
ENSMUSG00000039781	Azi1	6.01809	5.92412	6.07205	5.47397	5.57025	5.36006	5.21309	5.09304	5.35224
ENSMUSG00000039285	Azi2	10.0482	10.1374	9.97126	9.99339	9.80227	9.76311	10.7907	10.9757	11.1897
ENSMUSG00000037458	Azin1	11.4154	11.8354	11.4424	11.6069	11.5918	11.4348	11.5532	11.6454	11.9692
ENSMUSG00000096144	B020004C17Rik	2.97015	2.91367	3.0302	3.26786	3.18506	3.00105	3.08866	3.05297	2.41972
ENSMUSG00000035201	B020004J07Rik	2.48804	2.95603	2.40165	2.80498	2.82734	2.52322	2.30749	2.41865	2.37557
ENSMUSG00000078184	B020018G12Rik	2.08358	2.08188	2.01648	2.37944	2.43065	2.86755	2.28942	2.31042	1.9584
ENSMUSG00000078537	B020031M17Rik	-0.74363	-0.61626	-0.207694	-0.700291	-0.710722	-0.554569	-0.733886	-0.732272	-0.728122
ENSMUSG00000075596	B130006D01Rik	8.5034	8.74215	8.77662	7.47605	7.46018	7.44858	8.05648	8.27671	8.00602
ENSMUSG00000085113	B130011K05Rik	3.28006	3.52689	3.63778	3.74707	3.57776	3.6438	3.30337	3.12788	2.74791
ENSMUSG00000062383	B130024G19Rik	0.348804	0.152995	0.60554	0.531436	0.502989	0.355781	0.158328	0.161503	0.307913
ENSMUSG00000093606	B130034C11Rik	2.92236	2.72108	3.58621	3.02778	3.04593	2.84793	2.83799	2.78734	2.36363
ENSMUSG00000097414	B130046B21Rik	9.36563	9.44937	9.25203	9.05978	9.14683	8.95995	9.17136	9.18079	9.34525
ENSMUSG00000086502	B130055M24Rik	5.52562	5.56281	5.92928	4.56383	4.68879	4.89056	5.47024	5.92505	5.77821
ENSMUSG00000086777	B230104C08Rik	2.6364	2.3763	2.25212	2.838	2.25058	2.66881	1.95046	2.17528	1.87937
ENSMUSG00000097871	B230104I21Rik	2.66951	2.73212	2.43042	2.52697	2.35111	2.76128	2.57905	2.27129	1.98288
ENSMUSG00000097547	B230110C06Rik	2.65438	2.57478	2.17263	3.23401	2.71807	3.2092	1.80451	2.2923	2.11752
ENSMUSG00000086715	B230112J18Rik	1.16403	1.39874	1.24293	0.973394	1.61423	1.38468	1.24074	1.02961	0.91433
ENSMUSG00000027165	B230118H07Rik	5.2186	4.73312	5.20263	5.08795	5.33988	5.26198	4.80734	4.85119	5.17453
ENSMUSG00000087024	B230119M05Rik	1.94115	1.59555	1.90844	1.93326	2.00355	1.99993	1.90537	1.62878	1.6605
ENSMUSG00000086844	B230206H07Rik	4.22789	4.26748	4.34154	4.40171	4.51076	4.77922	4.17009	3.91195	4.4755
ENSMUSG00000086003	B230206L02Rik	2.86907	2.99773	2.88157	2.3833	2.68127	2.45501	2.15086	2.54859	2.76528
ENSMUSG00000092492	B230208B08Rik	-0.940337	-0.933911	-0.931191	-0.745106	-0.904479	-0.755701	-0.931446	-0.798498	-0.661152
ENSMUSG00000097378	B230208H11Rik	8.71034	8.37214	8.62443	6.7175	6.28524	6.22756	7.24638	7.54754	7.20516
ENSMUSG00000097881	B230209K01Rik	3.12905	3.08661	2.84134	3.63733	3.67814	3.67127	3.26223	2.94475	2.52077
ENSMUSG00000071112	B230216G23Rik	3.96918	3.67097	3.68143	4.35036	4.1826	4.17491	3.56017	3.39645	3.47541
ENSMUSG00000089706	B230216N24Rik	6.47074	6.27511	6.69639	6.38662	6.5204	6.57705	6.01306	6.29824	6.14317
ENSMUSG00000089676	B230217C12Rik	2.95326	2.9367	3.13429	3.77309	3.60584	3.59922	3.26159	3.0853	3.4925
ENSMUSG00000050538	B230217C12Rik	3.50901	3.3878	3.50747	3.9705	3.80012	3.92661	3.66918	3.64903	3.78882
ENSMUSG00000097785	B230217O12Rik	4.32321	4.06815	4.01825	3.54972	2.89773	4.05725	3.78156	3.91459	3.85235
ENSMUSG00000045767	B230219D22Rik	10.166	10.2041	10.0835	10.0114	10.0163	9.90038	10.3037	10.4508	10.6494
ENSMUSG00000080717	B230307C23Rik	5.12532	4.97443	4.79657	4.92329	4.79549	5.40557	4.8821	5.14711	5.00744
ENSMUSG00000084843	B230312C02Rik	3.57301	3.62108	3.68677	3.88004	3.93789	3.77179	5.03781	4.97018	4.90347
ENSMUSG00000085153	B230314M03Rik	3.85346	3.98386	3.89135	3.45682	3.77752	3.26911	3.64884	3.68228	3.24316
ENSMUSG00000073779	B230314M03Rik	5.11473	5.02464	5.48496	4.58501	4.73725	4.19366	4.99958	4.9337	4.37403
ENSMUSG00000045746	B230317F23Rik	2.63961	2.68451	2.72975	2.43655	2.73105	2.72642	2.57386	3.00908	2.88483
ENSMUSG00000051844	B230319C09Rik	6.76015	6.62506	6.82738	5.45878	5.61922	5.77111	7.17977	8.07186	7.09419
ENSMUSG00000097509	B230322F03Rik	2.7688	2.54653	2.87795	2.70006	3.10249	2.83795	2.66327	2.42967	2.66427
ENSMUSG00000097623	B230323A14Rik	3.26623	3.4094	3.35502	3.49091	3.8298	3.62689	3.15726	3.25405	2.93262
ENSMUSG00000063254	B230325K18Rik	7.31641	7.30627	7.77888	7.43262	6.86388	7.34361	8.25264	9.83834	8.35215
ENSMUSG00000097800	B230344G16Rik	2.80341	2.98371	2.97638	2.85085	2.97327	2.67168	2.84306	2.72304	2.30443
ENSMUSG00000097119	B230354K17Rik	6.92439	7.36858	6.87053	7.41396	7.36867	7.35714	8.16651	8.23609	8.50578
ENSMUSG00000087666	B230359F08Rik	2.26135	2.29045	2.0789	1.9322	2.27778	2.57178	2.39987	2.2691	1.80252
ENSMUSG00000096963	B230364G03Rik	2.58183	2.81797	2.80527	2.501	2.94382	2.44145	2.59223	2.45078	2.40858
ENSMUSG00000086350	B230369F24Rik	4.939	5.10003	5.4584	4.99388	4.16204	4.65834	5.10458	4.80942	5.10365
ENSMUSG00000097678	B230377A18Rik	0.508214	0.459947	0.368367	0.292739	0.434498	0.2829	0.570205	0.481875	0.503026
ENSMUSG00000086763	B230378P21Rik	3.21896	3.13926	3.19305	3.37668	3.11447	3.36668	3.05835	2.93917	3.15557
ENSMUSG00000087660	B230398E01Rik	5.18111	4.87322	5.13164	5.70373	4.80856	5.63848	5.65175	5.83758	5.80416
ENSMUSG00000060802	B2m	12.5162	12.7764	12.3575	13.3791	13.373	13.294	13.1459	13.0913	13.8259
ENSMUSG00000048406	B330016D10Rik	5.84949	5.78752	6.09031	5.41096	5.42187	5.75751	5.82128	5.98441	5.86995
ENSMUSG00000043300	B3galnt1	3.44548	2.88293	3.55553	3.8277	3.31859	3.49128	3.9654	3.33929	4.09535
ENSMUSG00000039242	B3galnt2	9.65755	9.78997	9.58376	8.83193	8.63623	8.62895	9.6465	9.76799	9.87344
ENSMUSG00000034780	B3galt1	3.61305	4.09808	4.0558	4.05904	4.18895	3.88045	3.2465	3.27635	3.09871
ENSMUSG00000033849	B3galt2	7.38828	7.48327	7.42939	6.29673	6.49211	6.83802	7.38902	8.17945	7.61825
ENSMUSG00000067370	B3galt4	5.4443	4.79035	5.14773	4.32147	4.67667	4.05482	4.65138	4.26448	4.49957
ENSMUSG00000074892	B3galt5	3.99114	4.08715	4.19831	4.15207	4.39566	4.38764	3.82754	3.91502	3.64901
ENSMUSG00000050796	B3galt6	4.70744	4.40464	4.57998	3.87228	3.93737	3.93017	4.20588	4.3672	4.90077
ENSMUSG00000051950	B3galtl	4.53892	4.47914	4.84271	4.98935	4.86138	4.3355	4.68439	4.43936	4.69687
ENSMUSG00000045994	B3gat1	3.9434	3.94901	3.77079	4.7709	4.48098	4.26917	3.9654	3.68628	3.50772
ENSMUSG00000026156	B3gat2	8.8846	8.94795	8.91438	8.32888	8.17698	8.26857	9.17239	9.41001	9.33543
ENSMUSG00000071649	B3gat3	7.77568	7.71599	7.80423	7.22181	7.47189	7.40972	8.34476	8.35433	8.43354
ENSMUSG00000047379	B3gnt1	3.91107	3.40083	3.59495	4.00365	4.39615	4.16282	4.41002	3.80274	4.85622
ENSMUSG00000051650	B3gnt2	9.55191	9.45496	9.52991	9.41345	9.50342	9.48125	10.5671	10.7263	10.8624
ENSMUSG00000031803	B3gnt3	3.78536	3.53285	3.71548	4.33651	4.28139	4.32813	4.05985	4.30061	4.0994
ENSMUSG00000029431	B3gnt4	3.89505	3.50547	3.62467	3.81368	3.55145	3.92635	4.00819	3.86371	4.22151
ENSMUSG00000022686	B3gnt5	5.52766	5.33325	5.4446	5.90023	5.85828	6.16103	5.24638	5.18668	5.73345
ENSMUSG00000074004	B3gnt6	3.1711	2.99826	2.85132	2.93183	2.75629	2.95515	3.10448	2.6326	2.85921
ENSMUSG00000079445	B3gnt7	3.02873	3.15952	3.63025	3.21536	2.69492	3.1314	3.48475	3.46601	3.10289
ENSMUSG00000059479	B3gnt8	5.6756	5.66354	5.67814	6.40599	6.3693	6.37722	6.31119	6.38699	6.46726
ENSMUSG00000069920	B3gnt9	6.53214	6.75609	6.80851	7.32047	7.1444	7.29942	7.23575	7.28264	7.22484
ENSMUSG00000046605	B3gntl1	6.9957	7.0016	6.97156	6.18384	6.21993	5.8288	6.92997	6.4553	6.43089
ENSMUSG00000084960	B430010I23Rik	10.825	11.307	10.9091	9.70475	9.7139	9.668	10.4174	10.9921	10.4811
ENSMUSG00000086432	B430119L08Rik	0.638505	0.949864	0.582649	0.678688	0.657464	0.796433	0.79485	0.588044	0.471507
ENSMUSG00000097477	B430202K04Rik	1.61396	1.77145	1.53369	1.86097	1.69117	1.80659	1.18176	1.64445	1.20602
ENSMUSG00000067356	B430203G13Rik	3.43358	3.79152	3.65252	4.53258	4.31731	4.20497	3.01297	3.4996	3.44266
ENSMUSG00000046415	B430212C06Rik	5.82167	6.25486	5.80018	5.49844	5.57032	5.62492	6.2559	6.70666	6.31627
ENSMUSG00000097411	B430218F22Rik	3.87566	3.10189	3.34661	3.08419	3.30747	3.68511	3.34131	3.17809	3.25042
ENSMUSG00000085211	B430219N15Rik	5.70295	5.54047	4.91265	5.83221	6.11374	5.67519	6.09981	6.01937	6.24945
ENSMUSG00000053706	B430305J03Rik	6.59052	6.79778	6.37066	6.98851	6.73705	6.39374	6.76011	7.22873	7.17628
ENSMUSG00000043740	B430306N03Rik	12.7334	13.0388	12.7684	12.6664	12.6392	12.6137	12.9734	13.1661	13.0538
ENSMUSG00000073866	B430319F04Rik	5.95454	6.10114	6.08206	5.08108	5.28301	4.93828	4.8775	4.88956	5.13328
ENSMUSG00000085532	B430319H21Rik	2.32774	2.04911	2.40779	2.08175	2.38908	2.57635	1.98177	2.18762	1.92653
ENSMUSG00000006731	B4galnt1	9.5156	9.52466	9.3901	8.07087	8.20593	8.12402	8.87613	9.20042	8.90516
ENSMUSG00000013418	B4galnt2	3.10219	3.23746	3.04529	3.5961	3.09532	2.77189	3.28846	2.9964	3.13771
ENSMUSG00000041372	B4galnt3	4.48724	4.29159	4.3653	4.23923	4.19209	3.98948	3.84529	3.93292	3.66763
ENSMUSG00000055629	B4galnt4	3.86973	4.2113	3.9878	3.78383	3.6882	3.42567	3.70207	3.68221	3.51997
ENSMUSG00000028413	B4galt1	9.93509	9.97525	9.80356	10.2224	10.3144	10.2007	10.8318	11.0164	10.9395
ENSMUSG00000028541	B4galt2	5.20685	5.60039	5.4047	5.69704	5.41975	5.37452	5.96251	5.96663	5.9618
ENSMUSG00000052423	B4galt3	10.6199	10.8375	10.4778	10.5625	10.5355	10.4214	10.4183	10.4831	10.3033
ENSMUSG00000022793	B4galt4	4.38084	3.98527	4.34727	4.16472	4.19044	4.41431	4.54617	4.03761	4.22819
ENSMUSG00000017929	B4galt5	8.83788	8.45484	8.70118	9.42389	9.59023	9.50965	8.35666	8.64962	8.85677
ENSMUSG00000056124	B4galt6	8.13269	7.7255	8.30278	8.54835	8.56773	8.88211	7.76853	8.45224	8.35051
ENSMUSG00000021504	B4galt7	6.91885	6.72282	6.67906	6.88521	6.90857	6.82272	8.39404	8.25352	8.60806
ENSMUSG00000044633	B530045E10Rik	3.98826	4.4096	4.01917	4.04946	4.15044	3.78388	4.54086	4.3055	4.1912
ENSMUSG00000042742	B630005N14Rik	9.65493	10.0235	9.6051	9.55777	9.47672	9.27736	10.343	10.3779	10.6521
ENSMUSG00000068463	B630019A10Rik	3.53356	2.88093	3.58338	3.56058	3.31009	3.21746	2.92492	3.16811	2.64402
ENSMUSG00000052364	B630019K06Rik	2.36231	2.08665	2.58546	2.92925	3.17508	2.754	2.41432	2.34154	2.74499
ENSMUSG00000098202	B830012L14Rik	4.38344	4.32307	4.5513	5.02962	5.35668	4.93246	4.47033	4.47298	4.21205
ENSMUSG00000091993	B930036N10Rik	7.14299	7.43381	6.84089	6.38688	6.94853	6.85308	6.98934	7.20605	7.44137
ENSMUSG00000074738	B930041F14Rik	2.65067	2.57509	2.61962	2.16581	2.71289	3.04412	2.28722	2.30622	2.45053
ENSMUSG00000091921	B930041F14Rik	2.65067	2.57509	2.61962	2.16581	2.71289	3.04412	2.28722	2.30622	2.45053
ENSMUSG00000094143	B930078G14Rik	5.74827	5.77318	5.73425	5.19053	5.22152	5.35976	5.23303	5.22845	5.31962
ENSMUSG00000097734	B930082K07Rik	4.03598	3.90844	3.83872	3.97123	4.18154	3.63441	3.5641	3.40185	3.9577
ENSMUSG00000085244	B930086A06Rik	4.00498	3.53242	3.80563	4.36729	3.83328	3.82629	3.69838	3.29373	3.44399
ENSMUSG00000092124	B930094E09Rik	4.73562	4.01299	4.3784	4.19963	3.59555	4.15149	4.70036	4.62025	4.65879
ENSMUSG00000085133	B930095G15Rik	5.20982	5.38574	5.24168	4.25463	4.21429	4.27417	4.5537	4.55909	4.32304
ENSMUSG00000001039	B9d1	2.33641	2.57324	2.54929	2.23827	2.31713	2.72417	2.31139	2.33109	2.46929
ENSMUSG00000063439	B9d2	5.97732	5.96155	5.80434	5.92322	5.77352	6.21122	6.74367	6.93281	6.57739
ENSMUSG00000022296	Baalc	2.33257	2.20093	1.8259	2.04106	1.86732	1.86449	2.00669	1.93495	1.76557
ENSMUSG00000039653	Baat	3.09906	3.33955	2.83905	3.11002	3.64493	3.1208	2.98233	3.00968	2.17908
ENSMUSG00000031820	Babam1	6.78726	5.90017	6.70556	6.8282	7.04814	6.64048	6.74547	6.7289	7.34551
ENSMUSG00000032086	Bace1	8.97509	8.52198	8.92559	8.41693	8.25169	8.38434	8.23789	8.8169	8.33499
ENSMUSG00000040605	Bace2	3.47406	3.62512	3.73463	3.64881	3.20259	3.38508	3.63334	3.44813	3.3984
ENSMUSG00000025612	Bach1	12.1464	12.5162	12.0687	12.4374	12.3668	12.3605	13.1993	13.3129	13.5242
ENSMUSG00000040270	Bach2	5.66406	5.30986	5.80417	6.03328	6.02982	5.92411	6.01919	5.89625	5.6972
ENSMUSG00000024959	Bad	7.16548	6.91171	7.11014	7.29444	7.47568	7.30224	7.59507	7.7986	7.91779
ENSMUSG00000028416	Bag1	8.71316	8.66699	8.55805	8.47718	8.49279	8.25309	9.25039	9.16985	9.51983
ENSMUSG00000042215	Bag2	3.92419	3.57707	3.58335	3.68273	3.31745	3.74004	4.04577	3.77167	3.90959
ENSMUSG00000030847	Bag3	4.69879	4.40952	4.83836	4.8988	5.19222	5.25316	4.66718	5.02053	5.40965
ENSMUSG00000037316	Bag4	7.08404	7.08994	7.1458	7.35478	7.02853	7.14285	7.58948	7.72271	7.61458
ENSMUSG00000049792	Bag5	5.036	4.45821	4.93793	5.09909	5.051	4.61792	5.11719	4.7203	5.68564
ENSMUSG00000024392	Bag6	10.0833	10.1008	10.0854	10.121	10.1424	10.0578	10.516	10.8748	10.5746
ENSMUSG00000039741	Bahcc1	5.59834	5.27584	5.18036	5.08965	5.27388	5.26436	4.98865	5.06166	3.9922
ENSMUSG00000040007	Bahd1	6.53386	6.05209	6.62086	6.27767	6.54153	6.38633	5.96752	6.63287	6.5609
ENSMUSG00000034730	Bai1	4.90466	4.66435	4.6827	4.85247	4.58138	4.6719	4.23199	4.0806	4.06818
ENSMUSG00000028782	Bai2	4.78866	4.37116	4.88848	5.12748	5.14906	5.24399	4.93695	4.35524	4.31505
ENSMUSG00000033569	Bai3	5.16153	5.3146	5.42588	6.3237	5.6542	6.44067	5.0101	4.67869	4.75042
ENSMUSG00000025372	Baiap2	6.7671	6.63112	6.75835	6.70166	6.82936	6.74462	6.61889	6.77283	6.54803
ENSMUSG00000038859	Baiap2l1	6.26009	6.11973	6.50882	5.86748	6.30757	6.14218	6.9822	7.85015	7.12186
ENSMUSG00000018126	Baiap2l2	3.10342	3.03237	3.24872	2.79308	2.93345	2.609	3.08036	2.60571	2.46381
ENSMUSG00000047507	Baiap3	6.12816	5.46746	6.12854	4.89094	5.15103	5.14148	6.17158	5.78821	5.8201
ENSMUSG00000057789	Bak1	8.48467	8.38312	8.34694	8.49162	8.35895	8.28567	9.19271	9.04098	9.26384
ENSMUSG00000024232	Bambi	5.00802	5.26688	5.15788	5.22776	5.36313	5.54913	5.39144	5.46064	6.17145
ENSMUSG00000081219	Bambi-ps1	2.13144	1.98206	2.4716	2.00793	1.82569	1.96207	1.80998	2.42595	2.41357
ENSMUSG00000024844	Banf1	5.22072	4.9029	5.46533	5.27149	5.09234	5.38909	5.22761	5.71843	6.34419
ENSMUSG00000037307	Banf2	0.910901	0.904479	0.538682	0.466946	0.752535	0.610509	0.537575	0.543959	0.427607
ENSMUSG00000037922	Bank1	5.5698	5.35149	5.30958	4.00976	4.20403	4.50019	3.84516	3.88266	3.55568
ENSMUSG00000025316	Banp	8.73016	8.98809	8.7596	9.10872	8.91696	9.07278	9.49987	9.52916	9.61317
ENSMUSG00000021901	Bap1	8.98449	8.99899	8.75684	8.66267	8.77838	8.7787	9.53145	9.5451	9.6503
ENSMUSG00000026196	Bard1	6.73287	6.19771	6.63997	5.73105	5.47856	5.60703	6.21911	6.62254	6.66889
ENSMUSG00000026805	Barhl1	2.89313	3.08764	3.26912	3.84552	3.47078	3.73685	2.99573	2.86274	2.63401
ENSMUSG00000034384	Barhl2	3.11025	2.98635	3.03781	3.75005	3.78087	3.64521	3.35857	2.98328	2.77893
ENSMUSG00000021381	Barx1	0.903704	1.6374	1.0728	1.36688	1.32562	1.19082	0.953467	0.961615	0.842938
ENSMUSG00000032033	Barx2	2.57088	2.81425	2.57246	2.79535	2.91987	3.08214	2.64782	2.31378	2.64848
ENSMUSG00000045763	Basp1	9.90122	11.3894	9.7508	12.4222	12.4666	12.4076	13.5176	13.5718	13.8931
ENSMUSG00000034266	Batf	5.54914	5.74711	5.46126	8.61111	8.66288	8.61955	6.54133	6.83124	7.68122
ENSMUSG00000039699	Batf2	3.76612	3.69553	4.16563	4.43313	4.2106	4.1457	3.52322	3.42151	3.63921
ENSMUSG00000026630	Batf3	1.67109	1.61868	2.13877	2.21343	2.15805	2.3638	1.95946	1.97667	2.29059
ENSMUSG00000003873	Bax	7.3108	7.1838	7.07244	6.84643	6.95133	6.96824	8.45194	8.34644	9.00997
ENSMUSG00000035021	Baz1a	10.9937	11.1364	10.96	11.5911	11.517	11.472	12.333	12.5198	12.5368
ENSMUSG00000002748	Baz1b	11.2606	11.4838	11.2793	11.2356	11.2474	11.1546	11.7317	11.8881	11.8415
ENSMUSG00000040054	Baz2a	11.3418	11.3089	11.4429	11.1454	11.112	11.1072	11.2876	11.8433	11.1999
ENSMUSG00000026987	Baz2b	12.9874	13.0432	13.0498	11.9022	11.8789	11.8223	12.3351	12.6293	12.5105
ENSMUSG00000049008	BB014433	1.69829	1.69959	1.64279	1.30086	1.81781	1.81436	1.54531	1.45374	1.48306
ENSMUSG00000091526	BB019430	-0.54996	-0.4263	-0.41752	-0.509684	-0.362528	-0.363615	-0.308659	-0.413587	-0.533419
ENSMUSG00000085041	BB031773	4.14476	4.06122	4.56127	4.17034	4.60685	4.40675	3.84115	3.57791	3.59155
ENSMUSG00000085001	BB114351	2.96656	3.14897	2.90526	2.91429	2.94312	2.73466	2.96658	2.85623	2.57787
ENSMUSG00000085218	BB218582	2.8352	2.65211	2.54288	3.22136	2.58878	2.69209	2.15801	2.71819	2.52902
ENSMUSG00000079031	BB287469	-0.0548011	-0.153388	-0.0200725	0.0617198	0.322741	0.0424577	-0.0210398	-0.0154633	-0.139981
ENSMUSG00000092323	BB365896	3.51035	3.97317	3.87358	3.90549	4.06212	3.72526	4.03593	2.92874	3.26262
ENSMUSG00000084938	BB557941	1.6832	1.67333	1.94576	1.5284	1.49881	1.75957	1.69906	1.71438	1.65352
ENSMUSG00000002083	Bbc3	7.55633	7.84577	7.15112	7.03441	7.3089	6.91883	8.32676	8.2684	8.13818
ENSMUSG00000084957	Bbip1	8.79615	8.7189	8.56345	8.41115	8.24004	8.30357	8.821	8.86009	9.20514
ENSMUSG00000041660	Bbox1	3.63936	3.60825	3.5616	4.09844	3.72384	4.0446	3.71659	3.40271	3.33659
ENSMUSG00000006464	Bbs1	4.85737	5.03741	4.88195	4.92888	4.65117	5.19888	4.7194	4.8269	4.76673
ENSMUSG00000035759	Bbs10	5.18633	5.11309	5.24815	5.14071	4.81783	4.85863	5.4605	5.81395	5.60698
ENSMUSG00000051444	Bbs12	3.73546	3.16012	3.67412	3.72411	4.42899	4.11007	4.16393	3.52333	3.78916
ENSMUSG00000031755	Bbs2	5.68313	5.69778	5.78821	5.22	5.28346	5.19791	5.08954	5.24176	5.13479
ENSMUSG00000025235	Bbs4	8.34753	8.35125	8.66876	6.42634	6.73254	6.70473	6.60854	7.09482	6.87493
ENSMUSG00000063145	Bbs5	3.5941	3.57651	3.17993	3.32521	3.42182	3.84056	3.10389	3.05552	3.53658
ENSMUSG00000037325	Bbs7	4.4941	4.20013	4.47312	5.10446	4.76681	5.0026	4.35058	4.43086	3.73896
ENSMUSG00000035919	Bbs9	7.67332	7.54158	7.86288	8.06021	7.84742	7.8938	7.26225	7.53401	7.48964
ENSMUSG00000022641	Bbx	9.24085	9.4951	9.16963	9.79068	9.73711	9.70594	10.1139	10.3324	10.4403
ENSMUSG00000097022	BC001981	2.04838	2.42508	2.46627	3.47422	3.16766	2.81335	2.55068	2.28508	2.95023
ENSMUSG00000060149	BC002059	4.33032	3.9126	4.43217	4.27434	4.02971	4.6334	3.76268	3.6761	4.66957
ENSMUSG00000081824	BC002163	4.83022	4.68464	4.95631	5.43115	5.293	5.09519	5.21389	5.07919	5.73635
ENSMUSG00000006010	BC003331	7.83409	8.00281	7.67637	7.54741	7.53213	7.69101	8.27884	8.19031	8.63871
ENSMUSG00000067722	BC003965	5.92397	5.68222	5.82908	5.8577	5.70966	5.94694	6.51835	6.33024	6.58
ENSMUSG00000052712	BC004004	8.76029	8.71193	8.69123	8.64238	8.56833	8.65163	8.88272	8.86766	9.10374
ENSMUSG00000019132	BC005537	11.8375	11.958	11.8948	11.5672	11.4919	11.4945	12.4241	13.0114	12.668
ENSMUSG00000079065	BC005561	6.41196	5.93338	6.38222	6.82178	6.79826	6.55243	6.40995	6.49762	6.87723
ENSMUSG00000026851	BC005624	8.51815	8.92107	8.46939	8.34751	8.37522	8.15194	9.35729	9.23362	9.45916
ENSMUSG00000035835	BC005764	6.21881	5.4942	6.19527	7.1619	7.14496	7.16784	7.33549	7.09633	7.64063
ENSMUSG00000041674	BC006965	4.47201	4.6974	4.4737	4.79383	4.93931	5.61428	4.26072	3.94342	4.44797
ENSMUSG00000078161	BC007180	4.56729	4.87146	4.92683	4.94628	4.86275	4.76487	4.5852	4.31276	4.05329
ENSMUSG00000033799	BC016423	7.6876	7.56938	7.74926	7.53495	7.77009	7.55426	7.65682	7.93295	8.2228
ENSMUSG00000070794	BC016548	2.32705	2.69326	2.30491	2.70072	2.6319	2.52745	2.38592	2.2293	1.9383
ENSMUSG00000033187	BC016579	3.19088	3.48532	3.64063	3.91546	2.54943	3.31268	3.21027	3.10527	2.53087
ENSMUSG00000030780	BC017158	5.22183	4.97213	5.56448	5.48085	5.30584	5.6707	5.183	4.97648	5.49292
ENSMUSG00000039294	BC017643	9.71148	10.0457	9.56799	9.74584	9.84277	9.67852	11.0417	11.1316	11.2798
ENSMUSG00000040563	BC018242	4.59387	4.63914	4.46222	5.57836	5.73194	5.54268	4.18559	4.49702	4.51829
ENSMUSG00000056032	BC018473	10.7456	12.2277	10.8278	14.7297	14.68	14.808	14.0186	14.6228	14.8639
ENSMUSG00000034525	BC018507	10.0503	10.3275	10.0619	9.65256	9.60855	9.62717	11.027	11.2624	11.0288
ENSMUSG00000058216	BC021614	4.80161	4.86188	4.84662	6.12396	6.21051	6.15984	6.06101	6.11114	5.80866
ENSMUSG00000085006	BC021767	2.29081	2.16473	2.56594	2.11305	2.0688	2.30589	2.49719	2.21557	2.06862
ENSMUSG00000038528	BC021785	5.56898	5.79185	5.76872	6.04892	5.57196	5.562	5.16202	5.3379	5.32689
ENSMUSG00000031853	BC021891	3.7231	3.66904	3.7802	3.77759	3.60489	3.94244	3.51774	3.22433	3.13569
ENSMUSG00000037594	BC022687	3.30701	3.33984	3.45533	3.35369	3.60611	3.26611	3.20051	3.78387	3.77681
ENSMUSG00000081137	BC022960	4.44097	3.98902	4.31405	4.59858	4.31652	4.24949	4.34513	3.82855	4.32274
ENSMUSG00000063388	BC023105	2.01079	2.02657	2.20998	1.87731	1.69938	1.83438	2.05868	1.80976	1.94742
ENSMUSG00000092365	BC023719	2.79312	2.85833	2.71013	2.66547	2.70995	3.26165	2.19301	2.5758	2.35121
ENSMUSG00000073139	BC023829	5.7353	5.47593	5.34434	5.70934	5.11858	5.42161	5.9587	6.10956	6.16424
ENSMUSG00000044361	BC024139	3.85675	4.20375	4.01284	3.44617	3.79133	3.85631	3.96396	3.39712	3.84791
ENSMUSG00000086150	BC024582	4.03281	4.02788	3.53311	5.10862	5.05585	4.74402	5.4375	5.23886	5.37799
ENSMUSG00000078786	BC024978	4.4893	4.56073	4.39328	4.63537	4.46152	4.21237	4.3863	4.53796	4.74627
ENSMUSG00000047728	BC025446	3.21548	3.70167	3.28615	3.4622	3.75729	3.37098	3.46184	3.60218	3.45115
ENSMUSG00000074862	BC025920	5.67782	5.42621	5.61467	5.22038	5.39751	5.75284	5.5675	5.53392	5.58984
ENSMUSG00000033488	BC026585	4.76238	4.1711	4.66155	4.31763	4.20578	4.31941	4.23716	3.50919	4.45749
ENSMUSG00000038827	BC026590	5.8046	5.8523	6.05598	6.07351	6.34489	6.08339	5.96961	6.31959	6.59489
ENSMUSG00000044375	BC027072	3.49489	3.54976	3.80549	3.82973	3.50072	4.03704	3.17335	3.46983	3.11244
ENSMUSG00000036208	BC027231	7.45611	7.53297	7.44237	6.3776	6.1463	6.48751	8.05843	8.0748	8.02005
ENSMUSG00000091115	BC027582	3.90254	3.70515	4.10579	3.26318	3.47861	3.06811	3.76358	4.02034	3.78277
ENSMUSG00000075529	BC028471	4.7968	4.60106	4.7111	4.9415	4.15882	5.11264	4.13569	4.31076	3.88009
ENSMUSG00000038543	BC028528	5.97129	5.03571	5.72156	6.19403	6.60859	6.29899	5.32928	5.10285	5.64136
ENSMUSG00000085185	BC028777	3.46154	3.41748	3.62838	3.49949	3.41204	2.9147	3.23455	3.5027	3.40406
ENSMUSG00000047617	BC029214	8.45137	8.57301	8.38321	8.21169	8.33327	8.10873	8.49604	8.42585	8.60299
ENSMUSG00000074649	BC029722	5.98796	5.39783	5.98798	6.18027	5.85424	6.08693	5.83287	5.71711	6.24635
ENSMUSG00000044937	BC030307	4.45696	4.36621	4.20923	4.18887	4.54881	4.72447	4.1594	3.95572	4.20226
ENSMUSG00000046096	BC030336	7.29708	7.13852	7.30194	7.18523	7.20726	7.28545	7.39063	7.61076	7.74334
ENSMUSG00000044726	BC030476	3.51591	3.21278	3.2111	2.92628	3.48046	3.60926	2.39637	2.8894	2.57759
ENSMUSG00000037593	BC030499	5.82379	5.59898	5.36234	5.57389	5.49877	5.6988	5.71653	5.25359	5.26227
ENSMUSG00000049946	BC030500	2.78125	2.54947	2.51954	2.85059	2.36225	2.47421	2.51561	2.28173	2.11531
ENSMUSG00000034773	BC030867	4.62635	4.16166	4.96919	4.19271	3.78643	3.69453	4.1451	4.09466	3.74896
ENSMUSG00000074300	BC030870	1.9319	2.09399	1.78344	2.12296	2.17741	2.06563	1.87774	1.68858	1.59879
ENSMUSG00000036299	BC031181	8.09323	8.00721	7.97653	8.23501	8.24364	8.07908	8.41895	8.32845	8.79266
ENSMUSG00000092349	BC033916	1.20898	1.35559	1.1841	1.18899	1.54793	1.30138	1.37976	1.07782	1.21959
ENSMUSG00000033722	BC034090	4.22788	3.91996	3.98808	4.08709	4.23646	4.10797	4.02756	3.86872	4.24803
ENSMUSG00000017914	BC034902	2.19219	2.35845	2.18121	2.2581	1.95839	2.30619	1.90793	2.19776	1.59472
ENSMUSG00000090164	BC035044	5.07051	4.89074	5.38904	4.67792	5.41367	4.86404	5.33856	4.82548	5.45858
ENSMUSG00000090486	BC035947	2.76818	2.95538	2.79127	3.33131	3.07461	3.58688	2.52737	2.812	2.7007
ENSMUSG00000087221	BC037032	5.02327	4.8117	4.64823	4.54917	4.96826	4.42422	4.67411	4.68302	4.71967
ENSMUSG00000091964	BC037034	11.1365	11.0732	10.9989	9.0505	9.07093	8.94851	10.461	10.4003	10.2771
ENSMUSG00000036948	BC037034	11.1374	11.0743	11.0011	9.05065	9.07108	8.9525	10.4619	10.4038	10.2793
ENSMUSG00000087594	BC039771	4.07531	4.29134	4.6291	4.57399	4.55498	4.4978	4.02679	3.47145	3.69842
ENSMUSG00000086272	BC039966	3.04101	3.22808	3.17757	3.04358	3.38027	2.8634	2.42101	2.72039	2.49066
ENSMUSG00000099168	BC040587	-1.48197	-1.55588	-1.55246	-1.52642	-1.53209	-1.53249	-1.38177	-1.55094	-1.5463
ENSMUSG00000087366	BC042782	6.21772	7.41104	6.36057	7.88094	7.80242	7.77436	10.2409	10.507	10.2286
ENSMUSG00000056418	BC043934	3.9906	4.41964	3.99053	3.62512	4.00244	4.18027	3.68367	4.10798	3.74215
ENSMUSG00000086662	BC046251	4.24955	4.55656	4.21674	4.41141	4.56076	4.40077	4.32779	3.68693	3.5627
ENSMUSG00000085274	BC046401	3.391	2.91661	4.38824	2.83033	2.99201	3.43588	2.71383	2.91198	2.7013
ENSMUSG00000053684	BC048403	8.27415	8.25248	8.40108	5.83995	5.96793	5.98512	7.12181	7.27213	7.65175
ENSMUSG00000053508	BC048502	1.78143	1.94081	1.70597	2.25851	1.7417	1.73895	1.97302	1.71789	1.51997
ENSMUSG00000064063	BC048507	-0.88419	-0.665731	-0.876461	-0.844262	-0.853539	-0.854181	-0.557721	-0.875422	-0.744588
ENSMUSG00000047228	BC048546	4.77471	4.65572	4.50094	4.56026	4.75141	5.20511	4.63275	4.33593	3.90765
ENSMUSG00000050641	BC048562	1.02609	0.937144	0.766261	0.752928	0.575307	0.729728	1.04555	0.534928	0.544733
ENSMUSG00000047733	BC048609	4.80678	5.12709	4.50803	4.65779	4.64663	4.52776	5.06084	5.10558	5.31815
ENSMUSG00000074052	BC048644	3.3519	3.78891	3.29506	3.50779	3.06045	3.15358	3.16555	2.89772	3.0451
ENSMUSG00000049694	BC048671	6.64375	6.53804	6.76492	4.48998	4.89092	4.132	4.30081	4.80222	4.23806
ENSMUSG00000061877	BC048679	2.06041	2.01194	1.96582	1.86215	1.94752	1.94431	1.87557	1.79601	1.83259
ENSMUSG00000091402	BC048943	1.85363	1.9369	1.9719	1.91335	1.44792	1.97979	1.70349	1.90415	1.6436
ENSMUSG00000091996	BC049352	4.66292	5.13764	4.74948	6.11699	6.08107	6.54778	5.84716	6.06918	6.40161
ENSMUSG00000050141	BC049635	3.61659	3.47339	3.63071	3.04695	3.72672	3.43586	3.11737	2.99659	2.5792
ENSMUSG00000068149	BC049702	1.62095	2.21822	1.70886	2.29326	2.33556	2.51634	1.58615	2.11953	1.48666
ENSMUSG00000047515	BC049715	2.64419	2.3647	2.40423	2.61105	2.32294	2.64154	2.75047	2.24481	1.95565
ENSMUSG00000045587	BC049730	2.83328	2.55647	2.52689	2.54611	2.48656	2.48245	2.59611	2.29128	2.23691
ENSMUSG00000045942	BC049762	2.14545	1.95535	1.8047	1.73934	1.7063	1.96785	2.14407	1.81676	2.29316
ENSMUSG00000092131	BC050972	4.36245	3.97212	4.35003	3.72057	4.2537	4.24591	3.89657	3.4642	3.61501
ENSMUSG00000031022	BC051019	3.40506	3.44717	3.8535	4.03668	3.506	3.7292	3.38209	3.34811	3.35487
ENSMUSG00000027902	BC051070	3.04513	3.17908	3.28989	3.10708	3.44079	3.11777	2.57885	2.69281	2.84053
ENSMUSG00000055961	BC051076	3.57979	4.01005	4.03846	4.47974	4.14696	4.25166	3.51514	3.67042	3.16484
ENSMUSG00000097163	BC051077	2.68457	3.16305	3.27118	3.21661	2.95559	2.50498	2.91189	2.62456	2.85373
ENSMUSG00000057246	BC051142	6.21265	6.25013	6.41989	5.27044	5.40428	5.1651	5.2109	5.23144	4.90531
ENSMUSG00000092564	BC051226	2.78636	3.03582	2.95734	3.26426	3.26285	3.4067	2.95265	2.3606	2.81058
ENSMUSG00000098197	BC051537	3.45144	3.33014	3.61282	3.82774	3.50314	3.6529	3.6071	3.53085	3.48937
ENSMUSG00000047841	BC051628	2.80758	2.75869	2.74093	2.224	2.4448	3.09783	2.59259	2.69093	2.19313
ENSMUSG00000042243	BC051665	2.69718	3.10571	2.71619	2.96836	2.8953	2.79167	2.71203	3.01247	2.42785
ENSMUSG00000040282	BC052040	5.08174	4.90368	5.35596	4.81943	4.79288	4.52353	4.71167	4.65114	4.79469
ENSMUSG00000087035	BC052486	2.97385	2.91693	3.2727	3.18404	3.19112	3.41659	3.02983	2.4797	2.53073
ENSMUSG00000046974	BC053393	3.59196	3.2925	3.57809	3.6376	3.82853	3.82152	3.34413	3.16932	3.07895
ENSMUSG00000036864	BC053749	4.6942	4.83945	4.8925	5.35454	5.28867	4.92954	5.1051	5.31707	4.73286
ENSMUSG00000054362	BC055111	3.49771	3.4624	3.67056	3.65594	3.22446	3.76247	3.3501	2.77575	2.93151
ENSMUSG00000041406	BC055324	7.37276	7.35815	7.37176	7.05551	7.07132	6.85094	7.94276	8.0102	7.8774
ENSMUSG00000059355	BC056474	5.51338	5.79371	5.56518	4.96933	5.1545	5.22324	5.23374	5.12371	5.32128
ENSMUSG00000037708	BC061194	4.04684	3.97669	3.68221	4.11282	3.94363	3.65291	3.56632	3.47774	2.89647
ENSMUSG00000096153	BC061195	-2.15911	-2.15541	-2.11597	-2.14235	-2.14486	-2.14504	-2.15404	-2.15323	-2.15117
ENSMUSG00000072822	BC061212	0	0	0	0	0	0	0	0	0
ENSMUSG00000072145	BC061237	2.46839	2.26957	2.39682	3.0011	2.74479	3.06658	2.10831	2.01381	1.78704
ENSMUSG00000087150	BC064078	4.83825	4.87262	4.85796	6.6515	7.06303	6.97433	5.27351	5.37312	6.05047
ENSMUSG00000072960	BC065397	2.86037	2.86628	2.77821	3.05436	2.78325	3.28982	2.3427	2.87091	2.29716
ENSMUSG00000087368	BC065397	3.89261	3.74185	3.6058	3.88194	3.55354	3.97116	3.54442	3.45644	3.24707
ENSMUSG00000097211	BC065403	4.19006	3.87098	4.282	3.90368	3.87637	3.55956	3.57367	3.87399	3.49232
ENSMUSG00000021763	BC067074	4.78095	4.90868	4.88607	4.62663	4.39108	4.75015	4.67216	4.46666	4.04094
ENSMUSG00000064125	BC068157	5.01518	5.18056	5.02627	4.88567	5.14304	5.33958	4.5087	4.58926	4.34458
ENSMUSG00000051721	BC068281	5.23873	5.50138	5.18804	5.86449	5.274	5.84464	6.34214	6.4384	6.54553
ENSMUSG00000070618	BC080695	1.10799	1.43579	1.27987	1.46755	1.15326	1.54103	1.37404	1.06632	0.951308
ENSMUSG00000097856	BC080695	0	0	0	0	0	0	0	0	0
ENSMUSG00000046750	BC089491	3.37184	3.15562	3.71144	3.30667	3.22454	3.12707	3.14135	2.78794	3.02044
ENSMUSG00000074639	BC089597	2.78407	2.47948	3.07349	2.82899	2.65398	3.11404	2.67888	2.62246	2.5914
ENSMUSG00000070501	BC094916	3.22551	3.9168	4.23111	4.16945	3.99656	3.69237	4.06612	4.26297	4.06158
ENSMUSG00000018752	BC096441	5.24959	4.92514	5.00856	4.5551	4.23422	4.54688	5.55919	5.07226	5.15922
ENSMUSG00000076433	BC100451	7.89532	7.76472	8.23599	7.10696	7.01101	7.25238	6.14228	6.94167	6.32678
ENSMUSG00000071561	BC100530	9.11925	9.15548	8.84378	10.4755	10.5337	10.494	10.4397	10.4647	11.3509
ENSMUSG00000045231	BC106179	4.06354	3.34984	3.98225	4.06805	3.51457	3.82252	3.8436	3.72956	3.36821
ENSMUSG00000046317	BC107364	2.59147	2.64224	2.68902	2.88044	2.89335	2.60687	2.37369	2.09225	2.00919
ENSMUSG00000079594	BC117090	5.19368	5.68852	4.80044	6.28906	6.76159	6.29441	6.65396	6.82751	7.41126
ENSMUSG00000094796	BC147527	2.31759	2.29555	2.01731	2.14339	2.41145	1.96639	2.10234	1.93522	1.86542
ENSMUSG00000002980	Bcam	4.20476	4.26112	3.94634	4.19118	3.65349	4.3502	3.68952	3.4097	3.06655
ENSMUSG00000004892	Bcan	3.61349	3.52895	3.88191	4.00406	3.83525	3.53006	3.73871	3.50231	2.96189
ENSMUSG00000020650	Bcap29	4.77781	4.51433	4.98491	4.82838	5.03066	4.93541	5.18464	5.38867	5.6868
ENSMUSG00000002015	Bcap31	8.65725	8.70401	8.3851	9.26998	9.15003	9.13182	8.90183	8.86982	9.44619
ENSMUSG00000031955	Bcar1	3.69052	3.89208	3.69025	4.06148	3.53127	3.34816	3.27353	3.43616	3.57872
ENSMUSG00000028121	Bcar3	6.5603	6.42382	6.42555	5.7043	5.49193	5.04382	5.69823	5.25111	5.47772
ENSMUSG00000013523	Bcas1	4.75262	4.6926	4.74265	4.41149	4.09425	4.7629	4.47266	4.47626	4.32609
ENSMUSG00000005687	Bcas2	6.85374	6.65065	6.8657	7.56891	7.17902	7.17919	7.18257	7.17715	7.65367
ENSMUSG00000059439	Bcas3	8.74356	8.57207	8.72447	8.43268	8.36929	8.52151	8.96005	9.38646	9.05904
ENSMUSG00000030268	Bcat1	5.48509	5.17475	5.49691	5.37497	5.08111	5.02971	5.18037	5.17529	4.85986
ENSMUSG00000030826	Bcat2	6.20803	5.1672	6.26351	5.51553	5.88971	5.59999	5.27318	5.39552	6.2644
ENSMUSG00000030983	Bccip	5.59781	5.51684	5.78151	5.11684	5.47975	5.91422	6.33578	6.30183	6.9376
ENSMUSG00000037525	Bcdin3d	5.89671	5.82569	5.68314	5.65528	5.47925	5.32952	5.26949	5.34132	5.78953
ENSMUSG00000027792	Bche	3.16649	3.89303	3.69842	4.01978	3.78553	3.77855	3.5369	3.10485	2.68888
ENSMUSG00000060376	Bckdha	7.80864	7.80272	7.53982	7.08603	7.41033	7.11483	8.11633	7.9464	8.12564
ENSMUSG00000032263	Bckdhb	3.94121	3.74638	3.96185	4.18149	3.93523	4.13146	4.39986	4.29486	4.60453
ENSMUSG00000030802	Bckdk	6.83331	6.43335	6.69674	6.38692	6.01954	6.0832	6.58629	6.50533	6.91176
ENSMUSG00000028191	Bcl10	11.0144	11.3769	10.8589	10.866	10.7712	10.7484	11.9307	11.821	12.066
ENSMUSG00000000861	Bcl11a	7.85465	7.17737	7.98058	6.89316	6.50712	6.75165	6.15848	6.7976	6.46054
ENSMUSG00000048251	Bcl11b	4.67679	4.85273	5.38557	6.01434	5.74828	5.39994	4.66694	4.51496	4.44041
ENSMUSG00000057329	Bcl2	6.00817	5.47397	5.74827	6.06918	6.43309	6.31098	6.4209	6.13849	6.3104
ENSMUSG00000093809	Bcl2a1a	2.6351	3.57592	2.91711	4.68162	4.5088	4.5003	4.27415	4.14802	5.28145
ENSMUSG00000089929	Bcl2a1b	4.21568	5.01498	4.20173	6.10065	6.32106	6.096	5.65038	5.75526	6.60792
ENSMUSG00000053820	Bcl2a1c	-0.656996	-0.649132	-0.516995	-0.447217	-0.460926	-0.462024	-0.646117	-0.64432	-0.374943
ENSMUSG00000096581	Bcl2a1d	2.64893	3.02356	2.71045	3.96481	3.86014	3.91673	3.83895	3.51582	4.25211
ENSMUSG00000007659	Bcl2l1	8.17693	8.52538	8.2764	10.0191	10.0184	9.98014	11.2343	11.6434	11.34
ENSMUSG00000032191	Bcl2l10	1.1852	1.4299	1.36024	1.79288	1.07753	1.37739	1.25239	1.6462	1.16766
ENSMUSG00000027381	Bcl2l11	9.2164	9.78793	9.17608	11.2852	11.2991	11.2805	11.9397	12.3577	12.1963
ENSMUSG00000003190	Bcl2l12	5.70983	5.60926	5.79768	6.72451	6.53376	6.50606	6.02529	6.2634	6.3795
ENSMUSG00000009112	Bcl2l13	9.52191	9.64047	9.4965	9.46718	9.51918	9.45732	9.65948	9.94455	9.65329
ENSMUSG00000030200	Bcl2l14	4.51718	4.70964	4.60661	4.6358	4.56831	4.55996	4.3068	4.12116	4.40462
ENSMUSG00000044165	Bcl2l15	4.85795	4.64274	4.65795	4.45837	4.67562	4.33484	4.71452	4.75695	4.73113
ENSMUSG00000089682	Bcl2l2	6.25295	5.87595	6.22972	5.86472	5.8042	6.16244	5.77234	6.24514	6.45267
ENSMUSG00000053175	Bcl3	7.43807	8.21009	7.47259	9.76287	9.79025	9.78981	9.79975	10.4308	10.0591
ENSMUSG00000022508	Bcl6	11.8298	12.1864	11.7721	12.0396	12.0588	12.1298	12.8864	13.2141	13.0692
ENSMUSG00000000317	Bcl6b	3.96248	4.01659	3.8549	4.53133	3.94317	4.35571	4.03708	3.83215	3.39325
ENSMUSG00000029438	Bcl7a	5.63271	5.73155	5.91835	5.65595	5.2638	6.01047	5.3892	5.50374	5.18582
ENSMUSG00000029681	Bcl7b	7.11382	7.06849	7.04503	5.93363	5.95458	6.0968	6.7105	6.39561	6.87706
ENSMUSG00000030814	Bcl7c	5.52958	5.41493	5.48306	5.31067	5.13325	5.41988	5.38978	5.27248	5.57853
ENSMUSG00000038256	Bcl9	7.19854	7.21982	7.57222	8.12464	7.85575	7.95723	7.51025	8.21215	7.57841
ENSMUSG00000063382	Bcl9l	5.63515	4.94294	5.79054	6.27982	6.41392	6.40319	5.22316	6.05699	5.01955
ENSMUSG00000037608	Bclaf1	10.5011	10.5883	10.4814	9.92164	9.92458	9.84987	10.9691	11.0293	11.4451
ENSMUSG00000031845	Bcmo1	3.74343	4.10717	3.88619	4.04271	4.06649	4.33353	3.49976	3.65393	3.15033
ENSMUSG00000032066	Bco2	4.37983	4.14836	4.14574	3.74175	3.8764	3.36776	3.50801	3.54027	3.91322
ENSMUSG00000040363	Bcor	8.68693	8.95768	8.5813	9.22052	9.19565	9.19884	9.85459	10.2476	9.8253
ENSMUSG00000036959	Bcorl1	8.92313	8.59934	9.20571	9.54246	9.53165	9.4053	8.15832	9.12195	8.16957
ENSMUSG00000009681	Bcr	9.00859	9.21362	9.04183	7.68243	7.94797	7.68944	8.41109	8.64072	7.82431
ENSMUSG00000026172	Bcs1l	7.12681	6.90524	6.92511	6.65056	6.7661	6.11458	5.64982	5.85944	5.71531
ENSMUSG00000046598	Bdh1	4.25749	3.82751	3.80092	3.5097	3.82795	3.67341	3.74578	3.49829	3.57883
ENSMUSG00000028167	Bdh2	3.18738	3.38048	3.76882	3.54207	3.28495	3.36516	3.05836	3.22535	2.99345
ENSMUSG00000041347	Bdkrb1	2.36108	2.46071	2.57592	2.51952	2.21868	2.45614	2.49847	2.91045	2.21076
ENSMUSG00000021070	Bdkrb2	1.41759	1.81464	1.85128	1.56558	1.77634	1.65497	1.39518	1.28931	1.17685
[truncated: 37,153 more rows]

## Sheet: VOLCANO
Geneid	GeneSymbol	LOGFC	MINUSLOG10P
ENSMUSG00000032494	Tdgf1	-0.284639	3.96455
ENSMUSG00000043421	Hilpda	-0.27772	5.01983
ENSMUSG00000029005	Draxin	-0.243784	6.00199
ENSMUSG00000029379	Cxcl3	-0.237993	3.81748
ENSMUSG00000083316	Gm15185	-0.237131	2.33307
ENSMUSG00000079652	Fam71f2	-0.236326	3.25992
ENSMUSG00000030137	Tuba8	-0.232316	4.21903
ENSMUSG00000035042	Ccl5	-0.222533	3.8807
ENSMUSG00000085822	Gm15584	-0.213869	3.10349
ENSMUSG00000086527	Gm15856	-0.207549	3.7067
ENSMUSG00000048498	Cd300e	-0.207276	3.27596
ENSMUSG00000086665	Gm13067	-0.206499	2.73483
ENSMUSG00000066697	Gm10172	-0.200309	3.67269
ENSMUSG00000038067	Csf3	-0.198022	2.11731
ENSMUSG00000023073	Slc10a2	-0.197099	2.49673
ENSMUSG00000098359	mmu-mir-7649	-0.195852	2.36294
ENSMUSG00000092517	Art2a-ps	-0.195048	3.35439
ENSMUSG00000022582	Ly6g	-0.194798	5.79551
ENSMUSG00000023034	Nr4a1	-0.19241	4.35334
ENSMUSG00000091318	Gm5415	-0.191306	3.17556
ENSMUSG00000019987	Arg1	-0.190821	2.20357
ENSMUSG00000078984	Gm11027	-0.188631	2.17207
ENSMUSG00000081635	Gm15071	-0.188114	2.97087
ENSMUSG00000029084	Cd38	-0.186766	3.16225
ENSMUSG00000085522	4930556G01Rik	-0.186527	2.0767
ENSMUSG00000072949	Acot1	-0.186151	4.02235
ENSMUSG00000051956	Rnf133	-0.185264	2.53251
ENSMUSG00000073077	Gm7173	-0.185249	2.39993
ENSMUSG00000051414	Olfr829	-0.18467	2.9785
ENSMUSG00000058186	Gm13242	-0.184114	2.7984
ENSMUSG00000003053	Cyp2c29	-0.183849	2.12498
ENSMUSG00000056222	Spock1	-0.182561	3.35637
ENSMUSG00000058281	Gm10038	-0.182186	2.09637
ENSMUSG00000078591	Hs3st4	-0.181986	3.39523
ENSMUSG00000060780	Lrrtm1	-0.181773	2.09031
ENSMUSG00000019577	Pdk4	-0.180589	3.20704
ENSMUSG00000032915	Emr4	-0.180452	3.39281
ENSMUSG00000061388	Csn1s2b	-0.179666	3.35521
ENSMUSG00000085786	Gm15987	-0.179617	2.5816
ENSMUSG00000083215	Gm14081	-0.179077	2.26287
ENSMUSG00000051616	C230029F24Rik	-0.178075	2.36538
ENSMUSG00000090927	Gm17047	-0.177999	2.72787
ENSMUSG00000026471	Mr1	-0.177953	4.00112
ENSMUSG00000002633	Shh	-0.177493	1.72968
ENSMUSG00000026023	Cdk15	-0.17667	3.24812
ENSMUSG00000024912	Fosl1	-0.176587	2.1523
ENSMUSG00000040564	Apoc1	-0.175232	2.78855
ENSMUSG00000036185	Sapcd1	-0.175204	3.42664
ENSMUSG00000072145	BC061237	-0.173572	2.67577
ENSMUSG00000036231	Agr3	-0.1728	2.3305
ENSMUSG00000082977	Gm11911	-0.172351	1.78766
ENSMUSG00000026390	Marco	-0.171242	1.57355
ENSMUSG00000086739	Gm4409	-0.171213	3.5166
ENSMUSG00000087301	Gm13629	-0.171059	2.36214
ENSMUSG00000096864	Gm21978	-0.170433	2.49085
ENSMUSG00000095882	Gm10764	-0.17001	2.34134
ENSMUSG00000097661	Gm26763	-0.169582	2.53676
ENSMUSG00000080974	Gm9009	-0.169206	2.32028
ENSMUSG00000060559	Gm10083	-0.168948	2.86668
ENSMUSG00000097547	B230110C06Rik	-0.168562	1.95122
ENSMUSG00000084393	Gm14101	-0.166656	2.1865
ENSMUSG00000093426	Vmn2r-ps123	-0.16612	3.17436
ENSMUSG00000095696	Olfr786	-0.165812	1.89081
ENSMUSG00000059203	Il1rapl2	-0.165148	2.99217
ENSMUSG00000071311	Gpr31b	-0.164273	1.93477
ENSMUSG00000054417	Cyp3a44	-0.164142	2.18067
ENSMUSG00000041741	Pde3a	-0.163674	2.81785
ENSMUSG00000064137	Rhox8	-0.16361	2.20783
ENSMUSG00000081307	Gm13627	-0.16336	1.74002
ENSMUSG00000079183	C030005K15Rik	-0.163292	1.466
ENSMUSG00000051153	Tas2r105	-0.163279	1.66156
ENSMUSG00000046845	Il1f10	-0.162327	2.84925
ENSMUSG00000045930	Clec14a	-0.161707	2.93303
ENSMUSG00000029669	Tspan12	-0.161427	2.4165
ENSMUSG00000043066	Vmn1r66	-0.161205	3.07721
ENSMUSG00000009580	Odam	-0.160805	2.29425
ENSMUSG00000047324	4931429P17Rik	-0.160416	2.44144
ENSMUSG00000086732	Gm6117	-0.160378	1.54746
ENSMUSG00000080703	Gm13183	-0.160325	2.27829
ENSMUSG00000086410	Gm16158	-0.160196	1.45687
ENSMUSG00000093980	Olfr493	-0.160112	2.11982
ENSMUSG00000092201	A530058N18Rik	-0.159721	1.6828
ENSMUSG00000087503	Gm11459	-0.159496	2.14928
ENSMUSG00000087627	A230059L01Rik	-0.159363	2.8554
ENSMUSG00000074959	Olfr1295	-0.15934	1.44016
ENSMUSG00000057116	AF366264	-0.159293	3.54428
ENSMUSG00000042525	4933428M09Rik	-0.159	2.70442
ENSMUSG00000068154	Insm1	-0.158721	1.98932
ENSMUSG00000086707	Gm12088	-0.158316	2.0985
ENSMUSG00000083937	Cct3-ps1	-0.158265	2.87912
ENSMUSG00000072584	Gm7489	-0.15795	1.90947
ENSMUSG00000052726	Kcnt2	-0.157943	2.4513
ENSMUSG00000074292	Gm10660	-0.157517	2.5684
ENSMUSG00000062551	Prl2c1	-0.157328	2.36877
ENSMUSG00000096062	Pik3c2g	-0.157169	2.33367
ENSMUSG00000081659	Gm14917	-0.157034	3.23132
ENSMUSG00000075095	Olfr1229	-0.156983	2.00566
ENSMUSG00000097401	Gm26744	-0.156655	2.59307
ENSMUSG00000092276	1700116B05Rik	-0.156619	2.7101
ENSMUSG00000044912	Syt16	-0.15641	2.92256
ENSMUSG00000040093	Bmf	-0.156133	4.43526
ENSMUSG00000027890	Gstm4	-0.154879	3.86828
ENSMUSG00000098071	Gm26996	-0.154825	2.16474
ENSMUSG00000063452	Olfr800	-0.154324	1.44461
ENSMUSG00000031443	F7	-0.153825	3.26096
ENSMUSG00000081517	Gm16204	-0.15379	3.72434
ENSMUSG00000000248	Clec2g	-0.153663	5.05376
ENSMUSG00000094672	Vmn2r25	-0.153599	2.30121
ENSMUSG00000093814	Gm9637	-0.153189	2.57001
ENSMUSG00000087040	Gm14033	-0.152898	1.5873
ENSMUSG00000086375	Gm12127	-0.152772	1.52192
ENSMUSG00000090362	Vmn2r79	-0.152648	2.62494
ENSMUSG00000090699	Gm9071	-0.152485	2.45785
ENSMUSG00000081069	Gm13928	-0.152325	2.8395
ENSMUSG00000035653	Lrfn5	-0.152159	2.12256
ENSMUSG00000046699	Slitrk4	-0.152078	2.62086
ENSMUSG00000087170	1700001G01Rik	-0.151836	3.48512
ENSMUSG00000074346	1700095B22Rik	-0.151718	2.1492
ENSMUSG00000083954	Gm12179	-0.151615	1.84119
ENSMUSG00000074607	Tox2	-0.151475	3.53451
ENSMUSG00000075144	Olfr1156	-0.151316	3.38519
ENSMUSG00000054568	Usp17la	-0.151196	2.75754
ENSMUSG00000094849	Vmn2r-ps18	-0.15119	1.65538
ENSMUSG00000088894	Gm22520	-0.151176	2.63752
ENSMUSG00000091176	Gm17678	-0.149695	2.84058
ENSMUSG00000043060	Fscb	-0.149605	2.38581
ENSMUSG00000074664	A830092H15Rik	-0.149017	2.36523
ENSMUSG00000069925	4932416K20Rik	-0.149017	2.42103
ENSMUSG00000027416	Otor	-0.148898	1.8857
ENSMUSG00000086737	Gm13763	-0.148856	2.26752
ENSMUSG00000052865	Gm13619	-0.148738	3.31954
ENSMUSG00000085318	Gm12524	-0.148687	1.70033
ENSMUSG00000091304	Speer6-ps1	-0.148398	2.59574
ENSMUSG00000092008	Cyp2c69	-0.147927	2.13916
ENSMUSG00000063764	Olfr508	-0.147874	2.93159
ENSMUSG00000097788	Gm16596	-0.147723	2.9488
ENSMUSG00000062209	Erbb4	-0.147563	2.56652
ENSMUSG00000055942	Gm4745	-0.147553	1.99133
ENSMUSG00000050251	Olfr809	-0.147283	2.36248
ENSMUSG00000087358	4930453H23Rik	-0.147256	1.60405
ENSMUSG00000023289	Sva	-0.147225	1.98434
ENSMUSG00000050870	Mrgprb8	-0.147202	1.65489
ENSMUSG00000096999	Gm26793	-0.146689	2.72813
ENSMUSG00000053287	Olfr1013	-0.146666	1.66893
ENSMUSG00000066688	Gm13083	-0.146653	1.41478
ENSMUSG00000075221	Olfr992	-0.146352	2.46836
ENSMUSG00000092459	Gm2302	-0.146265	1.56982
ENSMUSG00000092609	Gm20481	-0.146247	1.58192
ENSMUSG00000073764	Gm12888	-0.146228	1.38839
ENSMUSG00000091504	Vmn2r118	-0.146216	2.71407
ENSMUSG00000084222	Gm13973	-0.146186	2.16062
ENSMUSG00000034031	1700106J16Rik	-0.146183	1.34439
ENSMUSG00000056332	Gm16294	-0.145922	2.39943
ENSMUSG00000056648	Hoxb8	-0.145731	2.10479
ENSMUSG00000087632	Gm6058	-0.145699	1.69621
ENSMUSG00000098212	Gm20997	-0.145698	1.7516
ENSMUSG00000087402	Gm11867	-0.145438	1.8285
ENSMUSG00000064252	Olfr329-ps	-0.145384	2.24629
ENSMUSG00000048173	Olfr1324	-0.145314	1.97277
ENSMUSG00000060673	4930595M18Rik	-0.145184	1.94922
ENSMUSG00000075044	Slc22a29	-0.144986	1.98685
ENSMUSG00000055679	Ctsr	-0.144973	2.26368
ENSMUSG00000027965	Olfm3	-0.144772	2.57834
ENSMUSG00000093760	Gm20678	-0.144599	2.37127
ENSMUSG00000082499	Gm13615	-0.144553	2.38723
ENSMUSG00000070873	Lilra5	-0.144511	2.45673
ENSMUSG00000083666	Gm12358	-0.144503	1.33161
ENSMUSG00000066007	Zfp600	-0.144259	1.4839
ENSMUSG00000080997	Gm11885	-0.144205	2.74064
ENSMUSG00000098025	Gm27013	-0.144185	3.01832
ENSMUSG00000086275	1700121C08Rik	-0.144115	1.51987
ENSMUSG00000026700	Tnfsf4	-0.143959	1.81648
ENSMUSG00000093581	Gm18006	-0.143938	2.23419
ENSMUSG00000024134	Six2	-0.143886	3.01887
ENSMUSG00000041698	Slco1a1	-0.143527	2.23492
ENSMUSG00000029490	Mfsd7a	-0.143487	2.75876
ENSMUSG00000096919	Gm26775	-0.143322	1.42776
ENSMUSG00000084377	Gm15302	-0.143228	2.00185
ENSMUSG00000059645	Gm7361	-0.143185	2.91674
ENSMUSG00000097068	Gm26760	-0.14314	2.74497
ENSMUSG00000070796	Psg21	-0.142677	1.37702
ENSMUSG00000087346	Gm5699	-0.142539	2.36904
ENSMUSG00000078582	Hivep3	-0.142228	2.92664
ENSMUSG00000086689	Gm16876	-0.142131	3.15064
ENSMUSG00000031294	D630029K05Rik	-0.141962	1.90971
ENSMUSG00000047163	Olfr65	-0.141892	2.40328
ENSMUSG00000082852	Gm12021	-0.141741	1.70171
ENSMUSG00000073601	Serpinb3c	-0.141539	2.11027
ENSMUSG00000048764	Tmprss11f	-0.141272	2.18912
ENSMUSG00000081471	Gm14735	-0.141233	2.182
ENSMUSG00000095384	1700001F09Rik	-0.141204	2.74611
ENSMUSG00000091771	Vmn2r103	-0.141196	2.67799
ENSMUSG00000091557	Gm8584	-0.141182	2.41259
ENSMUSG00000094734	Olfr799	-0.140995	2.47421
ENSMUSG00000092094	Zfp804b	-0.140909	3.77786
ENSMUSG00000092400	Gm20469	-0.140775	1.92093
ENSMUSG00000057215	Gm15514	-0.140761	1.6656
ENSMUSG00000086860	Gm1720	-0.140563	2.1488
ENSMUSG00000017652	Cd40	-0.140499	2.42651
ENSMUSG00000053626	Tll1	-0.140465	2.9297
ENSMUSG00000027560	Dok5	-0.140447	2.42024
ENSMUSG00000085479	9430073C21Rik	-0.140344	2.12289
ENSMUSG00000087431	Gm16054	-0.140073	2.10835
ENSMUSG00000084946	Dlx1os	-0.140026	2.07942
ENSMUSG00000092629	Vmn1r-ps85	-0.139983	2.47611
ENSMUSG00000051177	Plcb1	-0.139896	2.58377
ENSMUSG00000056399	Prss34	-0.139782	3.4133
ENSMUSG00000081269	Gm14659	-0.139632	4.57636
ENSMUSG00000048398	Gm5065	-0.139447	2.23216
ENSMUSG00000096440	Vmn2r-ps20	-0.139427	2.71786
ENSMUSG00000098659	RP23-442I7.1	-0.139306	2.10163
ENSMUSG00000020427	Igfbp3	-0.139041	1.67239
ENSMUSG00000073682	Gm10563	-0.138811	1.89657
ENSMUSG00000091481	Gm17154	-0.138673	1.5837
ENSMUSG00000033774	Npbwr1	-0.138673	2.41936
ENSMUSG00000068149	BC049702	-0.138649	1.45311
ENSMUSG00000022762	Ncam2	-0.138405	3.69729
ENSMUSG00000081939	Gm15399	-0.138274	2.65219
ENSMUSG00000045518	Onecut3	-0.138227	2.30744
ENSMUSG00000063240	Olfr133	-0.138195	1.84528
ENSMUSG00000017740	Slc12a5	-0.138103	3.50177
ENSMUSG00000041700	Lhfpl1	-0.137918	1.88596
ENSMUSG00000075166	Olfr1104	-0.137826	3.65855
ENSMUSG00000068151	A230006K03Rik	-0.137794	2.4874
ENSMUSG00000097462	9530026P05Rik	-0.137539	2.86518
ENSMUSG00000018623	Mmp7	-0.137447	1.94542
ENSMUSG00000081964	Gm11873	-0.137215	2.64327
ENSMUSG00000054588	Gbp10	-0.137167	1.32576
ENSMUSG00000091692	4930433I11Rik	-0.137167	2.1226
ENSMUSG00000085412	Gm15055	-0.136882	2.667
ENSMUSG00000062518	Zfp534	-0.136626	2.73687
ENSMUSG00000037482	Erv3	-0.136559	4.0848
ENSMUSG00000097040	2610316D01Rik	-0.136552	2.35201
ENSMUSG00000081560	Gm9218	-0.136458	3.85442
ENSMUSG00000073207	Ccdc160	-0.136414	1.92051
ENSMUSG00000031253	Srpx2	-0.136394	2.31868
ENSMUSG00000090546	Cdr1	-0.136175	1.38809
ENSMUSG00000079058	Adam34	-0.136173	1.58829
ENSMUSG00000081427	Gm12382	-0.136002	2.55867
ENSMUSG00000083898	Gm7340	-0.135908	1.67791
ENSMUSG00000089773	Skint1	-0.135661	2.00805
ENSMUSG00000036437	Npy1r	-0.135547	1.59676
ENSMUSG00000036446	Lum	-0.135072	1.87235
ENSMUSG00000001496	Nkx2-1	-0.135047	2.84065
ENSMUSG00000058670	4932411N23Rik	-0.135007	1.76649
ENSMUSG00000001622	Csn3	-0.134898	2.22181
ENSMUSG00000021226	Acot2	-0.134891	2.73987
ENSMUSG00000025892	Gria4	-0.134845	1.89109
ENSMUSG00000044337	Ackr3	-0.134766	2.10203
ENSMUSG00000096578	Gm9529	-0.134686	2.60137
ENSMUSG00000091929	Gm8582	-0.134423	2.33896
ENSMUSG00000096519	Gm10721	-0.134378	5.10767
ENSMUSG00000063173	Olfr811	-0.134284	2.15294
ENSMUSG00000075100	Olfr1223	-0.134242	1.94675
ENSMUSG00000094832	Gm21846	-0.13404	2.49437
ENSMUSG00000041708	Mpped1	-0.133926	2.21015
ENSMUSG00000045348	Nyap1	-0.133792	3.50653
ENSMUSG00000074620	Gm10731	-0.133408	1.42446
ENSMUSG00000067416	Actl9	-0.133144	1.75265
ENSMUSG00000092519	Actl9	-0.133144	1.75265
ENSMUSG00000031241	Tbx22	-0.133126	2.42604
ENSMUSG00000082046	Gm14464	-0.133081	3.02276
ENSMUSG00000032808	Cyp2c38	-0.133064	2.80605
ENSMUSG00000056910	Vmn2r107	-0.132952	1.94384
ENSMUSG00000039555	Cylc2	-0.132876	3.1079
ENSMUSG00000073976	1700026J12Rik	-0.132871	1.71233
ENSMUSG00000022156	Gzme	-0.132785	1.96852
ENSMUSG00000048391	Olfr843	-0.132648	2.44783
ENSMUSG00000022454	Nell2	-0.132596	3.90069
ENSMUSG00000057400	Ces1c	-0.13245	1.77225
ENSMUSG00000031104	Rab33a	-0.132443	1.52569
ENSMUSG00000019929	Dcn	-0.132236	1.83488
ENSMUSG00000035387	4930415L06Rik	-0.131836	2.75568
ENSMUSG00000097841	4930511A02Rik	-0.131822	2.45425
ENSMUSG00000089871	Speer7-ps1	-0.131791	1.73059
ENSMUSG00000089678	Agxt2	-0.131745	1.72806
ENSMUSG00000033998	Kcnk1	-0.131689	1.69255
ENSMUSG00000047535	Olfr67	-0.131613	2.36206
ENSMUSG00000068082	Grxcr1	-0.131604	1.36069
ENSMUSG00000096984	Gm26523	-0.131571	3.97534
ENSMUSG00000020178	Adora2a	-0.131568	2.1633
ENSMUSG00000027355	Tmco5	-0.131566	1.83264
ENSMUSG00000045871	Slitrk6	-0.131416	3.51187
ENSMUSG00000031293	Rs1	-0.131405	1.85484
ENSMUSG00000045584	Olfr610	-0.13134	1.65711
ENSMUSG00000080773	Gm12955	-0.131319	1.60577
ENSMUSG00000072244	Trim6	-0.131292	4.59838
ENSMUSG00000090722	Gm8378	-0.131283	2.67814
ENSMUSG00000097212	D030062O11Rik	-0.131278	1.84174
ENSMUSG00000043286	Pnpla1	-0.131169	3.42662
ENSMUSG00000081705	Gm12582	-0.131119	2.43915
ENSMUSG00000085468	Gm15343	-0.131115	2.14739
ENSMUSG00000027973	1700006A11Rik	-0.131026	3.44006
ENSMUSG00000095002	Olfr798	-0.130931	3.15346
ENSMUSG00000083818	Gm14908	-0.130875	1.64005
ENSMUSG00000051599	Pcdhb2	-0.130844	1.66694
ENSMUSG00000040726	Hesx1	-0.130803	3.18465
ENSMUSG00000005994	Tyrp1	-0.130663	2.02603
ENSMUSG00000044014	Npy5r	-0.130584	1.87124
ENSMUSG00000047692	4930533K18Rik	-0.130467	1.80783
ENSMUSG00000091805	Vmn2r108	-0.130401	2.6332
ENSMUSG00000041710	Trpc5	-0.130268	2.34399
ENSMUSG00000051323	Pcdh19	-0.130263	2.70446
ENSMUSG00000092486	2610524H06Rik	-0.130213	2.70918
ENSMUSG00000098454	mmu-mir-7032	-0.130133	2.60364
ENSMUSG00000075122	Cd80	-0.130038	2.66781
ENSMUSG00000083956	Gm12361	-0.129887	1.41727
ENSMUSG00000090417	Vmn2r94	-0.129803	1.92806
ENSMUSG00000034127	Tspan8	-0.129785	3.829
ENSMUSG00000078498	Gm13151	-0.129783	2.20635
ENSMUSG00000039385	Cdh6	-0.129705	2.00092
ENSMUSG00000096364	Gpr45	-0.129672	1.51873
ENSMUSG00000037735	2810032G03Rik	-0.129592	2.51011
ENSMUSG00000085999	Gm13411	-0.129591	1.57657
ENSMUSG00000028259	Fhl5	-0.129567	1.33531
ENSMUSG00000037624	Kcnk2	-0.129523	3.24795
ENSMUSG00000083586	Gm8688	-0.129519	1.63044
ENSMUSG00000096717	Vmn2r98	-0.129452	1.78401
ENSMUSG00000069733	Ube2u	-0.129349	1.43089
ENSMUSG00000047898	Ccr4	-0.129252	2.8996
ENSMUSG00000051777	Iqcj	-0.129251	2.66733
ENSMUSG00000015957	Wnt11	-0.128944	2.59821
ENSMUSG00000084164	Gm13902	-0.128936	1.71216
ENSMUSG00000059687	Olfr108	-0.128918	1.88986
ENSMUSG00000038891	Prl3b1	-0.128845	2.04006
ENSMUSG00000074592	F830104G03Rik	-0.128804	2.35794
ENSMUSG00000086927	Gm11823	-0.128698	2.00654
ENSMUSG00000085811	Gm11669	-0.128645	2.67625
ENSMUSG00000029269	Sult1b1	-0.128611	1.90707
ENSMUSG00000050023	Olfr1176	-0.128556	1.75448
ENSMUSG00000043832	Clec4a3	-0.128501	2.20187
ENSMUSG00000087371	Gm15541	-0.128268	2.62556
ENSMUSG00000031233	Pgk2	-0.128254	2.89861
ENSMUSG00000035395	Pet2	-0.128234	4.31907
ENSMUSG00000085773	Gm16233	-0.12821	1.48315
ENSMUSG00000020214	Glipr1l2	-0.127987	2.08973
ENSMUSG00000026523	Wdr64	-0.127831	1.99121
ENSMUSG00000087103	Gm13344	-0.127687	1.49711
ENSMUSG00000058028	Zscan5b	-0.127652	1.51924
ENSMUSG00000073043	Atoh1	-0.127559	2.1232
ENSMUSG00000022857	Tmprss15	-0.127557	2.05188
ENSMUSG00000043531	Sorcs1	-0.127553	2.8329
ENSMUSG00000080793	Cbx3-ps3	-0.127521	1.33109
ENSMUSG00000074109	Mrgprx2	-0.127432	2.73987
ENSMUSG00000072511	Hhla1	-0.127427	3.00336
ENSMUSG00000098304	RP24-570C10.7	-0.127372	1.55154
ENSMUSG00000082402	Gm15621	-0.127221	2.18008
ENSMUSG00000047216	Cdh19	-0.127213	2.21248
ENSMUSG00000047674	Pdha2	-0.127193	1.49466
ENSMUSG00000086885	Gm13846	-0.127133	1.87884
ENSMUSG00000070695	Cntnap5a	-0.12712	2.22709
ENSMUSG00000046262	C87977	-0.126979	1.5029
ENSMUSG00000035528	Npffr2	-0.126973	1.83299
ENSMUSG00000090304	Vmn2r99	-0.126891	2.10247
ENSMUSG00000079342	Gm5097	-0.126885	3.28431
ENSMUSG00000037151	Lrrc20	-0.126791	3.6592
ENSMUSG00000094345	Igkv14-126	-0.126761	1.70341
ENSMUSG00000060508	Nlrp9b	-0.126561	2.72023
ENSMUSG00000048810	Olfr202	-0.126493	2.27129
ENSMUSG00000032108	D730048I06Rik	-0.12647	1.88637
ENSMUSG00000056128	Gm9991	-0.12633	1.70491
ENSMUSG00000031559	4930555F03Rik	-0.126159	2.83666
ENSMUSG00000030651	Art2b	-0.125987	2.65904
ENSMUSG00000074448	Gm5615	-0.125894	1.55348
ENSMUSG00000091971	Hspa1a	-0.125864	2.86558
ENSMUSG00000000606	Vmn2r88	-0.125801	3.2957
ENSMUSG00000096853	Olfr1298	-0.125766	1.50277
ENSMUSG00000094950	Vmn2r66	-0.125667	1.58043
ENSMUSG00000026312	Cdh7	-0.125451	3.14695
ENSMUSG00000060663	Olfr175-ps1	-0.125411	1.90843
ENSMUSG00000074595	Wfdc6a	-0.125405	2.07049
ENSMUSG00000099085	RP24-129O14.1	-0.12538	2.83339
ENSMUSG00000028197	Col24a1	-0.125304	2.48321
ENSMUSG00000020548	1700086D15Rik	-0.125254	2.07905
ENSMUSG00000092570	2210019I11Rik	-0.125232	1.31267
ENSMUSG00000034402	Kcnh5	-0.125175	3.20159
ENSMUSG00000084758	Gm12798	-0.125174	1.45853
ENSMUSG00000082277	Gm15807	-0.125133	2.67952
ENSMUSG00000086200	Gm13659	-0.124983	2.38325
ENSMUSG00000079853	Klra1	-0.12492	2.6408
ENSMUSG00000087328	Gm12120	-0.124915	1.86503
ENSMUSG00000060583	Olfr881	-0.124797	1.94658
ENSMUSG00000079356	Mettl4-ps1	-0.124719	2.33697
ENSMUSG00000085757	1700019B21Rik	-0.124695	3.57261
ENSMUSG00000000560	Gabra2	-0.124681	2.48841
ENSMUSG00000086264	Gm15850	-0.124636	4.11538
ENSMUSG00000087088	Gm16638	-0.124569	2.40017
ENSMUSG00000092600	Gm20442	-0.124569	1.89423
ENSMUSG00000031364	Grpr	-0.124518	2.38741
ENSMUSG00000019787	Trdn	-0.124452	2.4081
ENSMUSG00000096946	Gm10474	-0.124434	2.28158
ENSMUSG00000078500	Gm13235	-0.124419	1.36434
ENSMUSG00000003665	Has1	-0.124387	2.29407
ENSMUSG00000049100	Pcdh10	-0.124265	2.70295
ENSMUSG00000082368	Gm11225	-0.124252	2.14236
ENSMUSG00000050783	Htr1f	-0.124106	2.61912
ENSMUSG00000081931	Gm15211	-0.124091	2.80336
ENSMUSG00000090003	Gm15882	-0.124034	1.57496
ENSMUSG00000016386	Mpped2	-0.123949	1.85933
ENSMUSG00000090449	Gm17076	-0.123921	2.30994
ENSMUSG00000062561	Gm10118	-0.123863	2.99998
ENSMUSG00000047702	Olfr1388	-0.123847	1.76616
ENSMUSG00000089842	Gm16338	-0.123846	1.72657
ENSMUSG00000097776	Gm26795	-0.12378	2.36376
ENSMUSG00000048706	Lurap1l	-0.123753	2.08514
ENSMUSG00000066772	Obox3	-0.123711	2.21628
ENSMUSG00000029245	Epha5	-0.123688	2.83666
ENSMUSG00000056755	Grm7	-0.12359	2.14071
ENSMUSG00000079679	Vwde	-0.123578	1.88877
ENSMUSG00000030945	Acsm2	-0.123573	1.93514
ENSMUSG00000090793	Gm6650	-0.12357	2.39648
ENSMUSG00000081321	Gm15304	-0.1235	1.46935
ENSMUSG00000030373	Psg28	-0.123483	1.61343
ENSMUSG00000056035	Cyp3a11	-0.123321	3.10951
ENSMUSG00000089790	Gm16588	-0.123229	1.3716
ENSMUSG00000024268	Celf4	-0.123174	2.51046
ENSMUSG00000067795	4930444P10Rik	-0.123167	2.15255
ENSMUSG00000021743	Fezf2	-0.123145	1.34241
ENSMUSG00000097338	Gm2464	-0.123082	2.30591
ENSMUSG00000020672	Sntg2	-0.12298	1.59691
ENSMUSG00000095412	Gm5885	-0.122946	2.1191
ENSMUSG00000058183	Mmel1	-0.1229	2.16739
ENSMUSG00000056184	Olfr283	-0.122898	3.03353
ENSMUSG00000073006	Gm732	-0.122841	2.50189
ENSMUSG00000070594	Gm4788	-0.122828	2.06838
ENSMUSG00000060187	Lrrc10	-0.122732	1.69483
ENSMUSG00000029335	Bmp3	-0.12273	2.79193
ENSMUSG00000025004	Cyp2c40	-0.122726	2.35811
ENSMUSG00000097609	Gm26659	-0.122695	1.86412
ENSMUSG00000086654	Gm13165	-0.122669	1.63428
ENSMUSG00000091694	Apol11b	-0.122636	1.48997
ENSMUSG00000079546	Gm11146	-0.122561	1.30314
ENSMUSG00000070856	Olfr1115	-0.122466	2.05901
ENSMUSG00000097968	Tpi-rs2	-0.122457	2.4684
ENSMUSG00000078253	Krtap16-1	-0.122384	1.89219
ENSMUSG00000093533	Vmn2r-ps119	-0.122362	2.05949
ENSMUSG00000092413	Olfr115	-0.122281	1.91005
ENSMUSG00000033805	Ephx4	-0.122223	2.22348
ENSMUSG00000082696	Gm15040	-0.122219	1.84767
ENSMUSG00000001131	Timp1	-0.122078	1.36044
ENSMUSG00000029235	Pdcl2	-0.122077	2.08636
ENSMUSG00000031073	Fgf15	-0.122051	1.59871
ENSMUSG00000030017	Reg3g	-0.122007	2.06133
ENSMUSG00000066896	Olfr18	-0.121973	2.08781
ENSMUSG00000085101	Gm13227	-0.121948	2.79336
ENSMUSG00000096822	Olfr344	-0.121943	1.34607
ENSMUSG00000056457	Prl2c3	-0.121932	1.36391
ENSMUSG00000051678	Pcdhb6	-0.121906	2.78641
ENSMUSG00000096320	Olfr1471	-0.121893	2.22279
ENSMUSG00000037033	Clca4	-0.121868	2.56795
ENSMUSG00000037771	Slc32a1	-0.121867	4.18739
ENSMUSG00000000296	Tpd52l1	-0.121847	1.65778
ENSMUSG00000042425	Frmpd3	-0.121815	1.97843
ENSMUSG00000090315	Vmn2r104	-0.12179	1.74554
ENSMUSG00000080795	Gm6783	-0.121722	1.55911
ENSMUSG00000083266	Gm12572	-0.121494	1.97377
ENSMUSG00000070902	Zfp352	-0.121482	1.51843
ENSMUSG00000033684	Qsox1	-0.121468	3.90209
ENSMUSG00000062791	Gm382	-0.121313	2.18355
ENSMUSG00000073119	Speer4a	-0.121309	2.70056
ENSMUSG00000036095	Dgkb	-0.121249	1.96911
ENSMUSG00000074882	Cyp2c68	-0.12121	1.38037
ENSMUSG00000093502	Gm20700	-0.121115	2.22872
ENSMUSG00000081742	Gm9051	-0.120959	2.92118
ENSMUSG00000046178	Nxph1	-0.120931	2.95753
ENSMUSG00000084095	Gm11834	-0.120873	1.77466
ENSMUSG00000044248	Vmn1r45	-0.120855	2.6489
ENSMUSG00000043312	Olfr131	-0.120643	4.20259
ENSMUSG00000043498	9330132A10Rik	-0.120595	1.58304
ENSMUSG00000080762	Gm11879	-0.120567	1.3897
ENSMUSG00000073001	Cylc1	-0.120508	3.1755
ENSMUSG00000057074	Ces1g	-0.120482	2.37451
ENSMUSG00000048766	Skint10	-0.120453	2.3217
ENSMUSG00000073913	Olfr678	-0.120359	3.27833
ENSMUSG00000071656	Lrrn4cl	-0.120326	1.63361
ENSMUSG00000059003	Grin2a	-0.120295	1.74019
ENSMUSG00000050587	Lrrc4c	-0.120247	1.73495
ENSMUSG00000051879	Krt71	-0.120244	2.97068
ENSMUSG00000021721	Htr1a	-0.120228	3.80261
ENSMUSG00000052759	Gpr25	-0.120215	3.99312
ENSMUSG00000074060	Fbxw15	-0.120195	2.36799
ENSMUSG00000079516	Reg3a	-0.120185	2.04717
ENSMUSG00000005547	Cyp2a5	-0.120182	2.52519
ENSMUSG00000081302	Gm12020	-0.120055	2.52046
ENSMUSG00000027015	Cybrd1	-0.119991	2.39636
ENSMUSG00000084315	Vmn1r-ps128	-0.119981	1.85298
ENSMUSG00000027157	4930430A15Rik	-0.119972	2.38985
ENSMUSG00000070465	Gm9696	-0.11993	3.15855
ENSMUSG00000033715	Akr1c14	-0.119863	2.48436
ENSMUSG00000097171	Gm17644	-0.119815	2.00891
ENSMUSG00000028116	Myoz2	-0.119764	1.6272
ENSMUSG00000056223	Spata31	-0.119671	2.2076
ENSMUSG00000068428	Gmnc	-0.119624	1.53199
ENSMUSG00000060530	A930017M01Rik	-0.119619	1.53275
ENSMUSG00000043126	D830039M14Rik	-0.119546	1.81716
ENSMUSG00000030236	Slco1b2	-0.11949	1.84415
ENSMUSG00000071104	Ccdc110	-0.119472	2.56214
ENSMUSG00000097869	C230021G24Rik	-0.119448	3.2074
ENSMUSG00000004872	Pax3	-0.119432	1.82504
ENSMUSG00000020051	Pah	-0.119426	3.76256
ENSMUSG00000029883	1700074P13Rik	-0.119413	2.06316
ENSMUSG00000038540	Tmc3	-0.119308	3.99333
ENSMUSG00000065083	n-R5s205	-0.119159	3.20163
ENSMUSG00000083584	Gm15394	-0.119157	1.92342
ENSMUSG00000087157	Gm15685	-0.119139	2.08031
ENSMUSG00000019785	Clvs2	-0.119115	2.77862
ENSMUSG00000019906	Lin7a	-0.1191	1.69405
ENSMUSG00000051118	Olfr77	-0.119093	2.08511
ENSMUSG00000092458	Gm18737	-0.119087	1.89673
ENSMUSG00000057699	Tas2r131	-0.119023	2.07879
ENSMUSG00000079246	Slc35f4	-0.119011	1.65185
ENSMUSG00000031772	Cntnap4	-0.118994	2.06448
ENSMUSG00000049098	Olfr147	-0.118917	1.93431
ENSMUSG00000096917	2500002B13Rik	-0.118916	2.9081
ENSMUSG00000058550	Dppa4	-0.118891	2.81875
ENSMUSG00000063590	Slc22a28	-0.118869	2.27759
ENSMUSG00000048703	Speer4b	-0.118843	2.06514
ENSMUSG00000072944	Nup62cl	-0.118817	2.08828
ENSMUSG00000058513	Olfr801	-0.11878	1.52252
ENSMUSG00000084162	Gm11251	-0.118648	1.65004
ENSMUSG00000025370	Cdh9	-0.118608	1.48239
ENSMUSG00000020436	Gabrg2	-0.118598	2.20309
ENSMUSG00000055078	Gabra5	-0.118559	2.32008
ENSMUSG00000085781	Gm15640	-0.118499	1.74018
ENSMUSG00000085386	Gm13630	-0.118459	2.87775
ENSMUSG00000085049	A230071N21Rik	-0.118392	1.3132
ENSMUSG00000036198	Arhgap36	-0.118384	4.39312
ENSMUSG00000052581	Lrrtm4	-0.118337	3.5161
ENSMUSG00000010122	Slc47a1	-0.118264	1.8233
ENSMUSG00000084829	Gm14266	-0.118263	1.6102
ENSMUSG00000083387	Gm11860	-0.11818	1.50321
ENSMUSG00000085180	AI838599	-0.11815	2.04981
ENSMUSG00000083789	Gm6092	-0.11812	2.9214
ENSMUSG00000090125	Pou3f1	-0.118047	1.62077
ENSMUSG00000041248	Kcnj1	-0.118035	1.90984
ENSMUSG00000086450	Gm14077	-0.117986	3.96396
ENSMUSG00000026527	Rgs7	-0.117912	1.71804
ENSMUSG00000048516	Adam26a	-0.11789	1.63989
ENSMUSG00000049560	Defb20	-0.117836	1.43522
ENSMUSG00000094764	Olfr346	-0.117805	1.49056
ENSMUSG00000050195	Scd4	-0.117759	1.4781
ENSMUSG00000092225	Gm2381	-0.117721	2.49523
ENSMUSG00000067356	B430203G13Rik	-0.11772	2.33018
ENSMUSG00000041791	Capza3	-0.117705	1.62648
ENSMUSG00000087469	Gm16142	-0.117661	2.90256
ENSMUSG00000027776	Il12a	-0.117642	1.38773
ENSMUSG00000032925	Itgbl1	-0.1176	1.63813
ENSMUSG00000027208	Fgf7	-0.117552	3.34267
ENSMUSG00000086382	Gm13705	-0.117488	1.35484
ENSMUSG00000019894	Slc6a15	-0.117482	2.26365
ENSMUSG00000098068	Gm7909	-0.117442	3.49383
ENSMUSG00000074378	Bsph1	-0.117422	1.82186
ENSMUSG00000080775	Gm6368	-0.117408	1.75477
ENSMUSG00000005696	Sh2d1a	-0.117373	1.54426
ENSMUSG00000032446	Eomes	-0.117192	2.6626
ENSMUSG00000068535	Olfr169	-0.117192	2.17437
ENSMUSG00000048377	Foxi2	-0.117131	1.46562
ENSMUSG00000081557	Gm5697	-0.117036	1.41572
ENSMUSG00000026610	Esrrg	-0.117028	2.28214
ENSMUSG00000028264	Spaca1	-0.116984	1.57464
ENSMUSG00000061367	Olfr771	-0.11685	1.49116
ENSMUSG00000025658	Cnksr2	-0.11679	2.37738
ENSMUSG00000029838	Ptn	-0.116765	3.10062
ENSMUSG00000073154	9330158H04Rik	-0.116752	3.00916
ENSMUSG00000056270	Prr9	-0.116729	1.79957
ENSMUSG00000051729	Gm5087	-0.116685	2.71995
ENSMUSG00000019803	Nr2e1	-0.116678	2.11889
ENSMUSG00000050541	Adra1b	-0.116538	2.63207
ENSMUSG00000060630	Zfp735	-0.116509	1.9937
ENSMUSG00000017723	Wfdc2	-0.116448	2.68671
ENSMUSG00000050074	Spink8	-0.116248	1.99257
ENSMUSG00000025754	Agbl1	-0.116213	2.68362
ENSMUSG00000087306	A230004M16Rik	-0.116178	1.82677
ENSMUSG00000028813	CK137956	-0.116147	2.25294
ENSMUSG00000050808	Muc15	-0.116119	1.74507
ENSMUSG00000021622	Ckmt2	-0.116097	2.5554
ENSMUSG00000035186	Ubd	-0.11607	1.49579
ENSMUSG00000086048	Drr1	-0.116029	2.45477
ENSMUSG00000022269	42805	-0.116027	1.59457
ENSMUSG00000082618	Gm14852	-0.115929	1.60417
ENSMUSG00000096922	Gm17308	-0.115801	2.46891
ENSMUSG00000083857	Gm12584	-0.115782	1.56347
ENSMUSG00000066268	Olfr586	-0.115779	1.46385
ENSMUSG00000031519	Asb5	-0.115776	1.52665
ENSMUSG00000068180	AY512915	-0.11575	2.79527
ENSMUSG00000078808	Vmn1r58	-0.115727	1.82408
ENSMUSG00000086738	Gm12154	-0.115713	2.55022
ENSMUSG00000098151	Gm10292	-0.115623	2.31599
ENSMUSG00000052504	Epha3	-0.115543	3.03631
ENSMUSG00000029916	Agk	-0.115495	3.43978
ENSMUSG00000029697	Fezf1	-0.115454	2.70365
ENSMUSG00000031725	Ces1f	-0.115446	2.07624
ENSMUSG00000027499	Pkia	-0.115443	1.90671
ENSMUSG00000026163	Sphkap	-0.115437	2.43657
ENSMUSG00000090877	Hspa1b	-0.115411	3.41619
ENSMUSG00000092269	Gm9577	-0.115357	2.46624
ENSMUSG00000069227	Gprin1	-0.115287	2.34801
ENSMUSG00000062369	Usp17lb	-0.115186	1.80479
ENSMUSG00000043850	Clrn1	-0.115178	1.82078
ENSMUSG00000020607	Fam84a	-0.115148	2.77068
ENSMUSG00000084283	Gm14914	-0.115037	2.12862
ENSMUSG00000074564	Gm10720	-0.114986	5.06583
ENSMUSG00000027022	Xirp2	-0.114964	3.29198
ENSMUSG00000040490	Lrfn2	-0.114848	1.44327
ENSMUSG00000036986	Pml	-0.114803	4.10476
ENSMUSG00000073917	Olfr665	-0.114794	1.65372
ENSMUSG00000090839	Gm17094	-0.114776	1.93731
ENSMUSG00000094192	Olfr452	-0.114761	2.20199
ENSMUSG00000067010	Vmn2r10	-0.114725	2.26597
ENSMUSG00000071567	A830039N20Rik	-0.114718	1.74805
ENSMUSG00000007872	Id3	-0.114664	1.79834
ENSMUSG00000000182	Fgf23	-0.11452	2.3674
ENSMUSG00000086157	Gm14643	-0.11448	2.06886
ENSMUSG00000080741	Gm11398	-0.114479	3.0015
ENSMUSG00000026805	Barhl1	-0.114451	2.29106
ENSMUSG00000066031	Gm13023	-0.114385	1.42629
ENSMUSG00000082658	Fau-ps2	-0.114377	2.24598
ENSMUSG00000024497	Pou4f3	-0.114362	2.61682
ENSMUSG00000014329	Bicc1	-0.11429	2.42042
ENSMUSG00000086147	Gm13150	-0.11424	1.92052
ENSMUSG00000096956	0610007N19Rik	-0.114178	2.07624
ENSMUSG00000039095	En2	-0.114136	1.56572
ENSMUSG00000040514	4921511H03Rik	-0.114086	2.65809
ENSMUSG00000054944	5330416C01Rik	-0.114041	2.60857
ENSMUSG00000098684	RP23-302F9.4	-0.113911	2.65367
ENSMUSG00000084258	Gm12054	-0.113881	1.63988
ENSMUSG00000097364	Gm26719	-0.113872	3.84313
ENSMUSG00000041380	Htr2c	-0.113843	3.36276
ENSMUSG00000085290	Gm16129	-0.113838	1.79058
ENSMUSG00000019936	Epyc	-0.113826	1.33551
ENSMUSG00000050810	Oog3	-0.113794	1.77933
ENSMUSG00000021534	1700001L19Rik	-0.113783	1.76843
ENSMUSG00000092049	Vmn2r4	-0.113774	1.8255
ENSMUSG00000073514	Dok6	-0.113762	2.09568
ENSMUSG00000097612	Gm26509	-0.113744	1.86155
ENSMUSG00000055538	Zcchc24	-0.11371	2.84229
ENSMUSG00000037653	Kctd8	-0.113706	1.53663
ENSMUSG00000030507	Dbx1	-0.113696	1.72792
ENSMUSG00000022054	Nefm	-0.113643	2.16261
ENSMUSG00000041670	Rims1	-0.113635	2.51175
ENSMUSG00000063018	2010204K13Rik	-0.113627	1.78448
ENSMUSG00000048628	4930542C16Rik	-0.113617	1.75445
ENSMUSG00000090222	Gm16340	-0.113592	2.31751
ENSMUSG00000081712	Gm12096	-0.113569	2.07532
ENSMUSG00000035274	Tpbg	-0.113558	2.03357
ENSMUSG00000092397	C130080G10Rik	-0.113544	2.18071
ENSMUSG00000035580	Kcnh8	-0.113517	2.25752
ENSMUSG00000082772	Gm381	-0.113509	2.52327
ENSMUSG00000021678	F2rl1	-0.113507	1.83944
ENSMUSG00000034795	Ccdc122	-0.113503	1.44437
ENSMUSG00000073573	Spink11	-0.11342	1.51716
ENSMUSG00000038188	Scarf1	-0.113412	2.54154
ENSMUSG00000092210	A930009A15Rik	-0.113382	1.93916
ENSMUSG00000034912	Mdga2	-0.113372	3.23575
ENSMUSG00000031290	Lrch2	-0.113356	1.53851
ENSMUSG00000084995	4930596M17Rik	-0.113341	1.85002
ENSMUSG00000096736	Gm17535	-0.11329	5.02697
ENSMUSG00000062319	Gm10115	-0.113251	2.02679
ENSMUSG00000087145	Gm12665	-0.113227	2.7003
ENSMUSG00000055373	Fut9	-0.113218	2.47045
ENSMUSG00000038148	Cldn16	-0.113217	1.78593
ENSMUSG00000097491	Gm2366	-0.113142	4.04769
ENSMUSG00000036949	Slc39a12	-0.113081	2.01086
ENSMUSG00000084927	Gm5724	-0.11308	1.61784
ENSMUSG00000060787	Olfr464	-0.113059	1.57251
ENSMUSG00000058070	Eml1	-0.113056	4.70688
ENSMUSG00000085094	Gm15692	-0.112965	1.59542
ENSMUSG00000054827	Cyp2c50	-0.112934	3.48788
ENSMUSG00000049122	Frmd3	-0.112895	2.01078
ENSMUSG00000087601	Uchl1os	-0.112885	2.14437
ENSMUSG00000090498	Kcnb2	-0.112878	2.81972
ENSMUSG00000021415	4933417A18Rik	-0.112836	1.45717
ENSMUSG00000036192	Rorb	-0.112803	2.51808
ENSMUSG00000030092	Cntn6	-0.112701	2.46211
ENSMUSG00000072259	Gm5592	-0.112636	2.19662
ENSMUSG00000040536	Necab1	-0.112612	1.88171
ENSMUSG00000073652	Apol7d	-0.112533	2.73725
ENSMUSG00000054510	Gm14461	-0.112399	1.73334
ENSMUSG00000082915	Gm15240	-0.112207	2.3975
ENSMUSG00000075066	Olfr32	-0.112162	2.10948
ENSMUSG00000086903	Hotair	-0.112135	2.09687
ENSMUSG00000025265	Fgd1	-0.112098	3.22447
ENSMUSG00000097825	9630001P10Rik	-0.112056	2.82456
ENSMUSG00000046317	BC107364	-0.11203	1.93028
ENSMUSG00000025475	Gpr123	-0.112009	3.6884
ENSMUSG00000082348	Gm12807	-0.112001	1.8763
ENSMUSG00000081041	Nlk-ps1	-0.111987	2.5738
ENSMUSG00000041633	Kctd12b	-0.111924	2.98348
ENSMUSG00000090199	Gm16029	-0.111866	2.32089
ENSMUSG00000048231	H2-M10.4	-0.111843	1.68968
ENSMUSG00000059218	Gm13084	-0.111818	1.66331
ENSMUSG00000082179	Gm11407	-0.11179	3.38514
ENSMUSG00000089833	Gm16542	-0.111772	1.8532
ENSMUSG00000021416	Eci3	-0.11177	1.59833
ENSMUSG00000097464	Gm26736	-0.111702	2.63821
ENSMUSG00000049929	Lpar4	-0.111697	1.98715
ENSMUSG00000021730	Hcn1	-0.111666	2.11593
ENSMUSG00000005107	Slc2a9	-0.111651	4.41369
ENSMUSG00000069890	1700024J04Rik	-0.1116	2.49413
ENSMUSG00000081046	Gm12846	-0.111587	1.99517
ENSMUSG00000098128	Gm3693	-0.111582	1.71961
ENSMUSG00000096111	Gm21917	-0.11158	1.57935
ENSMUSG00000041144	Dnah7b	-0.111576	2.51373
ENSMUSG00000057457	Phex	-0.111565	4.47168
ENSMUSG00000003657	Calb2	-0.111525	2.32691
ENSMUSG00000051976	6330444E15Rik	-0.111482	3.74848
ENSMUSG00000081550	Gm15877	-0.111481	1.53562
ENSMUSG00000085463	9430024E24Rik	-0.111461	1.57097
ENSMUSG00000028172	Tacr3	-0.111401	1.86308
ENSMUSG00000066092	Gm10152	-0.111305	2.18124
ENSMUSG00000022113	Trim52	-0.111237	1.53252
ENSMUSG00000035283	Adrb1	-0.111232	1.64074
ENSMUSG00000040289	Hey1	-0.111208	2.24642
ENSMUSG00000086777	B230104C08Rik	-0.111195	1.38978
ENSMUSG00000098161	Gm26975	-0.111157	1.7022
ENSMUSG00000037798	Mat1a	-0.111045	1.39139
ENSMUSG00000014104	Sval2	-0.111025	2.83089
ENSMUSG00000097241	Gm26907	-0.110945	2.48557
ENSMUSG00000026336	Slco6d1	-0.110809	1.64528
ENSMUSG00000021509	Slc25a48	-0.110806	2.41597
ENSMUSG00000027966	Col11a1	-0.110743	2.24666
ENSMUSG00000068748	Ptprz1	-0.110669	2.83522
ENSMUSG00000043003	Rasef	-0.110662	2.08808
ENSMUSG00000030713	Klk7	-0.110631	2.28886
ENSMUSG00000093511	Gm20680	-0.110575	2.1009
ENSMUSG00000086812	Gm8978	-0.110557	1.7789
ENSMUSG00000053146	Olfr352	-0.110526	1.86084
ENSMUSG00000082080	Gm9246	-0.110491	2.03299
ENSMUSG00000097563	Gm26638	-0.110479	2.42286
ENSMUSG00000022525	Hrasls	-0.11046	1.94853
ENSMUSG00000052562	Slc22a30	-0.110412	1.43684
ENSMUSG00000086373	Gm11978	-0.110407	2.22285
ENSMUSG00000001504	Irx2	-0.110386	4.10571
ENSMUSG00000051969	Tlr11	-0.110332	2.87208
ENSMUSG00000024647	Cbln2	-0.110288	2.25453
ENSMUSG00000029442	Wdr66	-0.110271	2.95124
ENSMUSG00000038968	Klk1b16	-0.110198	1.91037
ENSMUSG00000083081	Gm13223	-0.11016	2.23632
ENSMUSG00000039488	Cntn5	-0.110154	1.70377
ENSMUSG00000037358	4930578C19Rik	-0.110146	1.88015
ENSMUSG00000090146	4930405H06Rik	-0.11013	2.0704
ENSMUSG00000029878	Dbpht2	-0.110084	1.69338
ENSMUSG00000096385	Gm11168	-0.110083	4.86075
ENSMUSG00000001773	Folh1	-0.110053	1.58112
ENSMUSG00000057715	A830018L16Rik	-0.109918	2.01106
ENSMUSG00000043972	Opn5	-0.10987	1.75121
ENSMUSG00000030075	Cntn3	-0.109861	1.53965
ENSMUSG00000043463	Rab9b	-0.109851	1.37441
ENSMUSG00000053054	Adh6a	-0.109821	1.94937
ENSMUSG00000073405	C920025E04Rik	-0.109815	2.62142
ENSMUSG00000087481	Gm15608	-0.109724	2.27623
ENSMUSG00000059169	Krt40	-0.109687	3.09953
ENSMUSG00000021439	Ctsq	-0.109601	2.48721
ENSMUSG00000097248	Gm2694	-0.109582	1.57095
ENSMUSG00000025666	Tmem47	-0.109582	2.95222
ENSMUSG00000093756	Gm18594	-0.109571	2.55427
ENSMUSG00000036790	Slitrk2	-0.10952	1.47487
ENSMUSG00000025900	Rp1	-0.109513	2.01298
ENSMUSG00000054477	Kcnn2	-0.109475	1.45077
ENSMUSG00000034551	Hdx	-0.109439	2.21283
ENSMUSG00000050394	Armcx6	-0.109406	3.16861
ENSMUSG00000035780	Ugt2a3	-0.1094	2.0915
ENSMUSG00000056870	Gulp1	-0.109378	1.69884
ENSMUSG00000071138	Tex24	-0.109367	2.41487
ENSMUSG00000000263	Glra1	-0.109325	3.62801
ENSMUSG00000042179	Pnliprp1	-0.109299	2.32091
ENSMUSG00000098509	Rgs21	-0.109241	2.23541
ENSMUSG00000034648	Lrrn1	-0.109227	1.98719
ENSMUSG00000062184	Hs6st2	-0.109206	2.29005
ENSMUSG00000097198	9330159N05Rik	-0.109187	1.70487
ENSMUSG00000039539	Sgcz	-0.109054	2.08473
ENSMUSG00000086278	Olfr75-ps1	-0.109033	2.57609
ENSMUSG00000085217	6030471H07Rik	-0.108944	1.6947
ENSMUSG00000098370	RP23-282G22.2	-0.108914	1.99487
ENSMUSG00000078934	9230113P08Rik	-0.108914	2.12695
ENSMUSG00000026398	Nr5a2	-0.108793	2.7833
ENSMUSG00000047261	Gap43	-0.108781	1.87424
ENSMUSG00000084885	3010001F23Rik	-0.10876	1.57336
ENSMUSG00000049214	Skint7	-0.108748	1.66995
ENSMUSG00000095532	Mup-ps13	-0.108724	1.30916
ENSMUSG00000092758	Gm25026	-0.10872	1.47294
ENSMUSG00000036925	Spt1	-0.108709	1.40502
ENSMUSG00000025427	Rnf165	-0.108682	2.18045
ENSMUSG00000030862	Cpxm2	-0.108673	2.14305
ENSMUSG00000096201	Gm10715	-0.10863	5.1203
ENSMUSG00000052426	Gm9877	-0.108618	1.85788
ENSMUSG00000016626	Nlrp14	-0.108602	1.75204
ENSMUSG00000056296	Synpr	-0.108595	2.81155
ENSMUSG00000001657	Hoxc8	-0.108561	2.21693
ENSMUSG00000037028	Gm12800	-0.108472	1.47531
ENSMUSG00000047606	Ankrd34c	-0.10847	2.55438
ENSMUSG00000089982	Gm7568	-0.108307	2.24043
ENSMUSG00000085708	Gm16063	-0.108296	2.0066
ENSMUSG00000070526	Peg12	-0.108271	3.04666
ENSMUSG00000097311	Gm26871	-0.108268	2.29864
ENSMUSG00000086142	Smek3-ps	-0.108232	1.85083
ENSMUSG00000070704	Ugt2b36	-0.108193	2.02916
ENSMUSG00000040254	Sema3d	-0.108187	2.98717
ENSMUSG00000039639	Kcne1	-0.108097	2.28641
ENSMUSG00000029193	Cckar	-0.108095	2.64645
ENSMUSG00000082117	Gm4994	-0.10808	1.64289
ENSMUSG00000054988	Agtr1b	-0.108041	2.49097
ENSMUSG00000030345	Dyrk4	-0.108019	2.23585
ENSMUSG00000054493	Gm9947	-0.108018	3.79843
ENSMUSG00000043549	4932442L08Rik	-0.107968	2.03307
ENSMUSG00000031517	Gpm6a	-0.107963	3.66451
ENSMUSG00000096446	Gm8104	-0.107873	2.24633
ENSMUSG00000044349	Snhg11	-0.107852	2.5203
ENSMUSG00000030968	Pdilt	-0.107851	3.99647
ENSMUSG00000079606	Gm595	-0.107829	1.43548
ENSMUSG00000053930	Shisa6	-0.10781	1.94478
ENSMUSG00000046282	Adam20	-0.107793	2.13991
ENSMUSG00000097430	Gm10544	-0.107785	1.50102
ENSMUSG00000075249	Fsip2	-0.10777	2.32925
ENSMUSG00000026109	Tmeff2	-0.107744	3.03461
ENSMUSG00000015619	Gata3	-0.107684	3.04127
ENSMUSG00000080696	Gm12825	-0.107669	2.70176
ENSMUSG00000049537	Tecrl	-0.107633	2.36808
ENSMUSG00000064329	Scn1a	-0.107574	2.26205
ENSMUSG00000085071	Gm14066	-0.107547	1.58404
ENSMUSG00000050241	Klre1	-0.10753	2.07107
ENSMUSG00000030539	Sema4b	-0.107455	3.60786
ENSMUSG00000044364	Tmem74b	-0.107437	2.30434
ENSMUSG00000014030	Pax5	-0.107422	2.68563
ENSMUSG00000097836	Gm26903	-0.107371	2.6619
ENSMUSG00000083749	Gm13100	-0.107368	1.49774
ENSMUSG00000039676	Capsl	-0.107363	1.75981
ENSMUSG00000048960	Prex2	-0.10725	2.50438
ENSMUSG00000049761	Pmis2	-0.107239	2.04937
ENSMUSG00000040372	Gpr63	-0.107158	2.14564
ENSMUSG00000031651	Triml1	-0.107156	2.85025
ENSMUSG00000021359	Tfap2a	-0.107097	2.85127
ENSMUSG00000097875	Gm26704	-0.107063	2.93175
ENSMUSG00000043087	Olfr855	-0.107055	1.92608
ENSMUSG00000086049	Gm12735	-0.107054	2.85655
ENSMUSG00000006205	Htra1	-0.107034	2.98838
ENSMUSG00000004267	Eno2	-0.107027	4.99042
ENSMUSG00000090160	4930480K15Rik	-0.107025	2.04711
ENSMUSG00000090436	Vmn2r75	-0.107016	1.72672
ENSMUSG00000057321	Usp17ld	-0.107003	1.62878
ENSMUSG00000022231	Sema5a	-0.106826	3.47507
ENSMUSG00000031991	Spata19	-0.106789	2.30536
ENSMUSG00000074919	Gm10787	-0.106788	1.44287
ENSMUSG00000074981	Dcdc5	-0.106775	2.4436
ENSMUSG00000032564	Cpne4	-0.106715	2.55304
ENSMUSG00000063531	Sema3e	-0.106702	1.84085
ENSMUSG00000017309	Cd300lg	-0.106697	2.68968
ENSMUSG00000062624	Cyp2c67	-0.10667	1.84037
ENSMUSG00000087667	Gm13381	-0.106608	2.38777
ENSMUSG00000062300	Pvrl2	-0.106587	2.10889
ENSMUSG00000033737	Fndc3c1	-0.106546	3.19283
ENSMUSG00000085139	A730046J19Rik	-0.106543	1.61275
ENSMUSG00000040046	Tph1	-0.106515	1.47384
ENSMUSG00000005202	Shbg	-0.106514	2.06284
ENSMUSG00000069171	Nr2f1	-0.106506	1.73337
ENSMUSG00000059256	Gzmd	-0.106471	1.87801
ENSMUSG00000078737	Gm2128	-0.106439	1.31114
ENSMUSG00000022996	Wnt10b	-0.106401	2.55833
ENSMUSG00000084909	4930528G23Rik	-0.106377	1.39349
ENSMUSG00000000142	Axin2	-0.10631	2.36969
ENSMUSG00000035394	Ccdc11	-0.106307	1.87853
ENSMUSG00000097276	4930525G20Rik	-0.106302	1.77464
ENSMUSG00000095098	Ccdc85b	-0.106295	1.87811
ENSMUSG00000032921	Odf4	-0.106295	2.22622
ENSMUSG00000095547	Gm10719	-0.106293	4.76155
ENSMUSG00000020704	Asic2	-0.106283	2.29917
ENSMUSG00000085582	3110099E03Rik	-0.106272	1.68028
ENSMUSG00000025808	Ccdc7	-0.106255	1.62478
ENSMUSG00000049148	Plcxd3	-0.106223	3.88287
ENSMUSG00000066240	Olfr517	-0.106207	1.62601
ENSMUSG00000067229	Cyp2c66	-0.106177	1.5645
ENSMUSG00000003452	Bicd1	-0.106114	4.41376
ENSMUSG00000044359	P2ry4	-0.106081	1.36798
ENSMUSG00000089922	3110039M20Rik	-0.106078	2.47551
ENSMUSG00000040563	BC018242	-0.106073	3.24382
ENSMUSG00000082894	Gm6480	-0.106037	1.45467
ENSMUSG00000002688	Prkd1	-0.105967	1.7735
ENSMUSG00000070044	Fam149a	-0.105939	1.57375
ENSMUSG00000095093	Vmn2r111	-0.105796	2.38492
ENSMUSG00000050663	Trhde	-0.105763	2.97895
ENSMUSG00000033569	Bai3	-0.105713	2.12791
ENSMUSG00000046435	Gm13078	-0.105636	2.07844
ENSMUSG00000099201	RP23-117B4.1	-0.105624	1.33234
ENSMUSG00000081823	Cyp4a28-ps	-0.105621	2.16547
ENSMUSG00000029359	Tesc	-0.105608	1.61354
ENSMUSG00000086681	Gm16178	-0.105575	1.62407
ENSMUSG00000091060	7420461P10Rik	-0.105557	2.48561
ENSMUSG00000032360	Hcrtr2	-0.105518	1.87739
ENSMUSG00000096225	Lhx8	-0.105448	1.56851
ENSMUSG00000093738	AI606473	-0.105442	2.12523
ENSMUSG00000024172	St6gal2	-0.105392	2.14569
ENSMUSG00000070504	Fcrl6	-0.105386	2.27277
ENSMUSG00000019899	Lama2	-0.105382	2.3477
ENSMUSG00000093634	Gm10860	-0.105345	1.47085
ENSMUSG00000061937	Csn1s2a	-0.105291	1.80286
ENSMUSG00000082625	Gm15204	-0.105268	2.37214
ENSMUSG00000086862	Gm13546	-0.105249	2.01178
ENSMUSG00000019888	Mgat4c	-0.105242	2.0194
ENSMUSG00000042992	Loh12cr1	-0.105167	2.86992
ENSMUSG00000052516	Robo2	-0.105166	3.64867
ENSMUSG00000064859	Gm24524	-0.105158	2.18347
ENSMUSG00000055026	Gabrg3	-0.10511	2.55747
ENSMUSG00000044726	BC030476	-0.105087	1.32144
ENSMUSG00000098032	Vax2os	-0.105068	3.29298
ENSMUSG00000029299	Abcg3	-0.10498	2.47374
ENSMUSG00000089907	Gm16169	-0.104911	1.93496
ENSMUSG00000048349	Pou4f1	-0.104878	1.68603
ENSMUSG00000086902	Gm11728	-0.104859	2.32424
ENSMUSG00000085063	Gm16024	-0.104834	1.57829
ENSMUSG00000029167	Ppargc1a	-0.104819	3.39995
ENSMUSG00000066760	Psg16	-0.104807	1.57969
ENSMUSG00000032609	Klhdc8b	-0.10471	2.70651
ENSMUSG00000069835	Sat2	-0.104694	1.46127
ENSMUSG00000014725	Adam28	-0.104689	2.34168
ENSMUSG00000094819	Olfr53	-0.104679	1.40029
ENSMUSG00000024261	Syt4	-0.104627	1.86681
ENSMUSG00000041361	Myzap	-0.104584	5.2204
ENSMUSG00000083794	Gm16123	-0.104579	1.52477
ENSMUSG00000049571	9330101J02Rik	-0.104507	2.06956
ENSMUSG00000050134	Olfr430	-0.104502	2.63812
ENSMUSG00000057003	Myh4	-0.104362	3.44065
ENSMUSG00000043659	Npsr1	-0.10433	1.87302
ENSMUSG00000021187	Tc2n	-0.104316	1.4969
ENSMUSG00000054757	Akr1c20	-0.104264	1.81412
ENSMUSG00000060534	Dcc	-0.104236	3.67487
ENSMUSG00000046755	Kif2b	-0.104191	2.37317
ENSMUSG00000097067	Gm26743	-0.104162	3.43001
ENSMUSG00000084339	Gm6141	-0.104157	2.98448
ENSMUSG00000031074	Fgf3	-0.104141	1.90052
ENSMUSG00000093589	Gm18367	-0.104074	1.39335
ENSMUSG00000029059	Fam213b	-0.104064	3.54268
ENSMUSG00000081211	Gm14886	-0.104064	2.03801
ENSMUSG00000089851	Gm16579	-0.104061	2.20012
ENSMUSG00000083172	Gm13409	-0.104025	1.36463
ENSMUSG00000066061	Olfr1335	-0.104022	2.54277
ENSMUSG00000067649	Mageb18	-0.103975	2.16711
ENSMUSG00000098739	RP23-448C3.1	-0.103975	1.79139
ENSMUSG00000023159	Psg29	-0.103893	2.54803
ENSMUSG00000037014	Sstr4	-0.103871	3.48342
ENSMUSG00000042717	Ppp1r3a	-0.103853	1.47573
ENSMUSG00000031594	Fgl1	-0.103845	1.99313
ENSMUSG00000096607	7530416G11Rik	-0.103813	1.72217
ENSMUSG00000038457	Tmem255b	-0.103807	1.5499
ENSMUSG00000087022	9130024F11Rik	-0.103794	2.10791
ENSMUSG00000052131	Akr1b7	-0.103768	1.65582
ENSMUSG00000055515	Vmn2r81	-0.103763	3.34077
ENSMUSG00000022076	Klhl1	-0.103717	3.61345
ENSMUSG00000087095	Emx2os	-0.103707	3.04611
ENSMUSG00000073794	I0C0044D17Rik	-0.103699	1.59301
ENSMUSG00000073012	Fnd3c2	-0.103682	1.38157
ENSMUSG00000040170	Fmo2	-0.10362	2.73335
ENSMUSG00000019892	Lrriq1	-0.103618	3.4
ENSMUSG00000054236	Olfr481	-0.1036	2.21527
ENSMUSG00000048387	Osr1	-0.103595	2.61938
ENSMUSG00000054412	Gm4793	-0.103574	2.572
ENSMUSG00000097122	Gm26624	-0.103565	2.29638
ENSMUSG00000085820	4933406K04Rik	-0.10356	1.46392
ENSMUSG00000024175	Tekt4	-0.103496	1.91292
ENSMUSG00000090104	Gm16241	-0.103494	2.25838
ENSMUSG00000029370	Rassf6	-0.10342	2.34213
ENSMUSG00000058019	Ces5a	-0.103415	4.56671
ENSMUSG00000087194	Skint6	-0.103363	1.57523
ENSMUSG00000085247	4930545L23Rik	-0.10334	2.21484
ENSMUSG00000030069	Prok2	-0.103336	3.11949
ENSMUSG00000057443	Olfr138	-0.103276	1.46323
ENSMUSG00000041301	Cftr	-0.103239	1.6015
ENSMUSG00000033214	Slitrk5	-0.103223	1.61985
ENSMUSG00000024411	Aqp4	-0.103203	1.521
ENSMUSG00000043301	Kcnj6	-0.103191	2.01982
ENSMUSG00000041984	Rptn	-0.103185	1.87999
ENSMUSG00000007035	Msh5	-0.103129	4.96864
ENSMUSG00000087553	5730412P04Rik	-0.103073	1.79027
ENSMUSG00000056553	Ptprn2	-0.103056	1.61204
ENSMUSG00000031285	Dcx	-0.103023	2.58991
ENSMUSG00000045528	Olfr891	-0.102988	1.76995
ENSMUSG00000097429	Gm26520	-0.10298	2.15612
ENSMUSG00000041044	Lrit1	-0.102978	2.74642
ENSMUSG00000057228	Aadat	-0.102968	1.50393
ENSMUSG00000079105	C7	-0.102954	1.88097
ENSMUSG00000061808	Ttr	-0.102954	1.90123
ENSMUSG00000037386	Rims2	-0.102895	2.47487
ENSMUSG00000024008	Cpne5	-0.102886	4.0991
ENSMUSG00000064115	Cadm2	-0.102871	1.86078
ENSMUSG00000038112	AW551984	-0.102831	3.63982
ENSMUSG00000063157	Csn2	-0.102789	1.40949
ENSMUSG00000049252	Lrp1b	-0.102783	2.7981
ENSMUSG00000095139	Pou3f2	-0.102777	2.43729
ENSMUSG00000085264	Gm15581	-0.102722	2.53887
ENSMUSG00000043583	4930470P17Rik	-0.102712	1.5183
ENSMUSG00000038255	Neurod2	-0.102696	1.79338
ENSMUSG00000066097	Cyp2j11	-0.102678	1.34688
ENSMUSG00000057614	Gnai1	-0.102641	2.41482
ENSMUSG00000086760	1700025D23Rik	-0.102637	3.66107
ENSMUSG00000028370	Pappa	-0.102629	2.37482
ENSMUSG00000066269	Olfr575	-0.102617	2.28661
ENSMUSG00000083138	Cyp4a29-ps	-0.102612	2.27933
ENSMUSG00000043020	Wdr63	-0.102581	1.58012
ENSMUSG00000081885	Gm13231	-0.10256	2.82211
ENSMUSG00000027761	Aadac	-0.10255	1.76639
ENSMUSG00000037379	Spon2	-0.102497	1.40979
ENSMUSG00000097682	4930554H23Rik	-0.102484	3.23425
ENSMUSG00000028533	Izumo3	-0.10248	2.36698
ENSMUSG00000073730	4933415F23Rik	-0.102457	1.58502
ENSMUSG00000031620	1700007B14Rik	-0.102455	1.35195
ENSMUSG00000090643	Gm3453	-0.102445	2.21715
ENSMUSG00000085702	Gm16722	-0.102443	1.72589
ENSMUSG00000095706	Olfr209	-0.102439	2.15585
ENSMUSG00000053025	Sv2b	-0.102432	1.54393
ENSMUSG00000074736	Syndig1	-0.102425	1.93114
ENSMUSG00000057719	Sh3rf2	-0.102423	2.97808
ENSMUSG00000074764	Sel1l2	-0.102354	1.77393
ENSMUSG00000025909	Sntg1	-0.102308	1.90833
ENSMUSG00000051081	Gm4847	-0.102303	2.59117
ENSMUSG00000020354	Sgcd	-0.102239	2.76756
ENSMUSG00000068874	Selenbp1	-0.102215	2.15502
ENSMUSG00000074817	Papolb	-0.102204	2.35397
ENSMUSG00000025551	Fgf14	-0.102193	1.74386
ENSMUSG00000085743	8430419K02Rik	-0.102142	1.53856
ENSMUSG00000089688	1600010F14Rik	-0.10207	2.55088
ENSMUSG00000053886	Sh2d4a	-0.10204	2.65367
ENSMUSG00000039133	9330171B17Rik	-0.101983	2.12299
ENSMUSG00000091375	Vmn2r15	-0.101931	2.17565
ENSMUSG00000013236	Ptprs	-0.10192	3.61454
ENSMUSG00000066000	2610305D13Rik	-0.101899	2.2042
ENSMUSG00000065999	Gm13154	-0.101895	2.15534
ENSMUSG00000023781	Hes7	-0.101873	2.00459
ENSMUSG00000069118	1700008P02Rik	-0.101821	1.89694
ENSMUSG00000046312	AI464131	-0.10179	1.35328
ENSMUSG00000026188	Tmem169	-0.101782	1.60196
ENSMUSG00000031089	Slc6a14	-0.101698	1.31376
ENSMUSG00000045689	Pcdhb4	-0.101694	1.6099
ENSMUSG00000097907	Raxos1	-0.101679	2.19773
ENSMUSG00000050189	Etos1	-0.101652	2.88446
ENSMUSG00000037375	Hhat	-0.101647	2.5212
ENSMUSG00000086617	Gm11635	-0.101643	1.59152
ENSMUSG00000078597	Cyp4a12b	-0.101573	2.23404
ENSMUSG00000027674	Pex5l	-0.10151	2.95767
ENSMUSG00000097313	Gm26569	-0.101431	2.20138
ENSMUSG00000081977	Flg	-0.101398	1.9272
ENSMUSG00000061928	Dsg1b	-0.101385	1.83149
ENSMUSG00000079262	Slco1a6	-0.101328	1.40771
ENSMUSG00000027790	Sis	-0.101282	1.93968
ENSMUSG00000028789	Adc	-0.101257	2.58309
ENSMUSG00000040037	Negr1	-0.101253	2.00665
ENSMUSG00000091573	Serpina3d-ps	-0.101249	1.57774
ENSMUSG00000097446	Gm26629	-0.101201	1.65304
ENSMUSG00000034645	Zyg11a	-0.101174	1.80435
ENSMUSG00000038805	Six3	-0.101174	3.86629
ENSMUSG00000054746	Abca15	-0.101168	3.11947
ENSMUSG00000032011	Thy1	-0.101157	1.60323
ENSMUSG00000094426	Olfr478	-0.101148	2.56575
ENSMUSG00000056300	Gm13247	-0.101103	2.82401
ENSMUSG00000045013	Olfr711	-0.101062	1.64903
ENSMUSG00000044378	Slc15a5	-0.101051	3.26338
ENSMUSG00000086909	Gm4926	-0.10105	2.083
ENSMUSG00000053375	Atp6v1e2	-0.101035	2.16971
ENSMUSG00000022311	Csmd3	-0.101033	2.87782
ENSMUSG00000097516	4930467D21Rik	-0.101014	1.49669
ENSMUSG00000085649	A730032A03Rik	-0.101009	1.76614
ENSMUSG00000045835	Hdgfl1	-0.100936	1.5956
ENSMUSG00000027820	Mme	-0.100917	2.8974
ENSMUSG00000003228	Grk5	-0.100901	3.40808
ENSMUSG00000044667	D3Bwg0562e	-0.100888	3.24472
ENSMUSG00000073565	Prr16	-0.100864	1.75804
ENSMUSG00000097312	Gm26870	-0.100851	4.71017
ENSMUSG00000033015	4933427E13Rik	-0.100826	1.79565
ENSMUSG00000096995	2810029C07Rik	-0.100817	1.66361
ENSMUSG00000086842	Gm15681	-0.10079	1.5756
ENSMUSG00000024500	Ppp2r2b	-0.100774	2.20063
ENSMUSG00000058571	Gpc6	-0.100752	1.6444
ENSMUSG00000064310	Zpld1	-0.100737	1.40551
ENSMUSG00000022449	Adamts20	-0.100713	1.90784
ENSMUSG00000033981	Gria2	-0.100693	1.95823
ENSMUSG00000049685	Cyp2g1	-0.100676	1.33008
ENSMUSG00000093540	4930505M18Rik	-0.100671	1.78299
ENSMUSG00000005649	Cabp5	-0.100665	3.15501
ENSMUSG00000085427	6430710C18Rik	-0.100631	1.62424
ENSMUSG00000034780	B3galt1	-0.100559	2.87044
ENSMUSG00000028031	Dkk2	-0.100539	4.13212
ENSMUSG00000021217	Tshz3	-0.100402	2.24116
ENSMUSG00000092357	Vmn2r-ps83	-0.100399	1.73715
ENSMUSG00000048814	Lonrf2	-0.100382	1.60553
ENSMUSG00000097610	A930012L18Rik	-0.100364	2.67316
ENSMUSG00000029576	Radil	-0.100364	2.17929
ENSMUSG00000044951	Mylk4	-0.100346	2.34392
ENSMUSG00000072575	Eddm3b	-0.100342	2.32294
ENSMUSG00000048251	Bcl11b	-0.100331	2.4663
ENSMUSG00000087388	Gm12128	-0.100327	1.7856
ENSMUSG00000086095	Gm15328	-0.100308	1.89258
ENSMUSG00000028885	Smpdl3b	-0.100238	1.91799
ENSMUSG00000083814	Gm5133	-0.100204	2.22623
ENSMUSG00000022505	Emp2	-0.100195	2.39915
ENSMUSG00000087201	Gm15261	-0.100184	2.60276
ENSMUSG00000061601	Pclo	-0.100179	3.40987
ENSMUSG00000005360	Slc1a3	-0.100169	2.26934
ENSMUSG00000026983	Il1f5	-0.100112	2.44816
ENSMUSG00000086594	4930505H01Rik	-0.100107	2.15371
ENSMUSG00000034683	Ppp1r1c	-0.100069	4.98058
ENSMUSG00000092549	Gm20491	-0.100032	1.81433
ENSMUSG00000098015	Gm6600	-0.0999972	1.54405
ENSMUSG00000070858	Gm1673	-0.0999847	1.57272
ENSMUSG00000074164	Vmn2r-ps54	-0.0999815	1.59939
ENSMUSG00000075334	Rprm	-0.0999812	1.75822
ENSMUSG00000097881	B230209K01Rik	-0.0999666	1.60385
ENSMUSG00000040601	Nlrp4a	-0.0999603	3.51802
ENSMUSG00000069378	Prdm6	-0.0999353	1.63648
ENSMUSG00000037161	Mgarp	-0.0999191	1.95922
ENSMUSG00000029563	Foxp2	-0.0999152	3.55796
ENSMUSG00000024502	Jakmip2	-0.0998621	2.30897
ENSMUSG00000073722	4931408C20Rik	-0.0998262	3.13224
ENSMUSG00000078838	Gm17382	-0.0998133	1.59247
ENSMUSG00000058656	Samd12	-0.0997936	2.30904
ENSMUSG00000032495	Lrrc2	-0.0997908	3.0949
ENSMUSG00000085307	Gm11525	-0.0997782	1.83623
ENSMUSG00000034689	4921530L21Rik	-0.0997013	1.76155
ENSMUSG00000082893	Gm11383	-0.0996703	1.90118
ENSMUSG00000083345	Gm6491	-0.0996647	1.52707
ENSMUSG00000044365	Cxxc4	-0.0996554	2.51445
ENSMUSG00000029695	Aass	-0.0996433	2.04298
ENSMUSG00000035540	Gc	-0.0996377	1.70382
ENSMUSG00000095525	Olfr834	-0.0996336	1.47336
ENSMUSG00000026574	Dpt	-0.0996137	2.552
ENSMUSG00000081596	Gm15968	-0.0995617	1.59058
ENSMUSG00000093510	Vmn2r-ps21	-0.099533	1.56961
ENSMUSG00000083851	Gm12365	-0.0995302	1.9631
ENSMUSG00000051736	Fam229b	-0.0995135	3.61269
ENSMUSG00000093725	Gm18595	-0.0994582	2.62902
ENSMUSG00000053161	Daw1	-0.0994498	1.82068
ENSMUSG00000047878	A4galt	-0.0993466	1.42087
ENSMUSG00000049160	4930469G21Rik	-0.0993096	1.75562
ENSMUSG00000086754	Gm16098	-0.0992131	1.68566
ENSMUSG00000002240	4930432K09Rik	-0.0992032	2.57873
ENSMUSG00000054976	Nyap2	-0.0990913	2.89746
ENSMUSG00000082361	Btc	-0.0990889	1.60161
ENSMUSG00000075139	Olfr1162	-0.0990787	3.0645
ENSMUSG00000035187	Nkx6-1	-0.0990699	1.33599
ENSMUSG00000090942	F830016B08Rik	-0.0990671	2.43086
ENSMUSG00000053490	Trim60	-0.099052	2.21011
ENSMUSG00000039646	Vasn	-0.0990307	1.71276
ENSMUSG00000078868	Gm14412	-0.0990223	1.60218
ENSMUSG00000078618	4930456L15Rik	-0.0989944	1.48537
ENSMUSG00000007653	Gabrb2	-0.0989513	2.82238
ENSMUSG00000020622	Nt5c1b	-0.0989467	1.67664
ENSMUSG00000038883	Prl3a1	-0.0989148	1.37606
ENSMUSG00000037492	Zmat4	-0.0988838	1.82839
ENSMUSG00000004939	Nmrk2	-0.0988757	1.5305
ENSMUSG00000097393	D030068K23Rik	-0.0987931	2.35601
ENSMUSG00000090828	Sox2ot	-0.0986419	2.04679
ENSMUSG00000060594	Layn	-0.0986261	2.23815
ENSMUSG00000066372	Vmn2r65	-0.0986215	1.64358
ENSMUSG00000049630	C1ql3	-0.0986154	1.79857
ENSMUSG00000035057	4933434I20Rik	-0.0985972	1.66693
ENSMUSG00000059659	Gm10069	-0.098593	2.10843
ENSMUSG00000068506	Gm5800	-0.098583	2.07888
ENSMUSG00000086908	Gm13598	-0.0985649	1.41442
ENSMUSG00000025665	Rps6ka6	-0.0985558	1.36506
ENSMUSG00000076586	Igkv8-21	-0.0985158	1.82692
ENSMUSG00000054764	Mtnr1a	-0.0984671	1.98571
ENSMUSG00000058488	Kl	-0.0984561	2.55565
ENSMUSG00000034910	Pygo1	-0.0984515	2.16799
ENSMUSG00000042258	Isl1	-0.0984431	1.6801
ENSMUSG00000093394	Gm20621	-0.0983989	5.069
ENSMUSG00000041911	Dlx1	-0.098395	2.07248
ENSMUSG00000020723	Cacng4	-0.0983866	2.6436
ENSMUSG00000028963	Uts2	-0.0983839	1.97985
ENSMUSG00000090919	Pabpc4l	-0.0983813	2.81298
ENSMUSG00000021732	Fgf10	-0.0983009	1.89623
ENSMUSG00000047014	Catsperb	-0.0982742	1.75005
ENSMUSG00000070866	Zfp804a	-0.0982639	3.0704
ENSMUSG00000056025	Clca1	-0.098256	2.0759
ENSMUSG00000028294	1700003M02Rik	-0.0982559	1.47899
ENSMUSG00000034040	Wbscr17	-0.0982417	1.60142
ENSMUSG00000059991	Nptx2	-0.0981438	1.36598
ENSMUSG00000087374	Gm15457	-0.0981053	2.30944
ENSMUSG00000041202	Pla2g2d	-0.098097	1.6922
ENSMUSG00000095812	Gm5473	-0.0980516	2.10303
ENSMUSG00000021613	Hapln1	-0.0980367	3.46397
ENSMUSG00000032679	Cd59a	-0.0980258	1.99359
ENSMUSG00000085833	Gm13003	-0.0980049	2.25523
ENSMUSG00000009596	Taf7l	-0.0979921	1.92188
ENSMUSG00000058207	Serpina3k	-0.0979562	2.05304
ENSMUSG00000061150	Vmn1r229	-0.097934	1.5362
ENSMUSG00000071686	Tex13a	-0.0978914	1.93928
ENSMUSG00000068263	Efcc1	-0.0978877	2.41202
ENSMUSG00000038793	Lefty1	-0.0978566	1.70999
ENSMUSG00000083928	Gm4991	-0.0977873	2.70076
ENSMUSG00000027004	Frzb	-0.0977713	2.53265
ENSMUSG00000059279	Olfr224	-0.0977533	1.61271
ENSMUSG00000026586	Prrx1	-0.0977533	2.0915
ENSMUSG00000095331	Ptma-ps1	-0.0977306	2.90562
ENSMUSG00000087104	1700085B03Rik	-0.0977152	4.52964
ENSMUSG00000042607	Asb4	-0.097712	2.4758
ENSMUSG00000060317	Acnat2	-0.0976981	1.64164
ENSMUSG00000045103	Dmd	-0.0976911	2.85434
ENSMUSG00000083258	Gm5939	-0.0976818	1.45226
ENSMUSG00000028883	Sema3a	-0.0976723	2.40159
ENSMUSG00000089990	Gm15852	-0.0976542	1.56809
ENSMUSG00000031688	Pou4f2	-0.0976514	2.20184
ENSMUSG00000080946	Gm12985	-0.0976144	2.98624
ENSMUSG00000097384	Gm26815	-0.0976073	1.30128
ENSMUSG00000041986	Elmod1	-0.0976024	1.63945
ENSMUSG00000050395	Tnfsf15	-0.0974823	1.69089
ENSMUSG00000093580	Gm20706	-0.0974591	1.85239
ENSMUSG00000002265	Peg3	-0.0974542	2.7641
ENSMUSG00000017978	Cadps2	-0.0974494	2.13962
ENSMUSG00000045216	Hs6st1	-0.0974376	2.94
ENSMUSG00000050295	Foxc1	-0.0974155	1.67925
ENSMUSG00000021367	Edn1	-0.0973978	2.1496
ENSMUSG00000055971	Olfr378	-0.0973884	1.75036
ENSMUSG00000041735	Gm13178	-0.0973394	1.61589
ENSMUSG00000087116	Gm12324	-0.0973031	2.25322
ENSMUSG00000085194	Gm16012	-0.0972759	2.65969
ENSMUSG00000079362	Gbp6	-0.0972427	2.84235
ENSMUSG00000081314	Gm14132	-0.0971735	2.14271
ENSMUSG00000078291	Gm3940	-0.0971414	2.08415
ENSMUSG00000070419	Cyp3a57	-0.0971271	2.21354
ENSMUSG00000074939	Chrm5	-0.0971163	1.72177
ENSMUSG00000066361	Serpina3c	-0.0971068	1.48004
ENSMUSG00000026734	4921504E06Rik	-0.0971031	2.29681
ENSMUSG00000026189	Pecr	-0.0970712	2.58462
ENSMUSG00000049152	Ugt3a2	-0.0970606	1.5821
ENSMUSG00000091028	Gm10722	-0.097013	4.97808
ENSMUSG00000069305	Hist1h4n	-0.0969995	1.60752
ENSMUSG00000028546	Elavl4	-0.0969901	2.35871
ENSMUSG00000054720	Lrrc8c	-0.096968	3.53316
ENSMUSG00000085282	Gm15663	-0.0969562	2.27496
ENSMUSG00000020083	2010107G23Rik	-0.0969389	1.54475
ENSMUSG00000052613	Pcdh15	-0.09687	3.45728
ENSMUSG00000037984	Neurod6	-0.0968404	3.27235
ENSMUSG00000013584	Aldh1a2	-0.096812	2.04327
ENSMUSG00000051200	Olfr513	-0.0968034	1.92427
ENSMUSG00000069132	Nxph2	-0.0967573	1.83024
ENSMUSG00000060420	Vmn1r62	-0.0967381	1.379
ENSMUSG00000031239	Itm2a	-0.0967314	1.43686
ENSMUSG00000047143	Dmrta2	-0.0967277	1.63674
ENSMUSG00000088278	Gm23121	-0.0966979	3.0737
ENSMUSG00000000197	Nalcn	-0.0966952	4.25795
ENSMUSG00000072049	Vmn2r121	-0.0966576	1.48787
ENSMUSG00000022997	Wnt1	-0.0966497	2.54095
ENSMUSG00000087264	1500002O10Rik	-0.0966354	1.56371
ENSMUSG00000070995	Gm6313	-0.0966267	1.7322
ENSMUSG00000061259	Tmprss11d	-0.0966052	1.3443
ENSMUSG00000026934	Lhx3	-0.0966039	1.42064
ENSMUSG00000056987	Fam71d	-0.0965936	2.04372
ENSMUSG00000045083	Lingo2	-0.0965677	1.73125
ENSMUSG00000031489	Adrb3	-0.096484	2.28232
ENSMUSG00000043670	Diras1	-0.0964769	3.32099
ENSMUSG00000043969	Emx2	-0.0964075	2.06366
ENSMUSG00000040420	Cdh18	-0.0964045	1.89566
ENSMUSG00000044976	Wdr72	-0.0963526	2.25941
ENSMUSG00000074207	Adh1	-0.0963271	1.42006
ENSMUSG00000019779	Frk	-0.0962993	1.60723
ENSMUSG00000022619	Mapk8ip2	-0.0962706	1.9359
ENSMUSG00000046318	Ccbe1	-0.0962689	3.312
ENSMUSG00000073116	Gm10471	-0.0962392	1.76631
ENSMUSG00000021259	Cyp46a1	-0.0962392	2.79465
ENSMUSG00000027270	Lamp5	-0.0962074	1.5555
ENSMUSG00000034690	Nlrp4c	-0.0962009	4.02754
ENSMUSG00000043310	Olfr571	-0.0961856	1.3226
ENSMUSG00000050685	Ccdc54	-0.0961712	1.57049
ENSMUSG00000087479	Gm16835	-0.0961548	1.74464
ENSMUSG00000040478	Prdm13	-0.0961471	1.92366
ENSMUSG00000087615	Gm16190	-0.0961399	2.98137
ENSMUSG00000079344	Lipo4	-0.096096	1.35586
ENSMUSG00000030043	Tacr1	-0.096084	1.44778
ENSMUSG00000059401	Mamld1	-0.0960711	2.03378
ENSMUSG00000044033	Ccdc141	-0.0960672	2.52777
ENSMUSG00000060621	Nkpd1	-0.0959888	1.44029
ENSMUSG00000035031	C8a	-0.0959869	1.67424
ENSMUSG00000086067	Gm16183	-0.0959712	1.74768
ENSMUSG00000037605	Lphn3	-0.0959695	2.15146
ENSMUSG00000036242	3632451O06Rik	-0.0959583	2.75842
ENSMUSG00000067156	Gm7337	-0.0959569	2.28968
ENSMUSG00000038242	Aox4	-0.0959544	2.68775
ENSMUSG00000080792	Gm14367	-0.0959072	2.20038
ENSMUSG00000052415	Tchh	-0.0958815	2.2602
ENSMUSG00000092178	Gm3912	-0.0958774	2.05039
ENSMUSG00000021994	Wnt5a	-0.0958645	3.41091
ENSMUSG00000040055	Gjb6	-0.095852	2.33734
ENSMUSG00000027500	Stmn2	-0.0958504	1.93464
ENSMUSG00000095407	Tmem200c	-0.0958494	1.79124
ENSMUSG00000048347	Pcdhb18	-0.0958169	2.90239
ENSMUSG00000037942	Crp	-0.0957974	1.85098
ENSMUSG00000091556	Gm14569	-0.0957768	1.93704
ENSMUSG00000070313	A630095E13Rik	-0.0957603	3.51473
ENSMUSG00000041052	Slc7a13	-0.0957534	2.05402
ENSMUSG00000046352	Gjb2	-0.09571	2.05163
ENSMUSG00000060407	Cyp2a12	-0.0956591	2.75504
ENSMUSG00000007209	Ceacam9	-0.095649	1.59108
ENSMUSG00000029848	Stra8	-0.0956074	2.62957
ENSMUSG00000054537	Tmprss11e	-0.0955846	3.00166
ENSMUSG00000068046	4930430D24Rik	-0.0955476	1.77929
ENSMUSG00000098348	RP23-322E15.2	-0.0955476	1.77929
ENSMUSG00000022306	Zfpm2	-0.0955296	1.33895
ENSMUSG00000024087	Cyp1b1	-0.0955137	2.72103
ENSMUSG00000003420	Fcgrt	-0.0954731	2.91418
ENSMUSG00000093934	Olfr971	-0.0954683	3.18492
ENSMUSG00000059146	Ntrk3	-0.0954452	4.00189
ENSMUSG00000022112	Gpc5	-0.095434	1.92176
ENSMUSG00000090874	Olfr733	-0.0954308	1.888
ENSMUSG00000023945	Slc5a7	-0.0954183	2.26634
ENSMUSG00000037636	Slc25a43	-0.0953898	1.68879
ENSMUSG00000043441	Gpr149	-0.0953869	2.59214
ENSMUSG00000051528	Olfr424	-0.0953677	1.7412
ENSMUSG00000071691	Gm960	-0.0953172	1.60781
ENSMUSG00000040405	Havcr1	-0.0952818	1.33322
ENSMUSG00000028226	Mmp16	-0.095274	1.948
ENSMUSG00000052417	Olfr720	-0.0952739	1.41911
ENSMUSG00000034774	Dsg1c	-0.0952701	2.86943
ENSMUSG00000030972	Acsm5	-0.0952574	2.65315
ENSMUSG00000094921	Vmn2r112	-0.0952362	2.38545
ENSMUSG00000072709	Olfr380	-0.0951993	1.72119
ENSMUSG00000023886	Smoc2	-0.0951778	2.35924
ENSMUSG00000071719	Tmem28	-0.095175	1.72368
ENSMUSG00000066072	Cyp4a10	-0.0951525	1.92906
ENSMUSG00000066652	Lefty2	-0.0951516	2.50338
ENSMUSG00000031626	Sorbs2	-0.0951333	2.44671
ENSMUSG00000028004	Npy2r	-0.0951164	1.8796
ENSMUSG00000033871	Ppargc1b	-0.0950693	1.58192
ENSMUSG00000027985	Lef1	-0.0950596	2.2112
ENSMUSG00000086171	C630020P19Rik	-0.0950448	2.81942
ENSMUSG00000055960	Skint4	-0.0950381	2.09845
ENSMUSG00000063626	Unc5d	-0.0950308	1.87522
ENSMUSG00000085845	Gm13944	-0.0950248	2.54121
ENSMUSG00000066368	Actl11	-0.0949851	2.42028
ENSMUSG00000086319	Gm16087	-0.0949755	2.45705
ENSMUSG00000094721	Olfr1462	-0.0949746	1.68971
ENSMUSG00000074354	9230115E21Rik	-0.0949682	1.80377
ENSMUSG00000024519	Cplx4	-0.0949645	1.40036
ENSMUSG00000085568	Gm14858	-0.0949477	2.19075
ENSMUSG00000034151	Zbbx	-0.0949235	1.85777
ENSMUSG00000055961	BC051076	-0.0949038	2.03435
ENSMUSG00000033276	Stk36	-0.0948906	3.03321
ENSMUSG00000048230	Fbxo43	-0.0948892	1.52002
ENSMUSG00000083201	Gm12080	-0.0948887	1.71186
ENSMUSG00000045648	Vwc2l	-0.0948578	1.54805
ENSMUSG00000057977	Skint11	-0.0948384	2.9393
ENSMUSG00000054102	Nlrp9a	-0.0948351	2.06551
ENSMUSG00000055523	Gucy2g	-0.094818	1.5281
ENSMUSG00000099207	RP23-302F9.1	-0.0948159	2.07661
ENSMUSG00000021098	4930447C04Rik	-0.0948119	3.31102
ENSMUSG00000021336	Slc17a4	-0.0947913	1.59039
ENSMUSG00000094985	Topaz1	-0.0947164	1.5697
ENSMUSG00000081490	Gm11830	-0.094663	2.96443
ENSMUSG00000031714	Gab1	-0.0946304	3.42668
ENSMUSG00000060424	2610017I09Rik	-0.0946247	2.12588
ENSMUSG00000036123	Slc9a3	-0.0946247	2.07877
ENSMUSG00000003505	Psg18	-0.0946238	1.59365
ENSMUSG00000059898	Dsc3	-0.0946209	1.95056
ENSMUSG00000097910	5033428I22Rik	-0.0945982	2.2391
ENSMUSG00000062609	Kcnj15	-0.0945807	2.25253
ENSMUSG00000030077	Chl1	-0.0945468	2.94773
ENSMUSG00000004542	Psg19	-0.0945332	1.7029
ENSMUSG00000062073	Gm10109	-0.0945083	1.50058
ENSMUSG00000055214	Pld5	-0.094495	1.53035
ENSMUSG00000039728	Slc6a5	-0.0944868	2.5221
ENSMUSG00000016918	Sulf1	-0.0944759	3.29993
ENSMUSG00000008489	Elavl2	-0.0944473	2.72829
ENSMUSG00000035472	Slc25a21	-0.0944281	2.35326
ENSMUSG00000090486	BC035947	-0.0944272	1.73394
ENSMUSG00000097553	4930455D15Rik	-0.0944226	1.96393
ENSMUSG00000073072	G930045G22Rik	-0.0944049	2.15842
ENSMUSG00000081903	Gm11387	-0.094399	1.49291
ENSMUSG00000045201	Lrrc3b	-0.0943875	1.31331
ENSMUSG00000087541	Gm15830	-0.0943765	1.6788
ENSMUSG00000057967	Fgf18	-0.0942645	2.25307
ENSMUSG00000089997	1810020O05Rik	-0.0942353	2.26882
ENSMUSG00000068196	Col8a1	-0.0942347	2.4605
ENSMUSG00000094534	Gm20945	-0.094221	1.37309
ENSMUSG00000054005	Mill1	-0.0942184	2.17489
ENSMUSG00000038997	Asb17	-0.0941759	1.59945
ENSMUSG00000069873	4930438A08Rik	-0.0941658	4.27039
ENSMUSG00000048038	4932418E24Rik	-0.0941487	1.46481
ENSMUSG00000060988	Galnt13	-0.0941476	2.10445
ENSMUSG00000095891	Gm10717	-0.0941142	4.96656
ENSMUSG00000059277	R74862	-0.0941077	2.31329
ENSMUSG00000034457	Eda2r	-0.0940309	2.19256
ENSMUSG00000061911	Myt1l	-0.0940187	2.11707
ENSMUSG00000027792	Bche	-0.0939423	1.36352
ENSMUSG00000082082	Gm13230	-0.0938854	2.45018
ENSMUSG00000029423	Piwil1	-0.0938848	2.40179
ENSMUSG00000045967	Gpr158	-0.0938728	1.33424
ENSMUSG00000047061	Gm9817	-0.0938658	1.40641
ENSMUSG00000082079	Gm14490	-0.0938469	1.7475
ENSMUSG00000039706	Ldb2	-0.0938461	1.48831
ENSMUSG00000030235	Slco1c1	-0.0938277	1.43843
ENSMUSG00000078502	Gm13212	-0.0938103	2.7228
ENSMUSG00000095186	Gm10718	-0.0938095	5.13014
ENSMUSG00000024107	Lhcgr	-0.0938027	3.76328
ENSMUSG00000092244	Gm20410	-0.0937717	1.79378
ENSMUSG00000044043	Pcdhb14	-0.0937716	2.85468
ENSMUSG00000073176	Zfp449	-0.0937521	2.0132
ENSMUSG00000042096	Dao	-0.0937338	1.6014
ENSMUSG00000063529	Stmnd1	-0.0937216	1.59347
ENSMUSG00000075588	Hoxb2	-0.0936878	1.58165
ENSMUSG00000084937	Gm11228	-0.0936726	1.47659
ENSMUSG00000027168	Pax6	-0.0936632	2.97148
ENSMUSG00000087369	Gm14696	-0.093659	2.76887
ENSMUSG00000024306	Ccdc178	-0.0936386	1.39496
ENSMUSG00000044352	Sowaha	-0.0936068	2.0323
ENSMUSG00000038048	Cntnap5c	-0.0936052	1.5369
ENSMUSG00000030688	Stard10	-0.0935802	3.44038
ENSMUSG00000092077	Olfr101	-0.0935538	1.78672
ENSMUSG00000001566	Mnx1	-0.0935502	1.98539
ENSMUSG00000091415	Ak9	-0.0935166	1.62866
ENSMUSG00000071015	Gm136	-0.0935074	1.49452
ENSMUSG00000078598	Skint5	-0.0934977	1.48033
ENSMUSG00000050052	Tdrp	-0.0934916	1.58202
ENSMUSG00000026147	Col9a1	-0.0934785	3.23083
ENSMUSG00000087303	Lipo2	-0.0934659	2.19775
ENSMUSG00000026043	Col3a1	-0.0934398	2.60336
ENSMUSG00000043333	Rhbdl2	-0.0934312	2.33217
ENSMUSG00000075277	6720416L17Rik	-0.0933447	1.46629
ENSMUSG00000084196	Gm12874	-0.0933339	1.84265
ENSMUSG00000029260	Ugt2b34	-0.0933019	2.42942
ENSMUSG00000063130	Calml3	-0.0932824	2.40605
ENSMUSG00000030486	Zfp108	-0.0932754	2.00874
ENSMUSG00000074224	4932431P20Rik	-0.0932694	3.23352
ENSMUSG00000095893	Olfr884	-0.0932578	1.36342
ENSMUSG00000097247	1500012K07Rik	-0.0932484	1.75789
ENSMUSG00000086823	1700028P15Rik	-0.0932402	1.77646
ENSMUSG00000058297	Spock2	-0.0932277	2.37814
ENSMUSG00000021604	Irx4	-0.0931898	1.85094
ENSMUSG00000085631	9630028H03Rik	-0.0931711	1.93602
ENSMUSG00000067860	Zic3	-0.0931615	2.33638
ENSMUSG00000048304	Slitrk3	-0.093126	1.49746
ENSMUSG00000087150	BC064078	-0.0930955	2.0794
ENSMUSG00000047686	Zcchc5	-0.0930888	2.49374
ENSMUSG00000055415	Atp10b	-0.0930712	1.98515
ENSMUSG00000044156	Hepacam2	-0.0930693	1.53164
ENSMUSG00000097579	Gm26799	-0.0930503	3.01256
ENSMUSG00000046191	Pcdhb20	-0.0930333	2.46268
ENSMUSG00000015653	Steap2	-0.0930266	2.3267
ENSMUSG00000028589	1700012P22Rik	-0.0930057	1.67718
ENSMUSG00000036169	Sostdc1	-0.093003	1.51939
ENSMUSG00000029830	Svopl	-0.0929771	2.68074
ENSMUSG00000066392	Nrxn3	-0.0928593	3.36521
ENSMUSG00000028807	Zbtb8a	-0.0928505	3.20943
ENSMUSG00000057093	C030039L03Rik	-0.0927445	1.70653
ENSMUSG00000091387	Gcnt4	-0.0927149	1.96341
ENSMUSG00000020218	Wif1	-0.0927044	3.07792
ENSMUSG00000052854	Nrk	-0.0927043	2.31234
ENSMUSG00000085982	9530051G07Rik	-0.0926914	1.58591
ENSMUSG00000057195	Ceacam13	-0.0926871	2.12482
ENSMUSG00000072780	Vmn2r24	-0.092677	2.20547
ENSMUSG00000021974	Fgf9	-0.0926643	2.0415
ENSMUSG00000000223	Drp2	-0.0926633	2.4936
ENSMUSG00000020181	Nav3	-0.0926545	2.7431
ENSMUSG00000041923	Nol4	-0.0926478	1.8507
ENSMUSG00000078627	42804	-0.0926464	1.71287
ENSMUSG00000029875	AI836003	-0.0926147	3.92803
ENSMUSG00000030562	Nox4	-0.092579	3.21263
ENSMUSG00000025321	Itgb8	-0.0925594	2.01318
ENSMUSG00000085794	Vax2os	-0.0925342	2.02753
ENSMUSG00000021492	F12	-0.092524	2.65798
ENSMUSG00000083527	Gm12001	-0.0924974	2.22663
ENSMUSG00000040118	Cacna2d1	-0.092494	1.66065
ENSMUSG00000095457	Gm21911	-0.0924779	1.3606
ENSMUSG00000075065	Olfr1270	-0.0924594	1.78228
ENSMUSG00000040650	Cyp2b23	-0.0924369	2.13456
ENSMUSG00000098620	RP23-432N1.6	-0.0923974	1.75247
ENSMUSG00000079263	Gm6614	-0.0923734	1.86977
ENSMUSG00000020545	Lrrc72	-0.0923704	1.67313
ENSMUSG00000038591	Colec10	-0.0923488	2.94885
ENSMUSG00000056605	Krt72	-0.092327	1.84942
ENSMUSG00000036972	Zic4	-0.0923263	2.54453
ENSMUSG00000039552	Rsph4a	-0.0923071	2.20405
ENSMUSG00000034057	Myrfl	-0.0923052	1.71171
ENSMUSG00000052496	Pkdrej	-0.092302	1.96857
ENSMUSG00000097225	A330076H08Rik	-0.0922568	2.15407
ENSMUSG00000084911	Gm16185	-0.0922351	3.47269
ENSMUSG00000000567	Sox9	-0.0922344	1.54063
ENSMUSG00000073130	Gm1141	-0.0922169	1.69426
ENSMUSG00000083292	Gm12010	-0.092214	1.52285
ENSMUSG00000046844	Vat1l	-0.0922104	3.29247
ENSMUSG00000081289	Gm14857	-0.0922043	2.33853
ENSMUSG00000022261	Sdc2	-0.0921684	2.71653
ENSMUSG00000035963	Odf3l2	-0.0921525	1.54969
ENSMUSG00000090949	Vmn2r77	-0.0921287	2.74357
ENSMUSG00000097084	Foxl1	-0.0921168	1.70983
ENSMUSG00000022321	Cdh10	-0.0920587	3.15661
ENSMUSG00000085555	2610035F20Rik	-0.0919696	1.67326
ENSMUSG00000034810	Scn7a	-0.0919376	3.16467
ENSMUSG00000044292	Olfr978	-0.0919272	1.65008
ENSMUSG00000026077	Npas2	-0.0919072	1.94656
ENSMUSG00000075324	Fign	-0.0919028	2.50037
ENSMUSG00000082686	Gm12961	-0.0919025	2.11709
ENSMUSG00000082862	Gm13806	-0.091882	1.73396
ENSMUSG00000032262	Elovl4	-0.0918573	1.52713
ENSMUSG00000092529	Vmn2r-ps80	-0.0918439	1.45143
ENSMUSG00000024210	Ip6k3	-0.0918129	2.9396
ENSMUSG00000079048	4933413L06Rik	-0.0917921	1.78089
ENSMUSG00000042256	Ptchd4	-0.0917195	2.1176
ENSMUSG00000048013	Krt35	-0.0917078	1.32981
ENSMUSG00000081362	Cyp2j7-ps	-0.0916922	2.50445
ENSMUSG00000028713	Cyp4b1	-0.0916815	1.33666
ENSMUSG00000074715	Ccl28	-0.0916792	3.7346
ENSMUSG00000083027	Gm13140	-0.0916676	1.80664
ENSMUSG00000001663	Gstt1	-0.0916219	2.40894
ENSMUSG00000025776	Crispld1	-0.09161	2.50732
ENSMUSG00000048022	Tmem229a	-0.0915819	2.54615
ENSMUSG00000020052	Ascl1	-0.0915818	3.01678
ENSMUSG00000083731	Gm16202	-0.0915782	3.67929
ENSMUSG00000098040	Gm20757	-0.0915711	1.72132
ENSMUSG00000071302	2610044O15Rik8	-0.0915565	2.20777
ENSMUSG00000094347	Olfr784	-0.0915538	3.0665
ENSMUSG00000062036	4932415M13Rik	-0.0915532	1.89351
ENSMUSG00000025597	Klhl4	-0.0915456	2.16637
ENSMUSG00000091490	Triml2	-0.0915364	1.83278
ENSMUSG00000090286	Gm17615	-0.0914534	2.6156
ENSMUSG00000064194	Zfp936	-0.0914476	1.38618
ENSMUSG00000032357	Tinag	-0.0914226	1.50034
ENSMUSG00000027217	Tspan18	-0.091388	2.89164
ENSMUSG00000055298	Ctsj	-0.0913718	1.80001
ENSMUSG00000086646	5133400J02Rik	-0.0913483	1.68859
ENSMUSG00000055421	Pcdh9	-0.0913466	1.38164
ENSMUSG00000093610	Cyp2c53-ps	-0.0913321	1.3155
ENSMUSG00000020867	Spata20	-0.0913134	1.90884
ENSMUSG00000031558	Slit2	-0.0913038	2.61595
ENSMUSG00000057182	Scn3a	-0.0913026	1.65266
ENSMUSG00000095280	Gm21738	-0.0912761	4.9244
ENSMUSG00000097265	Gm26803	-0.0912725	2.49993
ENSMUSG00000022935	Grik1	-0.0912673	1.36868
ENSMUSG00000078160	Gm16503	-0.0912577	2.12304
ENSMUSG00000084904	Gm14827	-0.0912479	2.45567
ENSMUSG00000034087	Nlrp4b	-0.0912415	1.5573
ENSMUSG00000030954	Gp2	-0.0912136	2.30124
ENSMUSG00000067006	Serpinb5	-0.0911816	2.08435
ENSMUSG00000066747	Olfr878	-0.091179	1.41799
ENSMUSG00000074211	Sdhaf1	-0.091177	2.31288
ENSMUSG00000032852	Rspo4	-0.0911684	2.08406
ENSMUSG00000021852	Slc35f4	-0.0911349	1.68479
ENSMUSG00000083864	Gm13719	-0.0911266	2.38674
ENSMUSG00000075134	Olfr1167	-0.0911249	1.50289
ENSMUSG00000080846	Gm13379	-0.091124	3.33172
ENSMUSG00000046743	Fat4	-0.0910936	2.22768
ENSMUSG00000048747	E130114P18Rik	-0.0910906	1.62518
ENSMUSG00000058631	Vmn1r63	-0.0910742	1.44951
ENSMUSG00000004842	Pou1f1	-0.0910514	2.42253
ENSMUSG00000059246	Foxb1	-0.0910507	1.58761
ENSMUSG00000087143	A830082K12Rik	-0.090987	2.62527
ENSMUSG00000096934	Gm26658	-0.090986	1.69393
ENSMUSG00000044550	Tceal3	-0.0909846	1.7355
ENSMUSG00000080807	Gm13117	-0.0909485	2.54103
ENSMUSG00000027318	Adam33	-0.0909441	1.88155
ENSMUSG00000035916	Ptprq	-0.0909346	1.66034
ENSMUSG00000036357	Gpr101	-0.0909114	1.62567
ENSMUSG00000086056	Gm4846	-0.0909077	1.81276
ENSMUSG00000066583	Scgb1b27	-0.0908637	1.36737
ENSMUSG00000062257	Opcml	-0.0908605	3.03411
ENSMUSG00000073951	Olfr598	-0.0908505	1.94351
ENSMUSG00000055838	Olfr357	-0.0908489	1.78681
ENSMUSG00000056073	Grik2	-0.0908368	2.98929
ENSMUSG00000070366	Ppapdc1a	-0.0908229	1.75762
ENSMUSG00000097689	4930471D02Rik	-0.0907919	1.51665
ENSMUSG00000074300	BC030870	-0.090787	1.97641
ENSMUSG00000033900	Map9	-0.0907752	1.79268
ENSMUSG00000029673	Auts2	-0.0907702	2.21722
ENSMUSG00000027445	Cst9	-0.0907509	2.14385
ENSMUSG00000073803	4930544L04Rik	-0.0907265	2.09389
ENSMUSG00000060180	Myh13	-0.0907098	1.73319
ENSMUSG00000079604	Gm13219	-0.090688	2.40311
ENSMUSG00000050650	Mrgpra1	-0.090606	1.80557
ENSMUSG00000068099	1500009C09Rik	-0.0905644	2.65571
ENSMUSG00000057722	Lepr	-0.0905639	3.74703
ENSMUSG00000057723	Krt33b	-0.0905523	1.69256
ENSMUSG00000092130	D030025P21Rik	-0.0904973	2.08047
ENSMUSG00000086487	Gm11638	-0.0904945	1.96923
ENSMUSG00000038257	Glra3	-0.0904872	1.41879
ENSMUSG00000030450	Oca2	-0.0904843	2.7562
ENSMUSG00000045062	Pcdhb7	-0.0904793	1.89884
ENSMUSG00000064293	Cntn4	-0.0904334	2.01724
ENSMUSG00000021047	Nova1	-0.0903842	2.24894
ENSMUSG00000027210	Meis2	-0.0903621	3.88798
ENSMUSG00000073937	Olfr633	-0.0903616	2.40893
ENSMUSG00000010796	Asz1	-0.0903384	1.9612
ENSMUSG00000080778	Gm7199	-0.0903112	2.87614
ENSMUSG00000035407	Kank4	-0.0903015	3.24001
ENSMUSG00000075154	Olfr1134	-0.0902715	2.1453
ENSMUSG00000032013	Trim29	-0.0902434	2.14602
ENSMUSG00000089730	1700007P06Rik	-0.0902325	1.85694
ENSMUSG00000049618	Olfr103	-0.0902204	1.7812
ENSMUSG00000066141	Gm11232	-0.0902005	1.67299
ENSMUSG00000097455	Gm26891	-0.0901909	5.27901
ENSMUSG00000097027	Gm26559	-0.0901809	1.73447
ENSMUSG00000097300	Gm26835	-0.0901679	1.86006
ENSMUSG00000050926	Dcaf12l2	-0.0901521	1.82525
ENSMUSG00000051242	Pcdhb9	-0.0901017	3.80123
ENSMUSG00000085771	C230066G23Rik	-0.0901003	1.64541
ENSMUSG00000021977	1700129C05Rik	-0.090064	1.94285
ENSMUSG00000037762	Slc16a9	-0.0900461	2.1047
ENSMUSG00000026058	Khdrbs2	-0.0900399	2.00783
ENSMUSG00000032179	Bmp5	-0.0900363	2.18475
ENSMUSG00000041583	Obox6	-0.0900006	2.01777
ENSMUSG00000061295	Olfr1261	-0.0899607	1.83208
ENSMUSG00000036139	Hoxc9	-0.0899551	1.82728
ENSMUSG00000032769	Trpa1	-0.0899254	2.23962
ENSMUSG00000024552	Slc14a2	-0.0899238	2.91698
ENSMUSG00000058152	Chsy3	-0.0898802	2.74037
ENSMUSG00000034266	Batf	-0.089861	2.03477
ENSMUSG00000084966	2810471M01Rik	-0.0898563	2.74511
ENSMUSG00000050158	Olfr165	-0.0898393	2.15488
ENSMUSG00000085632	Gm12381	-0.0898226	1.3222
ENSMUSG00000024548	Setbp1	-0.0898096	2.42758
ENSMUSG00000091594	Gm17067	-0.0898084	1.40312
ENSMUSG00000089957	A830011K09Rik	-0.0897898	2.85324
ENSMUSG00000027273	Snap25	-0.0897851	2.24569
ENSMUSG00000055775	Myh8	-0.0897815	1.862
ENSMUSG00000046192	Iqub	-0.0897782	1.38029
ENSMUSG00000053168	9030619P08Rik	-0.0897752	1.58121
ENSMUSG00000097622	A330033J07Rik	-0.0897723	1.60058
ENSMUSG00000037852	Cpe	-0.0897304	2.23208
ENSMUSG00000080876	Gm14332	-0.0897274	1.32679
ENSMUSG00000021640	Naip1	-0.0897224	2.252
ENSMUSG00000041482	Piezo2	-0.0896869	1.96481
ENSMUSG00000023079	Gtf2ird1	-0.0896802	3.22868
ENSMUSG00000038094	Atp13a4	-0.0896254	2.35171
ENSMUSG00000075316	Scn9a	-0.0895988	1.75352
ENSMUSG00000087099	Gm11782	-0.0895637	1.73144
ENSMUSG00000060371	Caln1	-0.0895402	1.86251
ENSMUSG00000093459	5730480H06Rik	-0.0894923	2.80448
ENSMUSG00000034486	Gbx2	-0.0894768	2.5261
ENSMUSG00000056293	Gsdmc2	-0.0894701	2.53899
ENSMUSG00000090120	A730090N16Rik	-0.0894639	1.96699
ENSMUSG00000027556	Car1	-0.0894412	1.92717
ENSMUSG00000008658	Rbfox1	-0.0894248	2.43534
ENSMUSG00000055489	Ano5	-0.089422	1.74772
ENSMUSG00000031576	Kcnu1	-0.0894149	1.39176
ENSMUSG00000019230	Lhx9	-0.0893963	2.04117
ENSMUSG00000029882	2210010C04Rik	-0.0893806	3.21371
ENSMUSG00000087115	Gm12360	-0.0893724	2.43492
ENSMUSG00000058537	AW822073	-0.0893508	2.42298
ENSMUSG00000053030	Spink2	-0.0893018	1.44876
ENSMUSG00000014773	Dll1	-0.0892756	2.93729
ENSMUSG00000019848	Popdc3	-0.0892605	2.13435
ENSMUSG00000086235	Gm16284	-0.0892396	2.4796
ENSMUSG00000085578	Gm11527	-0.0892359	2.22985
ENSMUSG00000022226	Mcpt2	-0.0892077	1.6054
ENSMUSG00000087669	Gm11724	-0.0892018	1.62131
ENSMUSG00000053044	Cd8b1	-0.0891918	1.94699
ENSMUSG00000046449	C77370	-0.0891769	1.59741
ENSMUSG00000020061	Mybpc1	-0.0891751	1.50992
ENSMUSG00000038651	Sycp2l	-0.0891613	1.46093
ENSMUSG00000018906	P4ha2	-0.0891523	1.95706
ENSMUSG00000022053	Ebf2	-0.0891366	1.36382
ENSMUSG00000083132	Gm14422	-0.0891288	1.56473
ENSMUSG00000056863	Olfr702	-0.0891278	1.72326
ENSMUSG00000097135	4932430I15Rik	-0.0891104	2.54909
ENSMUSG00000092120	Vmn2r90	-0.0890948	1.72448
ENSMUSG00000078639	Gm12695	-0.0890451	3.97663
ENSMUSG00000050103	Agmo	-0.0890344	2.07088
ENSMUSG00000054672	5830411N06Rik	-0.0889803	1.93805
ENSMUSG00000080317	Vmn2r-ps94	-0.0889528	2.171
ENSMUSG00000051965	Nanos2	-0.0889387	2.91135
ENSMUSG00000045330	4933402E13Rik	-0.0889062	1.79654
ENSMUSG00000098758	RP24-480M3.2	-0.0888934	2.33337
ENSMUSG00000097017	Gm26707	-0.0888897	2.05261
ENSMUSG00000028545	Bend5	-0.0888867	1.92851
ENSMUSG00000085515	C630028M04Rik	-0.0888747	1.53705
ENSMUSG00000031492	Chrnb3	-0.0888454	2.19185
ENSMUSG00000017922	Prl3c1	-0.0888193	2.43117
ENSMUSG00000086470	Gm12580	-0.0888166	1.96949
ENSMUSG00000056912	1700017N19Rik	-0.0887945	1.36959
ENSMUSG00000020173	Cobl	-0.0887554	2.24545
ENSMUSG00000020945	Lyzl6	-0.0887472	1.88486
ENSMUSG00000055313	Pgbd1	-0.0887441	1.58116
ENSMUSG00000085774	Gm13055	-0.0887423	1.72494
ENSMUSG00000019891	Dcbld1	-0.0887299	2.14215
ENSMUSG00000086496	Gm14204	-0.0887291	2.59118
ENSMUSG00000086060	Gm16084	-0.0886467	1.48688
ENSMUSG00000058071	Olfr818	-0.0886228	3.8321
ENSMUSG00000049758	Olfr1318	-0.0886013	1.82858
ENSMUSG00000087149	Itih5l-ps	-0.0885926	2.13462
ENSMUSG00000092162	Vmn2r86	-0.0885688	1.34185
ENSMUSG00000026432	Avpr1b	-0.0885637	1.81429
ENSMUSG00000086273	4930564K09Rik	-0.0885416	1.47316
ENSMUSG00000046258	Adam29	-0.0885368	1.37412
ENSMUSG00000086022	Rad51ap2	-0.0885323	1.75645
ENSMUSG00000030170	Wnt5b	-0.0884608	1.54379
ENSMUSG00000045094	Arhgef37	-0.0884524	2.08948
ENSMUSG00000051611	Olfr112	-0.0884374	1.43337
ENSMUSG00000026828	Galnt5	-0.0884249	2.07947
ENSMUSG00000054003	Tdrd9	-0.0883731	3.008
ENSMUSG00000037924	Olfr16	-0.0883539	1.7505
ENSMUSG00000022366	Slc22a22	-0.0883354	1.42493
ENSMUSG00000031284	Pak3	-0.0883231	2.04287
ENSMUSG00000034098	Fstl5	-0.0883155	1.53142
ENSMUSG00000067578	Cbln4	-0.0882687	1.82973
ENSMUSG00000034384	Barhl2	-0.0882601	1.76445
ENSMUSG00000055936	AU015836	-0.0882471	1.58069
ENSMUSG00000071424	Grid2	-0.088218	3.41136
ENSMUSG00000098519	RP24-86O15.2	-0.0881904	1.47259
ENSMUSG00000016150	Tenm1	-0.0881665	2.6539
ENSMUSG00000044629	Cnrip1	-0.088159	1.96192
ENSMUSG00000033063	Cntnap3	-0.0881571	2.10845
ENSMUSG00000022428	Cby1	-0.0881292	3.73209
ENSMUSG00000050248	Evc2	-0.0881164	2.96843
ENSMUSG00000030203	Dusp16	-0.0880886	2.95722
ENSMUSG00000075318	Scn2a1	-0.0880679	1.3199
ENSMUSG00000046532	Ar	-0.0880606	1.92943
ENSMUSG00000045912	C2cd4c	-0.0880472	2.71307
ENSMUSG00000086201	Gm6270	-0.0880326	2.95708
ENSMUSG00000038522	AI317395	-0.0880279	1.69182
ENSMUSG00000040616	Tmem51	-0.0879995	2.16899
ENSMUSG00000067597	Dgat2l6	-0.0879694	1.95758
ENSMUSG00000085125	Gm16070	-0.0879648	3.46443
ENSMUSG00000033419	Snap91	-0.0879314	1.99804
ENSMUSG00000021685	Otp	-0.0878769	1.46664
ENSMUSG00000009734	Pou6f2	-0.0878235	3.1838
ENSMUSG00000027869	Hsd3b6	-0.0878108	1.61634
ENSMUSG00000027794	Sohlh2	-0.0878099	2.34934
ENSMUSG00000042360	4930433N12Rik	-0.087792	1.36074
ENSMUSG00000058934	Gm16176	-0.0877767	2.38324
ENSMUSG00000078307	AI593442	-0.0877579	3.11066
ENSMUSG00000024109	Nrxn1	-0.0877578	2.28997
ENSMUSG00000024598	Fbn2	-0.087735	2.5343
ENSMUSG00000021384	Susd3	-0.0877314	4.91842
ENSMUSG00000078190	Dnm3os	-0.0877037	3.12479
ENSMUSG00000029671	Wnt16	-0.0876004	1.79006
ENSMUSG00000031173	Otc	-0.0875999	1.45725
ENSMUSG00000029282	Amtn	-0.0875915	1.38884
ENSMUSG00000070639	Lrrc8b	-0.0875868	1.95861
ENSMUSG00000034110	Kctd7	-0.0875759	3.50045
ENSMUSG00000029408	Abcb9	-0.087574	2.93178
ENSMUSG00000024228	Nudt12	-0.0875662	1.95715
ENSMUSG00000049217	Olfr788	-0.0875512	1.34289
ENSMUSG00000050666	Vstm4	-0.0875264	2.45092
ENSMUSG00000074206	Adh6b	-0.0875143	1.71344
ENSMUSG00000023350	4921501E09Rik	-0.0874979	1.34411
ENSMUSG00000024501	Dpysl3	-0.0874911	1.90363
ENSMUSG00000098075	Gm26994	-0.0874759	1.31546
ENSMUSG00000098137	Gm26919	-0.0874715	2.34299
ENSMUSG00000032452	Clstn2	-0.0874367	1.34729
ENSMUSG00000097131	D230017M19Rik	-0.0874326	2.10902
ENSMUSG00000097259	Gm26766	-0.0874167	1.82963
ENSMUSG00000085171	D830026I12Rik	-0.0874028	1.84953
ENSMUSG00000020467	Efemp1	-0.0873888	1.51728
ENSMUSG00000059227	Olfr494	-0.0873641	1.36213
ENSMUSG00000092564	BC051226	-0.0873554	1.51004
ENSMUSG00000085675	Gm12022	-0.0873364	1.94836
ENSMUSG00000070886	Gm10304	-0.0873358	1.38419
ENSMUSG00000041134	Cyyr1	-0.0873287	1.62059
ENSMUSG00000029683	Lmod2	-0.0873282	2.18397
ENSMUSG00000082872	Gm15773	-0.0873123	1.77378
ENSMUSG00000039315	Clnk	-0.0873048	2.39598
ENSMUSG00000078625	Gm12789	-0.087298	2.34815
ENSMUSG00000039419	Cntnap2	-0.087263	1.98679
ENSMUSG00000010175	Prox1	-0.0872327	2.93847
ENSMUSG00000054951	9130008F23Rik	-0.0872132	1.49083
ENSMUSG00000042121	Ssh1	-0.087186	3.70406
ENSMUSG00000019997	Ctgf	-0.0871614	1.57724
ENSMUSG00000096806	Olfr312	-0.0871394	1.6039
ENSMUSG00000028360	Slc44a5	-0.0871387	2.32002
ENSMUSG00000032625	Thsd7a	-0.0871351	2.18267
ENSMUSG00000059974	Ntm	-0.0870479	1.75393
ENSMUSG00000074591	Gm410	-0.0870198	1.7125
ENSMUSG00000035818	Plekhs1	-0.0870132	3.14456
ENSMUSG00000020698	Cct6b	-0.0870129	1.63176
ENSMUSG00000029663	Gngt1	-0.0870102	1.56109
ENSMUSG00000046593	Tmem215	-0.0869834	2.1509
ENSMUSG00000044022	Pcdhb21	-0.0869824	3.5049
ENSMUSG00000048080	Olfr731	-0.0869267	2.18562
ENSMUSG00000029646	Cdx2	-0.086923	1.47089
ENSMUSG00000029765	Plxna4	-0.0869018	1.79952
ENSMUSG00000055540	Epha6	-0.0868903	1.74157
ENSMUSG00000085057	Gm13415	-0.0868872	1.41829
ENSMUSG00000030617	Ccdc83	-0.0868863	1.90722
ENSMUSG00000093617	4933438K21Rik	-0.0868691	1.94931
ENSMUSG00000079259	Trim71	-0.0868573	1.71295
ENSMUSG00000021087	Rtn1	-0.0868171	1.45282
ENSMUSG00000086761	Gm11666	-0.0868103	2.002
ENSMUSG00000019966	Kitl	-0.0867982	3.96716
ENSMUSG00000086454	4930500J02Rik	-0.0867975	2.17048
ENSMUSG00000069085	Dytn	-0.0867845	2.36261
ENSMUSG00000034958	Atcay	-0.0867765	2.9526
ENSMUSG00000020241	Col6a2	-0.0867481	1.98694
ENSMUSG00000042439	Zfp532	-0.0867233	2.63369
ENSMUSG00000033156	Cst10	-0.0867189	1.85666
ENSMUSG00000086266	Igf2os	-0.0867111	2.48082
ENSMUSG00000027188	Pamr1	-0.0866614	1.38724
ENSMUSG00000081301	Gm15951	-0.0866567	1.7617
ENSMUSG00000037172	E330009J07Rik	-0.086629	3.87886
ENSMUSG00000075206	Olfr1024	-0.0866199	1.77703
ENSMUSG00000022753	Tmem30c	-0.0866164	2.21563
ENSMUSG00000036960	Clca5	-0.0866067	1.60367
ENSMUSG00000027908	Tchhl1	-0.086593	1.78388
ENSMUSG00000048899	Rimkla	-0.0865571	1.65241
ENSMUSG00000020086	H2afy2	-0.0865431	1.81992
ENSMUSG00000097524	Gm26846	-0.0865425	2.65871
ENSMUSG00000082352	Gm13228	-0.0865031	3.70354
ENSMUSG00000085170	4930557C09Rik	-0.0864732	1.95239
ENSMUSG00000046008	Pnlip	-0.0864642	2.53009
ENSMUSG00000048388	Fam171b	-0.0864301	2.06757
ENSMUSG00000035189	Ano4	-0.0864247	1.77638
ENSMUSG00000017064	Prl5a1	-0.0863844	1.74652
ENSMUSG00000063727	Tnfrsf11b	-0.086374	1.41265
ENSMUSG00000022440	C1qtnf6	-0.0863738	2.44195
ENSMUSG00000082694	Gm16187	-0.0863257	2.42852
ENSMUSG00000026344	Lypd1	-0.0863243	1.59288
ENSMUSG00000047155	Cyp4x1	-0.0863218	2.00057
ENSMUSG00000026824	Kcnj3	-0.086315	1.54817
ENSMUSG00000019935	Slc17a8	-0.0863127	1.96791
ENSMUSG00000046768	Rhoj	-0.0862838	3.00229
ENSMUSG00000046678	Olfr981	-0.0862668	2.01252
ENSMUSG00000027368	Dusp2	-0.0861893	2.30613
ENSMUSG00000025927	Tfap2b	-0.0861843	1.69082
ENSMUSG00000033910	Gucy1a3	-0.0861788	2.68775
ENSMUSG00000041991	Hrnr	-0.0861696	2.48645
ENSMUSG00000034584	Exph5	-0.086168	1.93851
ENSMUSG00000029211	Gabra4	-0.0861558	2.93879
ENSMUSG00000057050	Olfr397	-0.0861518	1.62029
ENSMUSG00000078962	4932414J04Rik	-0.0861507	1.58518
ENSMUSG00000025774	Crisp4	-0.086142	2.26536
ENSMUSG00000069823	Olfr1	-0.0861322	1.6754
ENSMUSG00000044286	Olfr221	-0.0861003	1.36517
ENSMUSG00000058400	Qrfpr	-0.0860923	1.83891
ENSMUSG00000025592	Dach2	-0.0860814	1.83196
ENSMUSG00000082043	Gm12848	-0.0860519	1.89204
ENSMUSG00000001211	Agpat3	-0.0860343	2.15464
ENSMUSG00000020839	Tmigd1	-0.0859619	1.86109
ENSMUSG00000040729	AK129341	-0.0859516	2.5253
ENSMUSG00000030393	Zik1	-0.0859503	1.59181
ENSMUSG00000094671	Gm20382	-0.0859407	1.33428
ENSMUSG00000053153	Spag16	-0.0859235	1.9589
ENSMUSG00000083390	Gm13121	-0.0859069	1.60834
ENSMUSG00000097289	2010300F17Rik	-0.0858756	3.37614
ENSMUSG00000043017	Ptgir	-0.0858532	3.10914
ENSMUSG00000026904	Slc4a10	-0.0858437	2.06739
ENSMUSG00000037944	Ccr7	-0.0858272	1.90776
ENSMUSG00000031298	Gpr64	-0.085825	1.998
ENSMUSG00000079008	Gm14124	-0.085769	2.1166
ENSMUSG00000098354	RP23-2C22.3	-0.0857661	2.00708
ENSMUSG00000029420	Rimbp2	-0.085766	3.56593
ENSMUSG00000022791	Tnk2	-0.085764	2.8003
ENSMUSG00000075707	Dio3	-0.0857341	2.45141
ENSMUSG00000029155	Spata18	-0.0857338	1.52473
ENSMUSG00000071112	B230216G23Rik	-0.0857041	3.28661
ENSMUSG00000039913	Pak7	-0.0856751	2.21926
ENSMUSG00000084306	Gm11743	-0.085636	1.72869
ENSMUSG00000024675	Ms4a4c	-0.0856249	3.99796
ENSMUSG00000031410	Nxf7	-0.08562	2.97631
ENSMUSG00000073978	Olfr548-ps1	-0.0855994	1.31974
ENSMUSG00000087035	BC052486	-0.0855901	1.42013
ENSMUSG00000086148	Gm15271	-0.0855837	3.42999
ENSMUSG00000070880	Gad1	-0.0855787	2.74479
ENSMUSG00000036510	Cdh8	-0.0855779	3.03547
ENSMUSG00000030905	Crym	-0.0855777	2.14799
ENSMUSG00000048411	Gm597	-0.0855711	1.77107
ENSMUSG00000079510	Mdga2	-0.0855644	2.05646
ENSMUSG00000053742	Gm5114	-0.0855583	3.12239
ENSMUSG00000053825	Ppfia2	-0.0855339	3.01926
ENSMUSG00000063672	Nkx6-3	-0.0854785	1.58921
ENSMUSG00000037034	Pax1	-0.0854636	2.55122
ENSMUSG00000081595	Gm13036	-0.0854512	1.59752
ENSMUSG00000069818	Olfr390	-0.0854384	1.99739
ENSMUSG00000078601	Gm12525	-0.0853904	1.99856
ENSMUSG00000056445	5730446D14Rik	-0.0853847	1.58295
ENSMUSG00000086353	Gm13481	-0.0853724	2.02615
ENSMUSG00000026100	Mstn	-0.0853688	1.32328
ENSMUSG00000025197	Cyp2c44	-0.0853625	2.19452
ENSMUSG00000058756	Thra	-0.0853251	3.20328
ENSMUSG00000032948	Lipi	-0.0853181	1.88922
ENSMUSG00000087594	BC039771	-0.0853044	2.11781
ENSMUSG00000052479	A330008L17Rik	-0.0852993	1.85313
ENSMUSG00000022057	Adamdec1	-0.0852991	1.38681
ENSMUSG00000074500	Zfp558	-0.0852595	1.82968
ENSMUSG00000086272	BC039966	-0.0852451	1.45251
ENSMUSG00000071551	Akr1c19	-0.0852434	1.83462
ENSMUSG00000035131	Brinp3	-0.0852229	3.3544
ENSMUSG00000056771	Gm10010	-0.0852124	2.44819
ENSMUSG00000031673	Cdh11	-0.0852121	2.4565
ENSMUSG00000022577	Ly6h	-0.0851923	2.46725
ENSMUSG00000050164	Mchr1	-0.0851717	1.83794
ENSMUSG00000031376	Atp2b3	-0.0851627	2.73442
ENSMUSG00000097592	4930500F10Rik	-0.0851596	1.85897
ENSMUSG00000025090	Ccdc172	-0.0850577	1.64158
ENSMUSG00000050875	A730017C20Rik	-0.0850446	2.24458
ENSMUSG00000058435	Btnl4	-0.0850171	1.67331
ENSMUSG00000034732	Pabpc5	-0.0850075	1.31028
ENSMUSG00000030344	Akap3	-0.0849392	1.58519
ENSMUSG00000037455	Slc18b1	-0.0849272	1.31878
ENSMUSG00000039004	Bmp6	-0.0849225	1.57099
ENSMUSG00000054033	Adam39	-0.0849178	2.66956
ENSMUSG00000083202	Gm12388	-0.0849119	2.33994
ENSMUSG00000096463	Gm21750	-0.0849052	1.93126
ENSMUSG00000072753	9230020A06Rik	-0.0848888	1.96902
ENSMUSG00000004360	9330159F19Rik	-0.0848716	3.10613
ENSMUSG00000027861	Casq2	-0.0848468	1.61959
ENSMUSG00000073821	8030451A03Rik	-0.0848435	1.78913
ENSMUSG00000026820	Ptges2	-0.084838	2.06057
ENSMUSG00000080726	Gm15366	-0.0848341	1.59495
ENSMUSG00000085643	Gm12519	-0.084824	1.7752
ENSMUSG00000038656	Cyp3a16	-0.0848144	1.72695
ENSMUSG00000036027	1810046K07Rik	-0.0848038	1.72108
ENSMUSG00000051910	Sox6	-0.0847966	3.33726
ENSMUSG00000094646	Gm10417	-0.084766	2.10319
ENSMUSG00000041644	Slc5a12	-0.0847652	2.02008
ENSMUSG00000056204	Pgpep1	-0.0847574	2.73797
ENSMUSG00000037211	Spry1	-0.0847418	1.61181
ENSMUSG00000068205	Macrod2	-0.0847094	1.60221
ENSMUSG00000081668	Gm7869	-0.0846597	1.31468
ENSMUSG00000096014	Sox1	-0.0846081	1.6654
ENSMUSG00000027971	Ndst4	-0.0846074	2.32737
ENSMUSG00000034275	Igsf9b	-0.0846061	1.89411
ENSMUSG00000040964	Arhgef10l	-0.0845951	2.71266
ENSMUSG00000035296	Sgcg	-0.0845855	1.54453
ENSMUSG00000092032	Vmn2r59	-0.084566	1.39953
ENSMUSG00000097843	Gm26755	-0.0845022	1.63827
ENSMUSG00000031640	Klkb1	-0.0844815	1.38961
ENSMUSG00000097764	Gm26635	-0.0844759	3.07386
ENSMUSG00000068167	Csnka2ip	-0.0844662	1.68926
ENSMUSG00000068083	Cyp2d40	-0.084432	1.74349
ENSMUSG00000082932	Cyp2j8	-0.0844143	1.6517
ENSMUSG00000057037	Cfhr1	-0.0843824	1.89938
ENSMUSG00000066239	Olfr519	-0.0843081	1.81173
ENSMUSG00000068617	Efcab1	-0.0842691	3.06757
ENSMUSG00000054758	Gm9956	-0.084258	1.73102
ENSMUSG00000029757	Dync1i1	-0.0842569	1.87903
ENSMUSG00000019900	Rfx6	-0.0842538	1.39314
ENSMUSG00000028001	Fga	-0.0842497	2.38114
ENSMUSG00000045928	4933440M02Rik	-0.0842307	1.75896
ENSMUSG00000034755	Pcdh11x	-0.0842121	1.74976
ENSMUSG00000096140	Ankrd66	-0.0842107	2.19008
ENSMUSG00000097725	4930593A02Rik	-0.0842097	1.79005
ENSMUSG00000066224	Arid3c	-0.0841931	1.50027
ENSMUSG00000066905	Olfr860	-0.0841877	1.60819
ENSMUSG00000084785	Gm13972	-0.0841668	1.93212
ENSMUSG00000070797	Psg27	-0.0841313	1.30791
ENSMUSG00000047940	Stpg2	-0.0841252	2.23556
ENSMUSG00000031779	Ccl22	-0.084121	2.24217
ENSMUSG00000097348	Rmst	-0.0841066	2.57849
ENSMUSG00000045215	Asxl3	-0.0840625	2.25762
ENSMUSG00000030909	Anks4b	-0.0840593	1.48336
ENSMUSG00000033577	Myo6	-0.084056	3.04084
ENSMUSG00000031561	Tenm3	-0.0840277	2.1971
ENSMUSG00000037747	Phyhipl	-0.0840102	1.55271
ENSMUSG00000082135	Gm14988	-0.0840034	1.96581
ENSMUSG00000031481	Tpte	-0.0839855	2.28695
ENSMUSG00000062393	Dgkk	-0.0839631	2.57909
ENSMUSG00000043289	Mei4	-0.0839295	2.62008
ENSMUSG00000041674	BC006965	-0.0838727	1.42897
ENSMUSG00000026380	Tfcp2l1	-0.0838714	2.40402
ENSMUSG00000075394	Hoxc4	-0.0838607	1.89141
ENSMUSG00000062342	Serpinb9e	-0.0838293	1.36284
ENSMUSG00000026259	Ngef	-0.0838208	1.47393
ENSMUSG00000053441	Adamts19	-0.0838207	2.70454
ENSMUSG00000062939	Stat4	-0.0838203	4.92306
ENSMUSG00000092327	Gm20488	-0.0838004	2.28705
ENSMUSG00000093732	Gm20609	-0.0838003	2.30072
ENSMUSG00000068270	Shroom4	-0.0837553	1.55464
ENSMUSG00000026226	Spata3	-0.0837402	1.57121
ENSMUSG00000066767	Gm3867	-0.0836966	3.36203
ENSMUSG00000027345	4921508D12Rik	-0.0836372	2.21096
ENSMUSG00000003476	Crhr2	-0.0836275	2.15992
ENSMUSG00000083219	Gm11410	-0.0836166	1.88182
ENSMUSG00000028444	Cntfr	-0.0835946	1.72556
ENSMUSG00000089664	Gm12494	-0.0835752	2.22394
ENSMUSG00000078117	Gm16485	-0.083556	1.82002
ENSMUSG00000036244	Tbc1d21	-0.0834826	2.03366
ENSMUSG00000032419	Tbx18	-0.083481	2.44312
ENSMUSG00000053004	Hrh1	-0.0834505	2.02393
ENSMUSG00000034295	Fhod3	-0.0834353	2.32218
ENSMUSG00000051877	Vmn2r72	-0.083383	1.66699
ENSMUSG00000078650	G6pc	-0.0833788	2.28363
ENSMUSG00000045994	B3gat1	-0.0833694	1.78952
ENSMUSG00000047517	Dmbt1	-0.0832857	1.79472
ENSMUSG00000001260	Gabrg1	-0.0832671	1.7131
ENSMUSG00000029321	Slc10a6	-0.0832526	1.30137
ENSMUSG00000056061	Gm14318	-0.0832511	1.79073
ENSMUSG00000053199	Arhgap20	-0.0832465	2.15206
ENSMUSG00000026417	Pigr	-0.083215	3.40819
ENSMUSG00000048562	Sp8	-0.0832119	1.3502
ENSMUSG00000059325	Hopx	-0.0831955	2.12746
ENSMUSG00000065952	C330021F23Rik	-0.0831836	1.5247
ENSMUSG00000073805	Fam196a	-0.0831727	1.68754
ENSMUSG00000086702	Gm12347	-0.0831693	2.64075
ENSMUSG00000080316	4930546H06Rik	-0.0831494	2.56646
ENSMUSG00000048482	Bdnf	-0.0831472	1.80816
ENSMUSG00000055030	Sprr2e	-0.0831332	1.31004
ENSMUSG00000050321	Neto1	-0.0831244	1.49637
ENSMUSG00000091794	Vmn2r18	-0.0830389	2.53017
ENSMUSG00000053093	Myh7	-0.0830242	2.30482
ENSMUSG00000072722	Gm6588	-0.0830107	1.36861
ENSMUSG00000036641	Ccdc148	-0.0829732	2.42304
ENSMUSG00000090039	Gm15894	-0.0829605	2.61984
ENSMUSG00000086017	Gm11872	-0.0829559	1.51606
ENSMUSG00000078599	Skint8	-0.0829502	1.98183
ENSMUSG00000085252	8430437L04Rik	-0.0829478	2.11687
ENSMUSG00000083642	Gm13148	-0.0829415	1.45463
ENSMUSG00000079243	Xirp1	-0.082934	1.89022
ENSMUSG00000006586	Runx1t1	-0.0829339	2.7255
ENSMUSG00000097097	5033426O07Rik	-0.0829038	2.81104
ENSMUSG00000032332	Col12a1	-0.0828923	2.53599
ENSMUSG00000020679	Hnf1b	-0.0828556	1.89103
ENSMUSG00000055609	Hba-x	-0.0828527	1.37311
ENSMUSG00000037243	Zfp692	-0.0828197	4.98435
ENSMUSG00000078496	Gm13152	-0.0828156	1.55922
ENSMUSG00000072419	Dppa2	-0.0827961	1.53419
ENSMUSG00000043753	Dmrta1	-0.0827788	1.51089
[truncated: 9,869 more rows]
